# Supplementary material for: Transcription Factor Binding Site Analysis Identifies FOXO Transcription Factors as Regulators of the Cutaneous Wound Healing Process
Source: PLoS One. 2014 Feb 19;9(2):e89274. doi: 10.1371/journal.pone.0089274 (PMC3929751; doi:10.1371/journal.pone.0089274)
Supplement: Table S3 — List of the 100 most enriched transcription factor binding sites in the promoter regions of the 150 most differentially expressed genes between wounded and non-wounded skin during the proliferative phase of wound healing. FOXO transcription factors have been highlighted in yellow. Please see the methods section for further details. (XLSX) [file pone.0089274.s004.xlsx]

## Sheet: top150_mv_genelist_SMART_Hs_EA.
Supplementary table 3		The most significantly enriched transcription factor binding sites in the promoter regions of the 139 most differentially expressed genes (150 probe sets)
		between wounded and non wounded skin at day 4 in the the E-MEXP-3305 data set.
Transcription factor binding site	Total	No. of hits(NH)	% presence in no. of items	Significant Enrichment (PE)	Significant TF presence in cluster (PP)	'-Log(PE)'	'-Log(PP)'	Median of hits(MH)	SD	NH-MH	hFishers Pvalue	pFishers Pvalue	Targets
STAT6	139	1899	100.0	1.0E-5	0.97783	5.000000010971202	0.009736645845718057	1665.0	47.80499876168129	234.0	2.2928861732572779E-7	0.9780730407921895	ANXA3,SPP1,TDO2,IL7R,IL31RA,CCNB1,PCSK1,HBEGF,CD14,GPX3,SERPINB1,TBX18,SOD2,AGR3,IL6,UPP1,ELN,TFPI2,SERPINE1,NAMPT,TFEC,AKR1B10,DPP6,DEFB4A,PI15,CD274,CCL27,KIAA1045,MELK,OMD,LHX2,C10orf99,HTR7,INA,PLA2G2A,ZC3H12A,ADRB1,TCN1,FOSL1,MMP10,MMP1,MMP12,HTR3A,TMPRSS4,CD163,GPRC5A,GALNT6,NR4A1,KRT6A,WIF1,TSPAN8,LGR5,GJB2,GPR183,ITGBL1,GZMB,DLGAP5,SERPINA1,KIAA0101,CILP,BCL2A1,RHCG,PRSS27,TNFRSF12A,CARHS…
STAT4	139	953	98.56115	1.0E-5	0.16851	5.000000010971202	0.7733743088321959	765.0	41.325747788610876	188.0	4.886844940312347E-10	0.17061362968103247	ANXA3,SPP1,TDO2,IL7R,IL31RA,CCNB1,PCSK1,HBEGF,CD14,GPX3,SERPINB1,TBX18,SOD2,AGR3,IL6,UPP1,ELN,TFPI2,SERPINE1,NAMPT,TFEC,AKR1B10,DPP6,DEFB4A,PI15,CD274,CCL27,KIAA1045,MELK,OMD,LHX2,C10orf99,HTR7,INA,PLA2G2A,ZC3H12A,ADRB1,TCN1,FOSL1,MMP10,MMP1,MMP12,HTR3A,TMPRSS4,CD163,GPRC5A,GALNT6,NR4A1,KRT6A,WIF1,TSPAN8,LGR5,GJB2,GPR183,ITGBL1,GZMB,DLGAP5,SERPINA1,KIAA0101,CILP,BCL2A1,RHCG,PRSS27,TNFRSF12A,CARHS…
FOXP3	139	689	97.84173	1.0E-5	0.02318	5.000000010971202	1.6348865593045168	549.0	31.150561931108925	140.0	3.395659448153792E-8	0.02413190356672726	ANXA3,SPP1,TDO2,IL7R,IL31RA,CCNB1,PCSK1,HBEGF,CD14,GPX3,SERPINB1,TBX18,SOD2,AGR3,IL6,UPP1,TFPI2,SERPINE1,NAMPT,TFEC,AKR1B10,DPP6,DEFB4A,PI15,CD274,CCL27,KIAA1045,MELK,OMD,LHX2,C10orf99,HTR7,INA,PLA2G2A,ZC3H12A,ADRB1,TCN1,FOSL1,MMP10,MMP1,MMP12,HTR3A,TMPRSS4,CD163,GPRC5A,GALNT6,NR4A1,KRT6A,WIF1,TSPAN8,LGR5,GJB2,GPR183,ITGBL1,GZMB,DLGAP5,SERPINA1,KIAA0101,CILP,BCL2A1,RHCG,PRSS27,TNFRSF12A,CARHSP1,T…
FOXO1	139	1917	98.56115	1.0E-5	0.21556	5.000000010971202	0.6664318167852011	1556.0	81.07090552470633	361.0	7.905803877293158E-17	0.21515878208161726	ANXA3,SPP1,TDO2,IL7R,IL31RA,CCNB1,PCSK1,HBEGF,CD14,GPX3,SERPINB1,TBX18,SOD2,AGR3,IL6,UPP1,ELN,TFPI2,SERPINE1,NAMPT,TFEC,AKR1B10,DPP6,DEFB4A,PI15,CD274,CCL27,KIAA1045,MELK,OMD,LHX2,C10orf99,HTR7,INA,PLA2G2A,ZC3H12A,ADRB1,TCN1,FOSL1,MMP10,MMP1,MMP12,HTR3A,TMPRSS4,CD163,GPRC5A,GALNT6,NR4A1,KRT6A,WIF1,TSPAN8,LGR5,GJB2,GPR183,ITGBL1,GZMB,DLGAP5,SERPINA1,KIAA0101,CILP,BCL2A1,RHCG,PRSS27,TNFRSF12A,CARHS…
CMAF	139	758	97.84173	1.0E-5	0.4748	5.000000010971202	0.3234892982661403	611.0	29.129284902475753	147.0	3.9653202213782066E-8	0.4754109407578901	ANXA3,SPP1,TDO2,IL7R,IL31RA,CCNB1,PCSK1,HBEGF,CD14,GPX3,SERPINB1,TBX18,SOD2,AGR3,IL6,UPP1,ELN,SERPINE1,NAMPT,TFEC,AKR1B10,DPP6,DEFB4A,PI15,CD274,CCL27,KIAA1045,MELK,OMD,LHX2,C10orf99,HTR7,INA,PLA2G2A,ZC3H12A,ADRB1,TCN1,FOSL1,MMP10,MMP1,MMP12,HTR3A,TMPRSS4,CD163,GPRC5A,GALNT6,NR4A1,KRT6A,WIF1,TSPAN8,LGR5,GJB2,GPR183,ITGBL1,GZMB,DLGAP5,SERPINA1,KIAA0101,CILP,BCL2A1,RHCG,PRSS27,TNFRSF12A,TPPP3,HAS3,…
STAT5A	139	2439	100.0	1.0E-5	0.902	5.000000010971202	0.04479345763672495	2051.0	75.16371141224816	388.0	6.9653085278544915E-15	0.901680892448484	ANXA3,SPP1,TDO2,IL7R,IL31RA,CCNB1,PCSK1,HBEGF,CD14,GPX3,SERPINB1,TBX18,SOD2,AGR3,IL6,UPP1,ELN,TFPI2,SERPINE1,NAMPT,TFEC,AKR1B10,DPP6,DEFB4A,PI15,CD274,CCL27,KIAA1045,MELK,OMD,LHX2,C10orf99,HTR7,INA,PLA2G2A,ZC3H12A,ADRB1,TCN1,FOSL1,MMP10,MMP1,MMP12,HTR3A,TMPRSS4,CD163,GPRC5A,GALNT6,NR4A1,KRT6A,WIF1,TSPAN8,LGR5,GJB2,GPR183,ITGBL1,GZMB,DLGAP5,SERPINA1,KIAA0101,CILP,BCL2A1,RHCG,PRSS27,TNFRSF12A,CARHS…
SRY	139	1742	100.0	1.0E-5	0.14291	5.000000010971202	0.8449373696471597	1413.0	76.27959407141216	329.0	1.4564055625406563E-15	0.14338482662184118	ANXA3,SPP1,TDO2,IL7R,IL31RA,CCNB1,PCSK1,HBEGF,CD14,GPX3,SERPINB1,TBX18,SOD2,AGR3,IL6,UPP1,ELN,TFPI2,SERPINE1,NAMPT,TFEC,AKR1B10,DPP6,DEFB4A,PI15,CD274,CCL27,KIAA1045,MELK,OMD,LHX2,C10orf99,HTR7,INA,PLA2G2A,ZC3H12A,ADRB1,TCN1,FOSL1,MMP10,MMP1,MMP12,HTR3A,TMPRSS4,CD163,GPRC5A,GALNT6,NR4A1,KRT6A,WIF1,TSPAN8,LGR5,GJB2,GPR183,ITGBL1,GZMB,DLGAP5,SERPINA1,KIAA0101,CILP,BCL2A1,RHCG,PRSS27,TNFRSF12A,CARHS…
BCL6	139	2118	100.0	1.0E-5	0.61507	5.000000010971202	0.21107546546149095	1708.0	73.52257947463335	410.0	1.5622341819482816E-19	0.6134974422254499	ANXA3,SPP1,TDO2,IL7R,IL31RA,CCNB1,PCSK1,HBEGF,CD14,GPX3,SERPINB1,TBX18,SOD2,AGR3,IL6,UPP1,ELN,TFPI2,SERPINE1,NAMPT,TFEC,AKR1B10,DPP6,DEFB4A,PI15,CD274,CCL27,KIAA1045,MELK,OMD,LHX2,C10orf99,HTR7,INA,PLA2G2A,ZC3H12A,ADRB1,TCN1,FOSL1,MMP10,MMP1,MMP12,HTR3A,TMPRSS4,CD163,GPRC5A,GALNT6,NR4A1,KRT6A,WIF1,TSPAN8,LGR5,GJB2,GPR183,ITGBL1,GZMB,DLGAP5,SERPINA1,KIAA0101,CILP,BCL2A1,RHCG,PRSS27,TNFRSF12A,CARHS…
CJUN	139	579	96.40288	1.0E-5	0.12838	5.000000010971202	0.8915026266515165	446.0	24.158298362052758	133.0	6.382103183377019E-9	0.12998225323896642	ANXA3,SPP1,TDO2,IL7R,IL31RA,CCNB1,PCSK1,HBEGF,CD14,GPX3,SERPINB1,SOD2,AGR3,IL6,UPP1,ELN,SERPINE1,NAMPT,TFEC,AKR1B10,DPP6,DEFB4A,PI15,CD274,CCL27,KIAA1045,MELK,OMD,LHX2,C10orf99,HTR7,INA,PLA2G2A,ZC3H12A,TCN1,FOSL1,MMP10,MMP1,MMP12,HTR3A,TMPRSS4,CD163,GPRC5A,GALNT6,NR4A1,KRT6A,WIF1,TSPAN8,LGR5,GJB2,GPR183,ITGBL1,GZMB,DLGAP5,SERPINA1,KIAA0101,CILP,BCL2A1,RHCG,PRSS27,TNFRSF12A,TPPP3,HAS3,CALB2,RAD54L…
AP1	139	3846	96.40288	1.0E-5	0.12806	5.000000010971202	0.8925865087700863	2940.0	163.5632575203127	906.0	2.0700459845554875E-52	0.12946492393665412	ANXA3,SPP1,TDO2,IL7R,IL31RA,CCNB1,PCSK1,HBEGF,CD14,GPX3,SERPINB1,SOD2,AGR3,IL6,UPP1,ELN,SERPINE1,NAMPT,TFEC,AKR1B10,DPP6,DEFB4A,PI15,CD274,CCL27,KIAA1045,MELK,OMD,LHX2,C10orf99,HTR7,INA,PLA2G2A,ZC3H12A,TCN1,FOSL1,MMP10,MMP1,MMP12,HTR3A,TMPRSS4,CD163,GPRC5A,GALNT6,NR4A1,KRT6A,WIF1,TSPAN8,LGR5,GJB2,GPR183,ITGBL1,GZMB,DLGAP5,SERPINA1,KIAA0101,CILP,BCL2A1,RHCG,PRSS27,TNFRSF12A,TPPP3,HAS3,CALB2,RAD54L…
SOX8	139	643	94.96403	1.0E-5	0.03606	5.000000010971202	1.442974257125943	483.0	32.167002673609616	160.0	2.962095641547276E-11	0.03691823757092726	ANXA3,SPP1,TDO2,IL7R,IL31RA,CCNB1,PCSK1,HBEGF,CD14,GPX3,SERPINB1,TBX18,SOD2,AGR3,IL6,UPP1,ELN,TFPI2,SERPINE1,NAMPT,TFEC,AKR1B10,DPP6,DEFB4A,PI15,CD274,CCL27,KIAA1045,MELK,OMD,C10orf99,HTR7,INA,PLA2G2A,ZC3H12A,TCN1,FOSL1,MMP10,MMP1,MMP12,HTR3A,TMPRSS4,CD163,GPRC5A,GALNT6,NR4A1,KRT6A,WIF1,TSPAN8,LGR5,GJB2,GPR183,ITGBL1,GZMB,DLGAP5,SERPINA1,KIAA0101,BCL2A1,RHCG,PRSS27,TNFRSF12A,TPPP3,CDH3,HAS3,CALB2…
PIT1	139	647	94.244606	1.0E-5	0.08633	5.000000010971202	1.0638382762641962	493.0	33.000081068993104	154.0	2.2942554939694194E-10	0.08632394630005395	ANXA3,SPP1,TDO2,IL7R,IL31RA,CCNB1,PCSK1,HBEGF,CD14,GPX3,SERPINB1,TBX18,SOD2,AGR3,IL6,UPP1,TFPI2,SERPINE1,NAMPT,TFEC,AKR1B10,DPP6,DEFB4A,PI15,CD274,CCL27,KIAA1045,MELK,OMD,LHX2,C10orf99,HTR7,INA,PLA2G2A,ZC3H12A,TCN1,FOSL1,MMP10,MMP1,MMP12,HTR3A,TMPRSS4,CD163,GPRC5A,GALNT6,KRT6A,WIF1,TSPAN8,LGR5,GJB2,GPR183,ITGBL1,GZMB,DLGAP5,SERPINA1,CILP,BCL2A1,RHCG,PRSS27,TNFRSF12A,TPPP3,CDH3,HAS3,CALB2,RAD54L,C…
PARP	139	2904	100.0	1.0E-5	0.76228	5.000000010971202	0.11788548191431579	2350.0	100.76151408768786	554.0	2.9633771856625203E-25	0.7662208610939871	ANXA3,SPP1,TDO2,IL7R,IL31RA,CCNB1,PCSK1,HBEGF,CD14,GPX3,SERPINB1,TBX18,SOD2,AGR3,IL6,UPP1,ELN,TFPI2,SERPINE1,NAMPT,TFEC,AKR1B10,DPP6,DEFB4A,PI15,CD274,CCL27,KIAA1045,MELK,OMD,LHX2,C10orf99,HTR7,INA,PLA2G2A,ZC3H12A,ADRB1,TCN1,FOSL1,MMP10,MMP1,MMP12,HTR3A,TMPRSS4,CD163,GPRC5A,GALNT6,NR4A1,KRT6A,WIF1,TSPAN8,LGR5,GJB2,GPR183,ITGBL1,GZMB,DLGAP5,SERPINA1,KIAA0101,CILP,BCL2A1,RHCG,PRSS27,TNFRSF12A,CARHS…
HNF3	139	1035	95.68346	2.0E-5	0.08316	4.6989700153072205	1.0800855294758154	820.0	49.74077154447336	215.0	6.561768458234779E-12	0.08488935463596602	ANXA3,SPP1,TDO2,IL7R,IL31RA,CCNB1,PCSK1,HBEGF,CD14,GPX3,SERPINB1,TBX18,SOD2,AGR3,IL6,UPP1,TFPI2,SERPINE1,NAMPT,TFEC,AKR1B10,DPP6,DEFB4A,PI15,CD274,CCL27,KIAA1045,MELK,OMD,LHX2,C10orf99,HTR7,INA,PLA2G2A,ZC3H12A,ADRB1,TCN1,FOSL1,MMP10,MMP1,MMP12,HTR3A,TMPRSS4,CD163,GPRC5A,NR4A1,KRT6A,WIF1,TSPAN8,LGR5,GJB2,GPR183,ITGBL1,GZMB,DLGAP5,SERPINA1,KIAA0101,CILP,BCL2A1,RHCG,PRSS27,TNFRSF12A,CARHSP1,TPPP3,CD…
MTATA	139	100	51.79856	2.0E-5	1.0E-5	4.6989700153072205	5.000000010971202	60.0	8.669096137654723	40.0	3.161254484314407E-6	1.1766780862066608E-6	ANXA3,IL7R,HBEGF,TBX18,AGR3,NAMPT,AKR1B10,DEFB4A,PI15,CD274,KIAA1045,OMD,C10orf99,ZC3H12A,ADRB1,TCN1,MMP10,MMP1,MMP12,CD163,GPRC5A,NR4A1,KRT6A,TSPAN8,GPR183,ITGBL1,DLGAP5,KIAA0101,RHCG,PRSS27,CDH3,HAS3,RAD54L,CCL18,KRT16,FPR1,UBE2S,SAMSN1,KCNJ15,IL13RA2,IL13RA1,TCHH,LCE3D,SPRR4,SPRR3,SPRR2B,S100A9,S100A12,S100A8,S100A7A,S100A7,S100A2,SELL,SELE,TNN,PTGS2,RGS1,CFH,G0S2,IL1B,CXCR4,ITGB6,SPC25,CTLA4,…
ZTA	139	115	52.517986	2.0E-5	8.6E-4	4.6989700153072205	3.065501563401946	72.0	8.901193768112194	43.0	5.0499615379236315E-6	9.199908661541732E-4	IL7R,IL31RA,CCNB1,CD14,SOD2,IL6,UPP1,TFPI2,NAMPT,TFEC,AKR1B10,DEFB4A,PI15,CCL27,KIAA1045,HTR7,TCN1,FOSL1,MMP1,MMP12,CD163,LGR5,GPR183,GZMB,SERPINA1,KIAA0101,BCL2A1,RHCG,TPPP3,CALB2,NGF,KRT16,DSC2,DSG3,SERPINB4,SERPINB3,IGFL1,KLK6,FPR1,PI3,MMP9,KCNJ15,IL13RA2,TCHH,LCE3D,SPRR3,SPRR2B,S100A12,S100A7A,S100A7,S100A2,SELL,SELE,ANGPTL1,RGS1,TNNT2,IL20,IL24,FAIM3,RRM2,IL1B,CXCR4,CTLA4,CLEC3B,CCR5,KY,EPHB…
HNF3B	139	1257	98.56115	3.0E-5	0.31125	4.522878756251539	0.5068906382328519	1019.0	54.800122010723015	238.0	9.530111351469058E-12	0.3099637969374237	ANXA3,SPP1,TDO2,IL7R,IL31RA,CCNB1,PCSK1,HBEGF,CD14,GPX3,SERPINB1,TBX18,SOD2,AGR3,IL6,UPP1,ELN,TFPI2,SERPINE1,NAMPT,TFEC,AKR1B10,DPP6,DEFB4A,PI15,CD274,CCL27,KIAA1045,MELK,OMD,LHX2,C10orf99,HTR7,INA,PLA2G2A,ZC3H12A,ADRB1,TCN1,FOSL1,MMP10,MMP1,MMP12,HTR3A,TMPRSS4,CD163,GPRC5A,GALNT6,NR4A1,KRT6A,WIF1,TSPAN8,LGR5,GJB2,GPR183,ITGBL1,GZMB,DLGAP5,SERPINA1,KIAA0101,CILP,BCL2A1,RHCG,PRSS27,TNFRSF12A,CARHS…
FOXO4	139	952	98.56115	3.0E-5	0.17762	4.522878756251539	0.7505081497112954	776.0	40.666130031090006	176.0	6.555809417572844E-9	0.17658128015666244	ANXA3,SPP1,TDO2,IL7R,IL31RA,CCNB1,PCSK1,HBEGF,CD14,GPX3,SERPINB1,TBX18,SOD2,AGR3,IL6,UPP1,ELN,TFPI2,SERPINE1,NAMPT,TFEC,AKR1B10,DPP6,DEFB4A,PI15,CD274,CCL27,KIAA1045,MELK,OMD,LHX2,C10orf99,HTR7,INA,PLA2G2A,ZC3H12A,ADRB1,TCN1,FOSL1,MMP10,MMP1,MMP12,HTR3A,TMPRSS4,CD163,GPRC5A,GALNT6,NR4A1,KRT6A,WIF1,TSPAN8,LGR5,GJB2,GPR183,ITGBL1,GZMB,DLGAP5,SERPINA1,KIAA0101,CILP,BCL2A1,RHCG,PRSS27,TNFRSF12A,CARHS…
GFI1	139	1435	94.96403	4.0E-5	0.06338	4.397940019643239	1.1980477447571491	1141.0	71.55205020251287	294.0	2.3788472644515382E-15	0.06435204777300768	ANXA3,SPP1,TDO2,IL7R,IL31RA,CCNB1,PCSK1,HBEGF,CD14,GPX3,SERPINB1,TBX18,SOD2,AGR3,IL6,UPP1,ELN,TFPI2,SERPINE1,NAMPT,TFEC,AKR1B10,DPP6,DEFB4A,PI15,CD274,CCL27,KIAA1045,MELK,OMD,LHX2,C10orf99,HTR7,INA,PLA2G2A,ZC3H12A,ADRB1,TCN1,FOSL1,MMP10,MMP1,MMP12,HTR3A,TMPRSS4,CD163,GPRC5A,GALNT6,KRT6A,WIF1,TSPAN8,LGR5,GJB2,GPR183,ITGBL1,GZMB,DLGAP5,SERPINA1,KIAA0101,CILP,BCL2A1,RHCG,PRSS27,TNFRSF12A,CARHSP1,TPP…
HOXA13	139	1281	97.1223	5.0E-5	0.03356	4.301030006635183	1.4741780431844802	980.0	68.8178737212219	301.0	2.4046842204668974E-18	0.03372529778685412	ANXA3,SPP1,TDO2,IL7R,IL31RA,PCSK1,HBEGF,CD14,GPX3,TBX18,SOD2,AGR3,IL6,UPP1,ELN,TFPI2,SERPINE1,NAMPT,TFEC,AKR1B10,DPP6,DEFB4A,PI15,CD274,CCL27,KIAA1045,MELK,OMD,LHX2,C10orf99,HTR7,INA,PLA2G2A,ZC3H12A,ADRB1,TCN1,FOSL1,MMP10,MMP1,MMP12,HTR3A,TMPRSS4,CD163,GPRC5A,NR4A1,KRT6A,WIF1,TSPAN8,LGR5,GJB2,GPR183,ITGBL1,GZMB,DLGAP5,SERPINA1,KIAA0101,CILP,BCL2A1,RHCG,PRSS27,TNFRSF12A,CARHSP1,TPPP3,CDH3,HAS3,CAL…
FOXJ1	139	280	74.100716	7.0E-5	0.34591	4.154901948386172	0.4610368667020767	209.0	16.898588630860537	71.0	4.764179557571912E-6	0.3460357640744725	ANXA3,SPP1,TDO2,IL7R,IL31RA,CCNB1,PCSK1,CD14,SOD2,AGR3,IL6,TFPI2,NAMPT,TFEC,PI15,CD274,CCL27,KIAA1045,OMD,HTR7,INA,PLA2G2A,ZC3H12A,TCN1,MMP10,MMP1,MMP12,HTR3A,TMPRSS4,CD163,GPRC5A,NR4A1,KRT6A,WIF1,TSPAN8,LGR5,GPR183,ITGBL1,GZMB,DLGAP5,SERPINA1,KIAA0101,CILP,BCL2A1,RHCG,TNFRSF12A,CARHSP1,CDH3,CALB2,CHI3L2,CCL18,DSC2,DSG3,SERPINB4,SERPINB3,IGFL1,C5AR1,FPR1,LILRB1,PI3,MMP9,SAMSN1,KCNJ15,IL13RA2,IL13…
SPI1	139	4122	100.0	7.0E-5	0.96391	4.154901948386172	0.01596352152868108	3614.0	124.1842478299517	508.0	4.4540840898892555E-14	0.9637209362741995	ANXA3,SPP1,TDO2,IL7R,IL31RA,CCNB1,PCSK1,HBEGF,CD14,GPX3,SERPINB1,TBX18,SOD2,AGR3,IL6,UPP1,ELN,TFPI2,SERPINE1,NAMPT,TFEC,AKR1B10,DPP6,DEFB4A,PI15,CD274,CCL27,KIAA1045,MELK,OMD,LHX2,C10orf99,HTR7,INA,PLA2G2A,ZC3H12A,ADRB1,TCN1,FOSL1,MMP10,MMP1,MMP12,HTR3A,TMPRSS4,CD163,GPRC5A,GALNT6,NR4A1,KRT6A,WIF1,TSPAN8,LGR5,GJB2,GPR183,ITGBL1,GZMB,DLGAP5,SERPINA1,KIAA0101,CILP,BCL2A1,RHCG,PRSS27,TNFRSF12A,CARHS…
CEBPE	139	340	85.61151	7.0E-5	0.01227	4.154901948386172	1.911155443222338	258.0	19.449906679567547	82.0	2.5615496134996654E-6	0.012379524800241588	ANXA3,SPP1,TDO2,IL7R,IL31RA,CCNB1,HBEGF,CD14,GPX3,SERPINB1,TBX18,SOD2,AGR3,IL6,UPP1,TFPI2,SERPINE1,TFEC,AKR1B10,DPP6,DEFB4A,PI15,CD274,CCL27,KIAA1045,MELK,OMD,LHX2,C10orf99,HTR7,INA,ZC3H12A,TCN1,FOSL1,MMP1,MMP12,TMPRSS4,CD163,GPRC5A,GALNT6,NR4A1,KRT6A,WIF1,TSPAN8,LGR5,GJB2,GPR183,ITGBL1,GZMB,DLGAP5,SERPINA1,KIAA0101,CILP,BCL2A1,RHCG,TNFRSF12A,CDH3,RAD54L,CHI3L2,NGF,CCL18,KRT16,DSC2,DSG3,SERPINB4,…
JUND	139	152	69.78417	7.0E-5	1.0E-5	4.154901948386172	5.000000010971202	107.0	11.081975183585694	45.0	4.578732419239419E-5	8.341554900674245E-6	ANXA3,SPP1,TDO2,IL7R,IL31RA,PCSK1,HBEGF,CD14,GPX3,SERPINB1,SOD2,IL6,UPP1,NAMPT,TFEC,AKR1B10,DPP6,DEFB4A,PI15,CD274,CCL27,KIAA1045,MELK,OMD,LHX2,C10orf99,HTR7,INA,ZC3H12A,FOSL1,MMP10,MMP1,MMP12,HTR3A,CD163,GPRC5A,NR4A1,KRT6A,WIF1,LGR5,GPR183,GZMB,DLGAP5,BCL2A1,RHCG,PRSS27,TNFRSF12A,TPPP3,CALB2,RAD54L,NGF,CCL18,KRT16,SOCS3,DSC2,DSG3,IGFL1,C5AR1,KLK6,FPR1,LILRB1,UBE2S,PI3,MMP9,SAMSN1,KCNJ15,IL13RA2,…
JUNB	139	152	69.78417	7.0E-5	1.0E-5	4.154901948386172	5.000000010971202	107.0	11.09880390463759	45.0	4.578732419239419E-5	8.341554900674245E-6	ANXA3,SPP1,TDO2,IL7R,IL31RA,PCSK1,HBEGF,CD14,GPX3,SERPINB1,SOD2,IL6,UPP1,NAMPT,TFEC,AKR1B10,DPP6,DEFB4A,PI15,CD274,CCL27,KIAA1045,MELK,OMD,LHX2,C10orf99,HTR7,INA,ZC3H12A,FOSL1,MMP10,MMP1,MMP12,HTR3A,CD163,GPRC5A,NR4A1,KRT6A,WIF1,LGR5,GPR183,GZMB,DLGAP5,BCL2A1,RHCG,PRSS27,TNFRSF12A,TPPP3,CALB2,RAD54L,NGF,CCL18,KRT16,SOCS3,DSC2,DSG3,IGFL1,C5AR1,KLK6,FPR1,LILRB1,UBE2S,PI3,MMP9,SAMSN1,KCNJ15,IL13RA2,…
CDX2	139	1977	97.1223	8.0E-5	0.03179	4.096910023979258	1.4977094795277484	1526.0	103.81537776233071	451.0	1.1544745419692143E-25	0.032726461336481834	ANXA3,SPP1,TDO2,IL7R,IL31RA,PCSK1,HBEGF,CD14,GPX3,TBX18,SOD2,AGR3,IL6,UPP1,ELN,TFPI2,SERPINE1,NAMPT,TFEC,AKR1B10,DPP6,DEFB4A,PI15,CD274,CCL27,KIAA1045,MELK,OMD,LHX2,C10orf99,HTR7,INA,PLA2G2A,ZC3H12A,ADRB1,TCN1,FOSL1,MMP10,MMP1,MMP12,HTR3A,TMPRSS4,CD163,GPRC5A,NR4A1,KRT6A,WIF1,TSPAN8,LGR5,GJB2,GPR183,ITGBL1,GZMB,DLGAP5,SERPINA1,KIAA0101,CILP,BCL2A1,RHCG,PRSS27,TNFRSF12A,CARHSP1,TPPP3,CDH3,HAS3,CAL…
CEBPG	139	255	77.697845	9.0E-5	3.6E-4	4.045757483976831	3.4436974926488686	183.0	17.230949314390273	72.0	8.819998048692652E-7	3.7407110139033565E-4	ANXA3,SPP1,TDO2,IL7R,IL31RA,CCNB1,HBEGF,CD14,GPX3,TBX18,SOD2,AGR3,IL6,TFPI2,SERPINE1,TFEC,AKR1B10,DPP6,DEFB4A,PI15,CD274,CCL27,KIAA1045,OMD,LHX2,C10orf99,HTR7,INA,ZC3H12A,TCN1,FOSL1,MMP10,MMP12,CD163,GPRC5A,GALNT6,NR4A1,KRT6A,WIF1,TSPAN8,LGR5,GPR183,ITGBL1,GZMB,DLGAP5,CILP,BCL2A1,RHCG,TNFRSF12A,CDH3,NGF,CCL18,KRT16,SOCS3,DSC2,DSG3,SERPINB4,SERPINB3,IGFL1,C5AR1,KLK6,FPR1,LILRB1,PI3,SAMSN1,ADAMTS1,…
HOXA9	139	72	39.568344	1.0E-4	1.4E-4	4.000000010971202	3.8538719527221903	43.0	7.109373884076966	29.0	7.188412627034052E-5	1.4135375091366953E-4	ANXA3,TDO2,IL7R,IL31RA,TBX18,AGR3,TFPI2,TFEC,PI15,CD274,OMD,LHX2,C10orf99,PLA2G2A,FOSL1,MMP10,MMP12,CD163,KRT6A,TSPAN8,GPR183,KIAA0101,CILP,CARHSP1,CDH3,SOCS3,DSC2,DSG3,PI3,SAMSN1,KCNJ15,IL13RA2,IL13RA1,TCHH,LCE3D,SPRR4,S100A8,S100A7A,S100A7,SELL,SELE,PTGS2,RGS1,CFH,IL20,IL1B,SPC25,CTLA4,EPHB1,S100P,C1QTNF7,TMPRSS11D,IL8,CXCL2,BTC
GEN	139	2555	100.0	1.1E-4	0.41731	3.9586073114497573	0.37954120872023245	2162.0	96.31881504460515	393.0	2.324753865236289E-14	0.42008533831308464	ANXA3,SPP1,TDO2,IL7R,IL31RA,CCNB1,PCSK1,HBEGF,CD14,GPX3,SERPINB1,TBX18,SOD2,AGR3,IL6,UPP1,ELN,TFPI2,SERPINE1,NAMPT,TFEC,AKR1B10,DPP6,DEFB4A,PI15,CD274,CCL27,KIAA1045,MELK,OMD,LHX2,C10orf99,HTR7,INA,PLA2G2A,ZC3H12A,ADRB1,TCN1,FOSL1,MMP10,MMP1,MMP12,HTR3A,TMPRSS4,CD163,GPRC5A,GALNT6,NR4A1,KRT6A,WIF1,TSPAN8,LGR5,GJB2,GPR183,ITGBL1,GZMB,DLGAP5,SERPINA1,KIAA0101,CILP,BCL2A1,RHCG,PRSS27,TNFRSF12A,CARHS…
TCF11	139	385	89.928055	1.2E-4	0.06769	3.9208187649235766	1.1694754863004577	307.0	20.31168835908175	78.0	3.518473237593546E-5	0.06878335158418798	ANXA3,SPP1,TDO2,IL7R,IL31RA,CCNB1,PCSK1,HBEGF,CD14,GPX3,SERPINB1,TBX18,SOD2,AGR3,IL6,UPP1,TFPI2,NAMPT,TFEC,AKR1B10,DPP6,DEFB4A,PI15,CD274,CCL27,KIAA1045,MELK,OMD,LHX2,C10orf99,HTR7,PLA2G2A,ZC3H12A,ADRB1,TCN1,FOSL1,MMP10,MMP1,MMP12,HTR3A,TMPRSS4,CD163,GPRC5A,GALNT6,KRT6A,WIF1,TSPAN8,LGR5,GJB2,GPR183,ITGBL1,GZMB,DLGAP5,SERPINA1,KIAA0101,BCL2A1,RHCG,PRSS27,TNFRSF12A,TPPP3,CDH3,HAS3,CALB2,RAD54L,CHI3…
HOXB9	139	149	59.71223	1.5E-4	0.00252	3.8239087203164384	2.598599442603157	103.0	11.601117365222201	46.0	2.496923092423556E-5	0.0024975345102669928	ANXA3,SPP1,TDO2,IL7R,IL31RA,HBEGF,CD14,TBX18,AGR3,IL6,UPP1,TFPI2,TFEC,PI15,CD274,OMD,LHX2,C10orf99,HTR7,INA,PLA2G2A,ZC3H12A,ADRB1,TCN1,FOSL1,MMP10,MMP1,MMP12,CD163,GPRC5A,KRT6A,WIF1,TSPAN8,GJB2,GPR183,GZMB,DLGAP5,KIAA0101,CILP,RHCG,PRSS27,TNFRSF12A,CARHSP1,TPPP3,CDH3,CHI3L2,CCL18,SOCS3,DSC2,DSG3,SERPINB4,SERPINB3,FPR1,PI3,KCNJ15,IL13RA2,IL13RA1,TCHH,LCE3D,SPRR4,SPRR2B,S100A8,S100A7A,S100A7,SELL,S…
CDX1	139	973	97.1223	1.5E-4	0.03185	3.8239087203164384	1.496890577226592	756.0	52.10514999633228	217.0	6.467904719982897E-13	0.032726461336481834	ANXA3,SPP1,TDO2,IL7R,IL31RA,PCSK1,HBEGF,CD14,GPX3,TBX18,SOD2,AGR3,IL6,UPP1,ELN,TFPI2,SERPINE1,NAMPT,TFEC,AKR1B10,DPP6,DEFB4A,PI15,CD274,CCL27,KIAA1045,MELK,OMD,LHX2,C10orf99,HTR7,INA,PLA2G2A,ZC3H12A,ADRB1,TCN1,FOSL1,MMP10,MMP1,MMP12,HTR3A,TMPRSS4,CD163,GPRC5A,NR4A1,KRT6A,WIF1,TSPAN8,LGR5,GJB2,GPR183,ITGBL1,GZMB,DLGAP5,SERPINA1,KIAA0101,CILP,BCL2A1,RHCG,PRSS27,TNFRSF12A,CARHSP1,TPPP3,CDH3,HAS3,CAL…
SOX17	139	1810	99.28058	1.7E-4	0.8942	3.7695510802990797	0.048565321359995195	1547.0	70.4650545798238	263.0	1.4981056915943056E-9	0.8943914692372357	ANXA3,SPP1,TDO2,IL7R,IL31RA,CCNB1,PCSK1,HBEGF,CD14,GPX3,SERPINB1,TBX18,SOD2,AGR3,IL6,UPP1,ELN,TFPI2,SERPINE1,NAMPT,TFEC,AKR1B10,DPP6,DEFB4A,PI15,CD274,CCL27,KIAA1045,MELK,OMD,LHX2,C10orf99,HTR7,INA,PLA2G2A,ZC3H12A,ADRB1,TCN1,FOSL1,MMP10,MMP1,MMP12,HTR3A,TMPRSS4,CD163,GPRC5A,GALNT6,NR4A1,KRT6A,WIF1,TSPAN8,LGR5,GJB2,GPR183,ITGBL1,GZMB,DLGAP5,SERPINA1,KIAA0101,CILP,BCL2A1,RHCG,PRSS27,TNFRSF12A,CARHS…
DBP	139	800	98.56115	2.1E-4	0.45006	3.677780708713691	0.34672957454619785	684.0	32.16790787587994	116.0	4.27264688978788E-5	0.44973332699915924	ANXA3,SPP1,TDO2,IL7R,IL31RA,CCNB1,PCSK1,HBEGF,CD14,GPX3,SERPINB1,TBX18,SOD2,AGR3,IL6,UPP1,ELN,TFPI2,SERPINE1,NAMPT,TFEC,AKR1B10,DPP6,DEFB4A,PI15,CD274,CCL27,KIAA1045,MELK,OMD,LHX2,C10orf99,HTR7,INA,PLA2G2A,ZC3H12A,ADRB1,TCN1,FOSL1,MMP10,MMP1,MMP12,HTR3A,TMPRSS4,CD163,GPRC5A,GALNT6,NR4A1,KRT6A,WIF1,TSPAN8,LGR5,GPR183,ITGBL1,GZMB,DLGAP5,SERPINA1,KIAA0101,CILP,BCL2A1,RHCG,TNFRSF12A,CARHSP1,TPPP3,CDH…
SATB1	139	982	97.1223	2.1E-4	0.04327	3.677780708713691	1.363813111573385	766.0	52.83085544603567	216.0	1.186075240322486E-12	0.04298140047356462	ANXA3,SPP1,TDO2,IL7R,IL31RA,PCSK1,HBEGF,CD14,GPX3,TBX18,SOD2,AGR3,IL6,UPP1,ELN,TFPI2,SERPINE1,NAMPT,TFEC,AKR1B10,DPP6,DEFB4A,PI15,CD274,CCL27,KIAA1045,MELK,OMD,LHX2,C10orf99,HTR7,INA,PLA2G2A,ZC3H12A,ADRB1,TCN1,FOSL1,MMP10,MMP1,MMP12,HTR3A,TMPRSS4,CD163,GPRC5A,NR4A1,KRT6A,WIF1,TSPAN8,LGR5,GJB2,GPR183,ITGBL1,GZMB,DLGAP5,SERPINA1,KIAA0101,CILP,BCL2A1,RHCG,PRSS27,TNFRSF12A,CARHSP1,TPPP3,CDH3,HAS3,CAL…
FOXO3	139	303	82.73381	4.4E-4	0.01563	3.356547320121795	1.8060410403311993	238.0	18.8408274847466	65.0	7.676692475667409E-5	0.016098315448343413	ANXA3,SPP1,TDO2,IL7R,IL31RA,CCNB1,PCSK1,CD14,SERPINB1,SOD2,AGR3,IL6,UPP1,TFPI2,SERPINE1,NAMPT,TFEC,AKR1B10,DPP6,DEFB4A,PI15,CD274,CCL27,KIAA1045,MELK,OMD,LHX2,C10orf99,HTR7,INA,PLA2G2A,ZC3H12A,ADRB1,TCN1,MMP10,MMP1,MMP12,HTR3A,CD163,GPRC5A,NR4A1,KRT6A,TSPAN8,LGR5,GPR183,ITGBL1,GZMB,DLGAP5,SERPINA1,KIAA0101,CILP,BCL2A1,RHCG,PRSS27,TNFRSF12A,CARHSP1,CDH3,HAS3,CALB2,RAD54L,CHI3L2,CCL18,KRT16,SERPINB…
HOXD13	139	248	71.942444	5.1E-4	0.04495	3.2924298379712145	1.3472702948317914	187.0	17.460611387739597	61.0	3.8151409073128955E-5	0.046675064911487485	ANXA3,SPP1,TDO2,IL7R,IL31RA,CD14,TBX18,AGR3,IL6,UPP1,TFPI2,NAMPT,TFEC,DEFB4A,PI15,CD274,OMD,LHX2,C10orf99,HTR7,INA,PLA2G2A,ZC3H12A,ADRB1,TCN1,FOSL1,MMP10,MMP1,MMP12,TMPRSS4,CD163,GPRC5A,NR4A1,KRT6A,WIF1,TSPAN8,LGR5,GJB2,GPR183,GZMB,DLGAP5,KIAA0101,RHCG,PRSS27,TNFRSF12A,CARHSP1,CHI3L2,CCL18,SOCS3,DSC2,DSG3,SERPINB4,SERPINB3,IGFL1,FPR1,LILRB1,PI3,MMP9,SAMSN1,ADAMTS1,KCNJ15,IL13RA2,IL13RA1,TCHH,LCE3…
HNF3G	139	351	84.17266	5.4E-4	0.12511	3.2676062569999154	0.9027079746170126	279.0	20.283645137832945	72.0	5.027305782107232E-5	0.1271569971072497	ANXA3,SPP1,TDO2,IL7R,IL31RA,CCNB1,PCSK1,CD14,GPX3,SERPINB1,TBX18,AGR3,IL6,UPP1,TFPI2,SERPINE1,NAMPT,TFEC,AKR1B10,DPP6,PI15,CD274,KIAA1045,OMD,LHX2,C10orf99,HTR7,PLA2G2A,ZC3H12A,ADRB1,TCN1,FOSL1,MMP10,MMP1,MMP12,HTR3A,CD163,GPRC5A,NR4A1,KRT6A,WIF1,TSPAN8,LGR5,GPR183,ITGBL1,GZMB,DLGAP5,SERPINA1,KIAA0101,CILP,BCL2A1,RHCG,TNFRSF12A,CARHSP1,TPPP3,CDH3,HAS3,RAD54L,CHI3L2,CCL18,KRT16,SOCS3,DSC2,DSG3,SER…
SOX1	139	190	62.589928	6.1E-4	0.04963	3.2146701733703456	1.304255714412822	139.0	14.418332882656994	51.0	5.8183271932362365E-5	0.04996070833155826	SPP1,TDO2,IL7R,IL31RA,CCNB1,PCSK1,HBEGF,GPX3,AGR3,ELN,TFPI2,NAMPT,TFEC,AKR1B10,DPP6,PI15,CD274,KIAA1045,MELK,OMD,INA,TCN1,FOSL1,MMP1,MMP12,HTR3A,TMPRSS4,CD163,GALNT6,KRT6A,TSPAN8,GJB2,GPR183,ITGBL1,GZMB,DLGAP5,BCL2A1,PRSS27,TNFRSF12A,HAS3,RAD54L,NGF,CCL18,DSC2,DSG3,SERPINB4,SERPINB3,C5AR1,FPR1,LILRB1,PI3,SAMSN1,KCNJ15,IL13RA2,TCHH,LCE3D,SPRR4,SPRR3,SPRR2B,S100A12,S100A8,S100A2,SELL,SELE,TNN,ANGPT…
HNF3A	139	177	69.06475	6.6E-4	0.00987	3.180456051490634	2.0056828392524726	134.0	12.440358638394498	43.0	4.409985807455963E-4	0.010078795343423921	TDO2,IL31RA,CCNB1,PCSK1,CD14,SERPINB1,SOD2,AGR3,UPP1,TFPI2,SERPINE1,TFEC,AKR1B10,DPP6,CD274,CCL27,MELK,OMD,LHX2,C10orf99,PLA2G2A,ZC3H12A,ADRB1,TCN1,FOSL1,MMP10,MMP1,MMP12,HTR3A,CD163,GPRC5A,TSPAN8,LGR5,GPR183,ITGBL1,GZMB,DLGAP5,KIAA0101,CILP,BCL2A1,RHCG,PRSS27,CARHSP1,TPPP3,RAD54L,CHI3L2,CCL18,SERPINB4,SERPINB3,IGFL1,C5AR1,KLK6,LILRB1,PI3,MMP9,ADAMTS1,IL13RA2,IL13RA1,TCHH,LCE3D,SPRR4,SPRR3,SPRR2B…
AR	139	879	99.28058	6.7E-4	0.74944	3.1739252106285156	0.12526312262089148	772.0	32.1275052744517	107.0	3.851319868582294E-4	0.7489185250157946	ANXA3,SPP1,TDO2,IL7R,IL31RA,CCNB1,PCSK1,HBEGF,CD14,GPX3,SERPINB1,TBX18,SOD2,AGR3,IL6,UPP1,ELN,TFPI2,SERPINE1,NAMPT,TFEC,AKR1B10,DPP6,DEFB4A,PI15,CD274,CCL27,KIAA1045,MELK,OMD,LHX2,C10orf99,HTR7,INA,PLA2G2A,ZC3H12A,ADRB1,TCN1,FOSL1,MMP10,MMP1,MMP12,HTR3A,TMPRSS4,CD163,GPRC5A,GALNT6,NR4A1,KRT6A,WIF1,TSPAN8,LGR5,GJB2,GPR183,ITGBL1,GZMB,DLGAP5,SERPINA1,KIAA0101,CILP,BCL2A1,RHCG,PRSS27,TNFRSF12A,CARHS…
CEBPA	139	792	97.1223	7.1E-4	0.50585	3.1487416555762637	0.2959782310139782	676.0	34.710042832456715	116.0	3.914136457214856E-5	0.5063982345409074	ANXA3,SPP1,TDO2,IL7R,IL31RA,CCNB1,PCSK1,HBEGF,CD14,GPX3,SERPINB1,TBX18,SOD2,AGR3,IL6,UPP1,ELN,TFPI2,SERPINE1,NAMPT,TFEC,AKR1B10,DPP6,DEFB4A,PI15,CD274,CCL27,KIAA1045,MELK,OMD,LHX2,C10orf99,HTR7,INA,PLA2G2A,ZC3H12A,ADRB1,TCN1,FOSL1,MMP10,MMP1,MMP12,HTR3A,TMPRSS4,CD163,GPRC5A,GALNT6,NR4A1,KRT6A,WIF1,TSPAN8,LGR5,GJB2,GPR183,ITGBL1,GZMB,DLGAP5,SERPINA1,KIAA0101,CILP,BCL2A1,PRSS27,TNFRSF12A,CARHSP1,TP…
HMGIY	139	4126	100.0	7.2E-4	0.90888	3.1426674969848873	0.041493455391377686	3590.0	162.98497807672948	536.0	1.4868502079069306E-15	0.9083735631304577	ANXA3,SPP1,TDO2,IL7R,IL31RA,CCNB1,PCSK1,HBEGF,CD14,GPX3,SERPINB1,TBX18,SOD2,AGR3,IL6,UPP1,ELN,TFPI2,SERPINE1,NAMPT,TFEC,AKR1B10,DPP6,DEFB4A,PI15,CD274,CCL27,KIAA1045,MELK,OMD,LHX2,C10orf99,HTR7,INA,PLA2G2A,ZC3H12A,ADRB1,TCN1,FOSL1,MMP10,MMP1,MMP12,HTR3A,TMPRSS4,CD163,GPRC5A,GALNT6,NR4A1,KRT6A,WIF1,TSPAN8,LGR5,GJB2,GPR183,ITGBL1,GZMB,DLGAP5,SERPINA1,KIAA0101,CILP,BCL2A1,RHCG,PRSS27,TNFRSF12A,CARHS…
HOXB13	139	77	38.848923	8.0E-4	0.00799	3.096910023979258	2.097453229482054	51.0	7.621926602609057	26.0	5.685430153127301E-4	0.008072608344917992	SPP1,IL31RA,TBX18,IL6,UPP1,TFPI2,NAMPT,TFEC,CD274,OMD,HTR7,INA,PLA2G2A,MMP10,GPRC5A,TSPAN8,GJB2,GZMB,KIAA0101,RHCG,PRSS27,TNFRSF12A,TPPP3,CCL18,DSC2,DSG3,SERPINB4,SERPINB3,LILRB1,PI3,SAMSN1,KCNJ15,IL13RA1,TCHH,LCE3D,SPRR4,SPRR2B,S100A12,SELL,SELE,RGS1,CFH,G0S2,CCDC85A,ITGB6,SPC25,CTLA4,CCR5,ARL14,C1QTNF7,TMPRSS11D,IL8,CXCL5,BTC
ELF1	139	1572	100.0	8.0E-4	0.72658	3.096910023979258	0.13871654658842192	1397.0	53.1478301091205	175.0	2.6526592607586832E-5	0.7275142325841324	ANXA3,SPP1,TDO2,IL7R,IL31RA,CCNB1,PCSK1,HBEGF,CD14,GPX3,SERPINB1,TBX18,SOD2,AGR3,IL6,UPP1,ELN,TFPI2,SERPINE1,NAMPT,TFEC,AKR1B10,DPP6,DEFB4A,PI15,CD274,CCL27,KIAA1045,MELK,OMD,LHX2,C10orf99,HTR7,INA,PLA2G2A,ZC3H12A,ADRB1,TCN1,FOSL1,MMP10,MMP1,MMP12,HTR3A,TMPRSS4,CD163,GPRC5A,GALNT6,NR4A1,KRT6A,WIF1,TSPAN8,LGR5,GJB2,GPR183,ITGBL1,GZMB,DLGAP5,SERPINA1,KIAA0101,CILP,BCL2A1,RHCG,PRSS27,TNFRSF12A,CARHS…
MEF2C	139	1096	95.68346	8.1E-4	0.37006	3.0915149823397483	0.431727859215005	898.0	58.44742124913297	198.0	1.977150561695214E-9	0.3723697821020559	ANXA3,SPP1,TDO2,IL7R,IL31RA,CCNB1,PCSK1,HBEGF,CD14,GPX3,SERPINB1,TBX18,SOD2,AGR3,IL6,UPP1,TFPI2,SERPINE1,NAMPT,TFEC,AKR1B10,DPP6,DEFB4A,PI15,CD274,CCL27,KIAA1045,MELK,OMD,LHX2,C10orf99,HTR7,INA,PLA2G2A,ZC3H12A,ADRB1,TCN1,FOSL1,MMP10,MMP1,MMP12,HTR3A,TMPRSS4,CD163,GPRC5A,GALNT6,NR4A1,KRT6A,WIF1,TSPAN8,LGR5,GJB2,GPR183,ITGBL1,GZMB,DLGAP5,KIAA0101,BCL2A1,RHCG,PRSS27,TNFRSF12A,CARHSP1,TPPP3,CDH3,HAS3…
FAC1	139	100	50.35971	8.5E-4	0.00139	3.0705810685279826	2.856985202760503	69.0	8.856027210075093	31.0	5.043866505405762E-4	0.0014860677205840178	TDO2,IL31RA,CCNB1,PCSK1,CD14,SOD2,AGR3,IL6,TFPI2,TFEC,PI15,CD274,KIAA1045,HTR7,PLA2G2A,TCN1,MMP10,MMP1,MMP12,HTR3A,TMPRSS4,CD163,KRT6A,ITGBL1,GZMB,KIAA0101,BCL2A1,RHCG,TNFRSF12A,CALB2,CHI3L2,CCL18,DSC2,DSG3,SERPINB4,SERPINB3,C5AR1,FPR1,PI3,MMP9,KCNJ15,IL13RA2,IL13RA1,TCHH,LCE3D,S100A12,S100A8,S100A7A,S100A7,SELL,TNN,ANGPTL1,RGS1,IL24,FAIM3,ATF3,IL1B,CXCR4,ITGB6,CTLA4,CLEC3B,KY,ARL14,S100P,C1QTNF7…
FKHL5	139	256	73.381294	8.8E-4	0.2167	3.0555173244578135	0.6641410835674942	200.0	16.853817373020732	56.0	1.8048360838132842E-4	0.21855792258130335	ANXA3,SPP1,TDO2,IL7R,IL31RA,CCNB1,PCSK1,SERPINB1,SOD2,AGR3,IL6,UPP1,TFPI2,NAMPT,TFEC,AKR1B10,DPP6,PI15,KIAA1045,MELK,OMD,C10orf99,HTR7,INA,PLA2G2A,ZC3H12A,ADRB1,TCN1,MMP10,MMP1,MMP12,HTR3A,CD163,GPRC5A,NR4A1,KRT6A,WIF1,TSPAN8,LGR5,GPR183,ITGBL1,GZMB,DLGAP5,SERPINA1,KIAA0101,CILP,RHCG,TNFRSF12A,CARHSP1,CDH3,CALB2,RAD54L,CHI3L2,KRT16,SOCS3,DSC2,DSG3,SERPINB4,SERPINB3,IGFL1,FPR1,LILRB1,PI3,MMP9,SAMS…
HOXD9	139	141	61.870502	9.1E-4	1.5E-4	3.0409586064966145	3.8239087203164384	101.0	11.673982858236702	40.0	2.1286382020925822E-4	1.564926214761779E-4	TDO2,IL7R,IL31RA,HBEGF,CD14,SOD2,AGR3,TFPI2,NAMPT,TFEC,DPP6,DEFB4A,PI15,CCL27,KIAA1045,OMD,C10orf99,PLA2G2A,ADRB1,TCN1,FOSL1,MMP10,MMP1,CD163,KRT6A,WIF1,TSPAN8,GJB2,GPR183,ITGBL1,GZMB,DLGAP5,SERPINA1,KIAA0101,CILP,RHCG,PRSS27,TNFRSF12A,CARHSP1,TPPP3,CDH3,NGF,CCL18,DSC2,DSG3,SERPINB4,SERPINB3,FPR1,PI3,KCNJ15,IL13RA2,IL13RA1,TCHH,LCE3D,SPRR4,SPRR2B,S100A12,S100A7A,SELL,ANGPTL1,PTGS2,RGS1,CFH,TNNT2,…
MEF2D	139	1096	95.68346	9.1E-4	0.37208	3.0409586064966145	0.42936367553357807	899.0	58.62757650764522	197.0	1.977150561695214E-9	0.3723697821020559	ANXA3,SPP1,TDO2,IL7R,IL31RA,CCNB1,PCSK1,HBEGF,CD14,GPX3,SERPINB1,TBX18,SOD2,AGR3,IL6,UPP1,TFPI2,SERPINE1,NAMPT,TFEC,AKR1B10,DPP6,DEFB4A,PI15,CD274,CCL27,KIAA1045,MELK,OMD,LHX2,C10orf99,HTR7,INA,PLA2G2A,ZC3H12A,ADRB1,TCN1,FOSL1,MMP10,MMP1,MMP12,HTR3A,TMPRSS4,CD163,GPRC5A,GALNT6,NR4A1,KRT6A,WIF1,TSPAN8,LGR5,GJB2,GPR183,ITGBL1,GZMB,DLGAP5,KIAA0101,BCL2A1,RHCG,PRSS27,TNFRSF12A,CARHSP1,TPPP3,CDH3,HAS3…
TATA	139	518	87.76978	0.00112	8.1E-4	2.950781965730247	3.0915149823397483	379.0	34.49127259592437	139.0	9.37083778567596E-11	9.920824907086417E-4	ANXA3,SPP1,TDO2,IL7R,IL31RA,CCNB1,PCSK1,HBEGF,SERPINB1,TBX18,SOD2,AGR3,IL6,UPP1,TFPI2,SERPINE1,NAMPT,TFEC,AKR1B10,DPP6,DEFB4A,PI15,CD274,KIAA1045,OMD,LHX2,C10orf99,HTR7,INA,PLA2G2A,ZC3H12A,ADRB1,TCN1,FOSL1,MMP10,MMP1,MMP12,CD163,GPRC5A,NR4A1,KRT6A,WIF1,TSPAN8,LGR5,GJB2,GPR183,ITGBL1,GZMB,DLGAP5,KIAA0101,BCL2A1,RHCG,PRSS27,TNFRSF12A,CARHSP1,TPPP3,CDH3,HAS3,RAD54L,CHI3L2,NGF,CCL18,KRT16,DSC2,DSG3,S…
BACH2	139	55	32.3741	0.00125	0.00248	2.903089996699182	2.6055483148551066	35.0	6.072900952789553	20.0	0.0014226722915263946	0.0024979349921162293	IL7R,IL31RA,CD14,SOD2,IL6,UPP1,AKR1B10,DEFB4A,PI15,CCL27,KIAA1045,HTR7,FOSL1,MMP1,MMP12,LGR5,GPR183,GZMB,TPPP3,CALB2,NGF,KRT16,DSC2,IGFL1,KLK6,FPR1,MMP9,KCNJ15,TCHH,LCE3D,SPRR3,SPRR2B,S100A2,SELL,SELE,TNNT2,IL20,RRM2,CLEC3B,KY,EPHB1,ARL14,S100P,IL8,AREG
RELA	139	31	15.827338	0.00131	0.01674	2.882728716521509	1.776244549574639	16.0	4.345711359210798	15.0	5.982909143989179E-4	0.016860597780175488	SERPINB1,AGR3,TFPI2,OMD,GALNT6,GPR183,DLGAP5,BCL2A1,RHCG,CCL18,IGFL1,LILRB1,PI3,MMP9,TCHH,SPRR4,S100A9,PTGS2,TMPRSS11D,IL8,CXCL5,CXCL2
LPOLYA	139	387	85.61151	0.00135	0.02617	2.869666220239804	1.5821962701591314	309.0	24.384898844195757	78.0	4.058666936212337E-5	0.026927623429880556	ANXA3,SPP1,TDO2,IL7R,IL31RA,PCSK1,HBEGF,CD14,GPX3,TBX18,SOD2,AGR3,IL6,UPP1,TFPI2,SERPINE1,NAMPT,TFEC,AKR1B10,DPP6,PI15,CD274,KIAA1045,MELK,OMD,LHX2,HTR7,INA,PLA2G2A,ZC3H12A,ADRB1,TCN1,FOSL1,MMP10,MMP1,MMP12,HTR3A,TMPRSS4,CD163,GPRC5A,KRT6A,WIF1,TSPAN8,LGR5,GJB2,GPR183,ITGBL1,GZMB,DLGAP5,KIAA0101,CILP,BCL2A1,RHCG,PRSS27,TNFRSF12A,CARHSP1,TPPP3,CDH3,HAS3,CALB2,RAD54L,CHI3L2,CCL18,SOCS3,DSC2,DSG3,SE…
FEV	139	228	78.41727	0.00138	0.01137	2.860120903961868	1.9442395189087123	181.0	14.717553618828834	47.0	8.865539150436414E-4	0.011232488338691783	ANXA3,SPP1,TDO2,IL7R,IL31RA,CCNB1,HBEGF,CD14,GPX3,SOD2,AGR3,IL6,UPP1,TFPI2,SERPINE1,AKR1B10,DPP6,DEFB4A,PI15,CD274,CCL27,MELK,OMD,LHX2,PLA2G2A,TCN1,MMP10,MMP12,HTR3A,TMPRSS4,CD163,GALNT6,NR4A1,WIF1,TSPAN8,LGR5,GJB2,ITGBL1,GZMB,DLGAP5,SERPINA1,KIAA0101,CILP,RHCG,TNFRSF12A,CARHSP1,HAS3,CALB2,RAD54L,CHI3L2,NGF,SOCS3,DSC2,DSG3,SERPINB4,SERPINB3,IGFL1,C5AR1,FPR1,LILRB1,UBE2S,PI3,MMP9,ADAMTS1,KCNJ15,IL…
TBP	139	1841	97.1223	0.00147	0.04313	2.8326826601010446	1.3652205500045573	1437.0	108.49941273616352	404.0	5.069853777914217E-22	0.043616619439626504	ANXA3,SPP1,TDO2,IL7R,IL31RA,PCSK1,HBEGF,CD14,GPX3,TBX18,SOD2,AGR3,IL6,UPP1,ELN,TFPI2,SERPINE1,NAMPT,TFEC,AKR1B10,DPP6,DEFB4A,PI15,CD274,CCL27,KIAA1045,MELK,OMD,LHX2,C10orf99,HTR7,INA,PLA2G2A,ZC3H12A,ADRB1,TCN1,FOSL1,MMP10,MMP1,MMP12,HTR3A,TMPRSS4,CD163,GPRC5A,NR4A1,KRT6A,WIF1,TSPAN8,LGR5,GJB2,GPR183,ITGBL1,GZMB,DLGAP5,SERPINA1,KIAA0101,CILP,BCL2A1,RHCG,PRSS27,TNFRSF12A,CARHSP1,TPPP3,CDH3,HAS3,CAL…
CEBPD	139	335	78.41727	0.00149	0.44511	2.8268137160496303	0.3515326552090255	270.0	20.87789416503523	65.0	2.273631078220598E-4	0.4466426940250739	ANXA3,SPP1,TDO2,IL7R,IL31RA,CCNB1,PCSK1,CD14,SERPINB1,SOD2,AGR3,IL6,UPP1,SERPINE1,NAMPT,TFEC,AKR1B10,DPP6,DEFB4A,PI15,CD274,KIAA1045,OMD,LHX2,HTR7,PLA2G2A,ZC3H12A,ADRB1,TCN1,MMP10,MMP1,MMP12,HTR3A,TMPRSS4,CD163,GPRC5A,GALNT6,KRT6A,WIF1,TSPAN8,LGR5,GJB2,GPR183,ITGBL1,DLGAP5,SERPINA1,KIAA0101,CILP,BCL2A1,CARHSP1,TPPP3,HAS3,CALB2,RAD54L,CHI3L2,NGF,CCL18,DSC2,DSG3,SERPINB4,SERPINB3,IGFL1,C5AR1,FPR1,U…
SOX18	139	462	84.17266	0.00154	0.26051	2.81247928808285	0.5841756051017976	372.0	28.360604680712406	90.0	1.676915893258926E-5	0.2617456819274255	ANXA3,SPP1,TDO2,IL7R,IL31RA,CCNB1,PCSK1,HBEGF,CD14,GPX3,SERPINB1,TBX18,SOD2,AGR3,IL6,UPP1,ELN,TFPI2,SERPINE1,NAMPT,TFEC,AKR1B10,DPP6,DEFB4A,PI15,CCL27,KIAA1045,MELK,OMD,C10orf99,INA,PLA2G2A,ZC3H12A,TCN1,FOSL1,MMP10,MMP1,MMP12,TMPRSS4,CD163,GPRC5A,GALNT6,NR4A1,KRT6A,WIF1,TSPAN8,GJB2,GPR183,ITGBL1,GZMB,DLGAP5,SERPINA1,KIAA0101,BCL2A1,RHCG,TNFRSF12A,CDH3,HAS3,RAD54L,CHI3L2,NGF,CCL18,DSC2,DSG3,SERPIN…
SOX21	139	370	84.89209	0.00176	0.07042	2.7544873287938323	1.1523039979102019	299.0	23.213691231581375	71.0	1.1580995064763809E-4	0.07037436864627827	ANXA3,SPP1,TDO2,IL7R,IL31RA,CCNB1,PCSK1,HBEGF,CD14,GPX3,SERPINB1,TBX18,SOD2,AGR3,IL6,ELN,TFPI2,SERPINE1,NAMPT,TFEC,AKR1B10,DPP6,DEFB4A,PI15,CCL27,MELK,OMD,C10orf99,HTR7,PLA2G2A,ZC3H12A,TCN1,MMP10,MMP1,MMP12,HTR3A,TMPRSS4,CD163,GPRC5A,GALNT6,NR4A1,KRT6A,TSPAN8,LGR5,GJB2,GPR183,ITGBL1,GZMB,DLGAP5,SERPINA1,KIAA0101,CILP,BCL2A1,RHCG,PRSS27,TNFRSF12A,CDH3,HAS3,CALB2,RAD54L,CHI3L2,NGF,CCL18,DSG3,SERPIN…
JUNDM2	139	72	37.410072	0.00184	8.4E-4	2.735182167353568	3.0757207173857286	47.0	7.819927487514813	25.0	6.443573929523027E-4	0.0010463054471220763	IL7R,IL31RA,CD14,SOD2,AGR3,IL6,UPP1,AKR1B10,DEFB4A,PI15,CCL27,KIAA1045,HTR7,ADRB1,FOSL1,MMP1,MMP12,HTR3A,GPRC5A,LGR5,GPR183,GZMB,PRSS27,TPPP3,CALB2,NGF,KRT16,DSC2,IGFL1,KLK6,FPR1,UBE2S,MMP9,KCNJ15,TCHH,LCE3D,SPRR3,SPRR2B,S100A2,SELL,SELE,TNNT2,IL20,RRM2,NR4A2,CLEC3B,KY,EPHB1,ARL14,S100P,IL8,AREG
CDXA	139	1595	97.84173	0.00193	0.1085	2.714442684772217	0.9645702763688535	1300.0	91.06036180722184	295.0	1.2933334222845478E-13	0.10927693504782965	ANXA3,SPP1,TDO2,IL7R,IL31RA,CCNB1,PCSK1,HBEGF,CD14,GPX3,SERPINB1,TBX18,SOD2,AGR3,IL6,UPP1,TFPI2,SERPINE1,NAMPT,TFEC,AKR1B10,DPP6,DEFB4A,PI15,CD274,CCL27,KIAA1045,MELK,OMD,LHX2,C10orf99,HTR7,INA,PLA2G2A,ZC3H12A,ADRB1,TCN1,FOSL1,MMP10,MMP1,MMP12,HTR3A,TMPRSS4,CD163,GPRC5A,GALNT6,NR4A1,KRT6A,WIF1,TSPAN8,LGR5,GJB2,GPR183,ITGBL1,GZMB,DLGAP5,SERPINA1,KIAA0101,CILP,BCL2A1,RHCG,PRSS27,TNFRSF12A,CARHSP1,T…
FREAC2	139	142	52.517986	0.00207	0.2488	2.6840296693305983	0.6041496334283489	106.0	11.576123424636622	36.0	0.0010361090834353332	0.2516122293811371	ANXA3,TDO2,IL7R,IL31RA,CCNB1,PCSK1,SOD2,AGR3,IL6,NAMPT,TFEC,PI15,KIAA1045,OMD,HTR7,PLA2G2A,ZC3H12A,TCN1,MMP10,MMP1,MMP12,HTR3A,CD163,GPRC5A,NR4A1,KRT6A,TSPAN8,GPR183,ITGBL1,GZMB,DLGAP5,KIAA0101,CILP,RHCG,TNFRSF12A,CDH3,CALB2,CHI3L2,IGFL1,SAMSN1,KCNJ15,IL13RA2,IL13RA1,LCE3D,SPRR4,SPRR3,SPRR2B,S100A9,S100A8,S100A7A,S100A7,SELL,SELE,ANGPTL1,PTGS2,RGS1,CFH,IL24,IL1B,NR4A2,ITGB6,CLEC3B,CCR5,KY,EPHB1,A…
CEBP	139	1100	100.0	0.00228	0.48531	2.642065172286296	0.3139807702926284	986.0	39.19214216842498	114.0	8.733092897224482E-4	0.48740618517807605	ANXA3,SPP1,TDO2,IL7R,IL31RA,CCNB1,PCSK1,HBEGF,CD14,GPX3,SERPINB1,TBX18,SOD2,AGR3,IL6,UPP1,ELN,TFPI2,SERPINE1,NAMPT,TFEC,AKR1B10,DPP6,DEFB4A,PI15,CD274,CCL27,KIAA1045,MELK,OMD,LHX2,C10orf99,HTR7,INA,PLA2G2A,ZC3H12A,ADRB1,TCN1,FOSL1,MMP10,MMP1,MMP12,HTR3A,TMPRSS4,CD163,GPRC5A,GALNT6,NR4A1,KRT6A,WIF1,TSPAN8,LGR5,GJB2,GPR183,ITGBL1,GZMB,DLGAP5,SERPINA1,KIAA0101,CILP,BCL2A1,RHCG,PRSS27,TNFRSF12A,CARHS…
HEN2	139	367	90.647484	0.0023	0.05071	2.638272154345511	1.294906388614955	305.0	19.928004562784547	62.0	9.003734624285736E-4	0.052143386160017444	ANXA3,SPP1,TDO2,IL7R,IL31RA,CCNB1,PCSK1,HBEGF,CD14,GPX3,SERPINB1,TBX18,AGR3,IL6,ELN,TFPI2,SERPINE1,NAMPT,TFEC,AKR1B10,DPP6,DEFB4A,PI15,CD274,KIAA1045,MELK,OMD,LHX2,C10orf99,HTR7,INA,PLA2G2A,ZC3H12A,ADRB1,TCN1,FOSL1,MMP10,MMP12,HTR3A,TMPRSS4,CD163,GPRC5A,GALNT6,NR4A1,KRT6A,WIF1,TSPAN8,LGR5,GJB2,GPR183,ITGBL1,GZMB,SERPINA1,KIAA0101,CILP,BCL2A1,RHCG,TPPP3,CDH3,HAS3,CALB2,CHI3L2,NGF,CCL18,KRT16,SOCS3…
HDX	139	186	69.06475	0.0024	0.01426	2.6197887376605133	1.8458804861201321	145.0	13.713139619060568	41.0	0.0010614174981573112	0.014356192295197964	ANXA3,SPP1,TDO2,IL7R,IL31RA,CCNB1,PCSK1,GPX3,SERPINB1,TBX18,IL6,ELN,TFPI2,TFEC,DPP6,PI15,CD274,KIAA1045,MELK,OMD,LHX2,C10orf99,HTR7,PLA2G2A,ADRB1,TCN1,FOSL1,MMP10,MMP1,MMP12,HTR3A,TMPRSS4,CD163,KRT6A,WIF1,TSPAN8,LGR5,GJB2,GPR183,ITGBL1,KIAA0101,RHCG,PRSS27,TNFRSF12A,CALB2,CHI3L2,NGF,CCL18,KRT16,SOCS3,DSC2,DSG3,SERPINB4,SERPINB3,IGFL1,C5AR1,FPR1,LILRB1,PI3,SAMSN1,KCNJ15,IL13RA1,TCHH,LCE3D,SPRR4,SP…
HOXA10	139	80	40.28777	0.0024	0.00621	2.6197887376605133	2.2069084146109357	55.0	8.181705050406155	25.0	0.0012008405402661989	0.006272266773361741	SPP1,TDO2,IL31RA,GPX3,TBX18,SOD2,AGR3,IL6,TFPI2,TFEC,OMD,LHX2,HTR7,PLA2G2A,ZC3H12A,ADRB1,TCN1,MMP10,MMP12,CD163,GPRC5A,KRT6A,TSPAN8,GPR183,KIAA0101,TNFRSF12A,CARHSP1,CCL18,SOCS3,DSC2,DSG3,SERPINB4,SERPINB3,PI3,SAMSN1,IL13RA2,IL13RA1,LCE3D,SPRR4,S100A12,SELL,SELE,ANGPTL1,PTGS2,CFH,IL20,IL24,ITGB6,CTLA4,CCR5,MME,ARL14,TMPRSS11D,IL8,CXCL5,BTC
MEF2A	139	819	94.244606	0.00247	0.09495	2.6073030557925634	1.0225050402508196	676.0	47.43081820325967	143.0	4.788486489931157E-7	0.09534185625164605	ANXA3,SPP1,TDO2,IL7R,IL31RA,CCNB1,PCSK1,HBEGF,CD14,GPX3,SERPINB1,TBX18,SOD2,AGR3,IL6,UPP1,TFPI2,SERPINE1,NAMPT,TFEC,AKR1B10,DPP6,DEFB4A,PI15,CD274,CCL27,KIAA1045,MELK,OMD,LHX2,C10orf99,HTR7,INA,PLA2G2A,ZC3H12A,ADRB1,TCN1,FOSL1,MMP10,MMP1,MMP12,HTR3A,TMPRSS4,CD163,GPRC5A,GALNT6,NR4A1,KRT6A,WIF1,TSPAN8,LGR5,GJB2,GPR183,ITGBL1,GZMB,DLGAP5,KIAA0101,BCL2A1,RHCG,PRSS27,TNFRSF12A,CARHSP1,TPPP3,CDH3,HAS3…
AIRE	139	30	16.546762	0.00266	0.03965	2.5751183636487154	1.4017568014260429	17.0	4.1475711676953875	13.0	0.002903127149899555	0.04026030560668852	IL7R,CCNB1,HBEGF,MMP1,MMP12,GPRC5A,GZMB,KIAA0101,BCL2A1,KRT16,DSC2,SERPINB4,SERPINB3,SAMSN1,SPRR3,S100A9,RGS1,CFH,IL20,ATF3,SPC25,CCR5,BTC
HBP1	139	429	90.647484	0.0028	0.057	2.552841984143137	1.2441251441004386	357.0	24.889221006618463	72.0	3.2897025439046235E-4	0.057638429868977985	ANXA3,SPP1,TDO2,IL7R,IL31RA,CCNB1,PCSK1,HBEGF,CD14,GPX3,SERPINB1,TBX18,SOD2,AGR3,IL6,UPP1,ELN,TFPI2,SERPINE1,NAMPT,TFEC,AKR1B10,DPP6,DEFB4A,PI15,CD274,CCL27,KIAA1045,MELK,OMD,LHX2,C10orf99,HTR7,INA,PLA2G2A,ADRB1,TCN1,FOSL1,MMP10,MMP1,MMP12,HTR3A,TMPRSS4,CD163,GPRC5A,NR4A1,KRT6A,WIF1,TSPAN8,GJB2,GPR183,ITGBL1,GZMB,DLGAP5,KIAA0101,CILP,BCL2A1,RHCG,PRSS27,TNFRSF12A,CARHSP1,TPPP3,CDH3,HAS3,CALB2,RAD5…
HOXD10	139	212	68.34532	0.00368	0.05973	2.4341521716895866	1.223807479480266	166.0	15.96596297900836	46.0	7.202911932042041E-4	0.059792606572709156	ANXA3,SPP1,TDO2,IL7R,IL31RA,CD14,TBX18,AGR3,IL6,UPP1,TFPI2,NAMPT,TFEC,DEFB4A,PI15,CD274,OMD,LHX2,C10orf99,HTR7,INA,PLA2G2A,ZC3H12A,ADRB1,TCN1,FOSL1,MMP10,MMP1,MMP12,TMPRSS4,CD163,GPRC5A,NR4A1,KRT6A,WIF1,TSPAN8,LGR5,GJB2,GPR183,GZMB,DLGAP5,KIAA0101,RHCG,PRSS27,TNFRSF12A,CARHSP1,CHI3L2,CCL18,SOCS3,DSC2,DSG3,SERPINB4,SERPINB3,IGFL1,LILRB1,PI3,MMP9,SAMSN1,KCNJ15,IL13RA2,IL13RA1,TCHH,LCE3D,SPRR4,SPRR2…
TCF3	139	352	82.73381	0.00372	0.54614	2.4294570693904287	0.26269600198224285	296.0	20.333129813099486	56.0	0.0019122389623427993	0.5448604815026753	SPP1,IL7R,IL31RA,CCNB1,PCSK1,HBEGF,CD14,SERPINB1,TBX18,SOD2,AGR3,IL6,UPP1,TFPI2,SERPINE1,NAMPT,TFEC,AKR1B10,DPP6,PI15,CD274,CCL27,KIAA1045,OMD,C10orf99,HTR7,INA,PLA2G2A,ADRB1,TCN1,FOSL1,MMP10,MMP1,MMP12,HTR3A,TMPRSS4,CD163,GPRC5A,GALNT6,NR4A1,TSPAN8,LGR5,GPR183,ITGBL1,DLGAP5,SERPINA1,KIAA0101,CILP,BCL2A1,RHCG,PRSS27,TPPP3,CDH3,HAS3,RAD54L,CHI3L2,NGF,CCL18,DSC2,DSG3,SERPINB4,SERPINB3,IGFL1,C5AR1,K…
HNF3ALPHA	139	263	75.539566	0.0040	0.21842	2.397939988044157	0.6607075994498287	214.0	17.40902156822926	49.0	0.0015180370507456207	0.21858288446098764	ANXA3,SPP1,TDO2,IL7R,IL31RA,CCNB1,PCSK1,CD14,GPX3,SERPINB1,TBX18,AGR3,IL6,UPP1,TFPI2,SERPINE1,TFEC,AKR1B10,DPP6,PI15,CD274,KIAA1045,OMD,C10orf99,HTR7,PLA2G2A,ZC3H12A,ADRB1,TCN1,FOSL1,MMP10,MMP1,MMP12,HTR3A,CD163,GPRC5A,NR4A1,WIF1,TSPAN8,LGR5,GPR183,ITGBL1,GZMB,DLGAP5,KIAA0101,CILP,BCL2A1,RHCG,TNFRSF12A,CARHSP1,TPPP3,CDH3,CHI3L2,CCL18,KRT16,SOCS3,DSC2,DSG3,SERPINB4,SERPINB3,IGFL1,FPR1,LILRB1,PI3,M…
ELF5	139	3599	100.0	0.00408	0.97818	2.389339850979271	0.009581224954363006	3301.0	108.33594781547504	298.0	7.696364623172183E-6	0.9780730407921895	ANXA3,SPP1,TDO2,IL7R,IL31RA,CCNB1,PCSK1,HBEGF,CD14,GPX3,SERPINB1,TBX18,SOD2,AGR3,IL6,UPP1,ELN,TFPI2,SERPINE1,NAMPT,TFEC,AKR1B10,DPP6,DEFB4A,PI15,CD274,CCL27,KIAA1045,MELK,OMD,LHX2,C10orf99,HTR7,INA,PLA2G2A,ZC3H12A,ADRB1,TCN1,FOSL1,MMP10,MMP1,MMP12,HTR3A,TMPRSS4,CD163,GPRC5A,GALNT6,NR4A1,KRT6A,WIF1,TSPAN8,LGR5,GJB2,GPR183,ITGBL1,GZMB,DLGAP5,SERPINA1,KIAA0101,CILP,BCL2A1,RHCG,PRSS27,TNFRSF12A,CARHS…
ETS	139	1863	100.0	0.0041	0.93479	2.3872161411494073	0.02928593508783055	1698.0	60.22458424713731	165.0	4.092328006062951E-4	0.9356410256127076	ANXA3,SPP1,TDO2,IL7R,IL31RA,CCNB1,PCSK1,HBEGF,CD14,GPX3,SERPINB1,TBX18,SOD2,AGR3,IL6,UPP1,ELN,TFPI2,SERPINE1,NAMPT,TFEC,AKR1B10,DPP6,DEFB4A,PI15,CD274,CCL27,KIAA1045,MELK,OMD,LHX2,C10orf99,HTR7,INA,PLA2G2A,ZC3H12A,ADRB1,TCN1,FOSL1,MMP10,MMP1,MMP12,HTR3A,TMPRSS4,CD163,GPRC5A,GALNT6,NR4A1,KRT6A,WIF1,TSPAN8,LGR5,GJB2,GPR183,ITGBL1,GZMB,DLGAP5,SERPINA1,KIAA0101,CILP,BCL2A1,RHCG,PRSS27,TNFRSF12A,CARHS…
SOX30	139	378	84.89209	0.0041	0.1779	2.3872161411494073	0.7498240484820735	313.0	23.386860692598955	65.0	5.162601820870677E-4	0.17914388364379946	ANXA3,SPP1,TDO2,IL7R,IL31RA,CCNB1,PCSK1,HBEGF,GPX3,SERPINB1,TBX18,SOD2,AGR3,IL6,UPP1,ELN,TFPI2,SERPINE1,NAMPT,TFEC,AKR1B10,DPP6,DEFB4A,PI15,CD274,CCL27,MELK,OMD,LHX2,C10orf99,HTR7,PLA2G2A,ZC3H12A,TCN1,MMP10,MMP1,MMP12,HTR3A,TMPRSS4,CD163,GPRC5A,GALNT6,NR4A1,KRT6A,TSPAN8,LGR5,GJB2,GPR183,ITGBL1,GZMB,DLGAP5,SERPINA1,KIAA0101,BCL2A1,RHCG,TNFRSF12A,CDH3,HAS3,CHI3L2,NGF,CCL18,DSC2,DSG3,SERPINB4,SERPIN…
FRA1	139	167	55.395683	0.00425	0.02946	2.371611046347777	1.5307672593474067	126.0	14.480887232487264	41.0	4.8274548129025345E-4	0.030307232892903463	TDO2,IL7R,IL31RA,HBEGF,CD14,SERPINB1,SOD2,IL6,UPP1,SERPINE1,TFEC,AKR1B10,DEFB4A,PI15,CCL27,KIAA1045,LHX2,C10orf99,HTR7,PLA2G2A,ZC3H12A,FOSL1,MMP1,MMP12,TMPRSS4,CD163,GALNT6,KRT6A,WIF1,LGR5,GJB2,GPR183,GZMB,SERPINA1,KIAA0101,RHCG,TPPP3,CALB2,RAD54L,CHI3L2,NGF,CCL18,KRT16,DSC2,IGFL1,KLK6,FPR1,MMP9,SAMSN1,ADAMTS1,KCNJ15,TYMP,IL13RA1,TCHH,LCE3D,SPRR4,SPRR3,SPRR2B,S100A2,SELL,SELE,ANGPTL1,TNNT2,IL20,G…
FOXA2	139	186	64.7482	0.0043	0.06584	2.3665315296714318	1.1815101881910632	145.0	14.44203510023448	41.0	0.00135891519690383	0.0668221647392944	ANXA3,SPP1,TDO2,IL7R,IL31RA,CCNB1,PCSK1,HBEGF,CD14,TBX18,SOD2,AGR3,IL6,UPP1,TFPI2,TFEC,AKR1B10,PI15,CD274,KIAA1045,MELK,OMD,INA,PLA2G2A,ZC3H12A,TCN1,FOSL1,MMP10,MMP1,MMP12,HTR3A,CD163,GPRC5A,KRT6A,TSPAN8,GPR183,ITGBL1,GZMB,DLGAP5,SERPINA1,KIAA0101,BCL2A1,RHCG,TNFRSF12A,CARHSP1,CDH3,CALB2,CHI3L2,DSG3,SERPINB4,SERPINB3,IGFL1,FPR1,MMP9,SAMSN1,ADAMTS1,IL13RA2,TCHH,LCE3D,SPRR3,SPRR2B,S100A12,S100A8,S1…
NFAT5	139	241	79.85612	0.00457	0.05298	2.3400838119385203	1.2758880600518037	200.0	15.084020444743997	41.0	0.0046478031439149544	0.05364823183818808	SPP1,TDO2,IL7R,IL31RA,CCNB1,PCSK1,CD14,GPX3,SOD2,AGR3,IL6,UPP1,ELN,TFPI2,SERPINE1,NAMPT,TFEC,AKR1B10,DPP6,DEFB4A,PI15,CD274,CCL27,MELK,OMD,LHX2,C10orf99,INA,PLA2G2A,ZC3H12A,ADRB1,TCN1,MMP10,MMP1,MMP12,HTR3A,TMPRSS4,CD163,GPRC5A,GALNT6,NR4A1,KRT6A,WIF1,TSPAN8,GJB2,GPR183,ITGBL1,GZMB,DLGAP5,KIAA0101,CILP,RHCG,CARHSP1,CDH3,HAS3,RAD54L,NGF,CCL18,SOCS3,DSC2,DSG3,C5AR1,KLK6,FPR1,LILRB1,PI3,MMP9,ADAMTS1…
HFH3	139	223	69.78417	0.00464	0.23439	2.333482024968203	0.6300609108368118	179.0	15.735780968781926	44.0	0.0017141938623452422	0.23294842843570296	ANXA3,SPP1,TDO2,IL7R,IL31RA,CCNB1,PCSK1,HBEGF,CD14,GPX3,SERPINB1,AGR3,IL6,UPP1,TFPI2,SERPINE1,TFEC,AKR1B10,DPP6,PI15,CCL27,OMD,C10orf99,HTR7,PLA2G2A,ZC3H12A,ADRB1,TCN1,MMP10,MMP1,MMP12,HTR3A,TMPRSS4,CD163,GPRC5A,NR4A1,WIF1,TSPAN8,LGR5,GJB2,GPR183,ITGBL1,GZMB,DLGAP5,SERPINA1,BCL2A1,RHCG,TNFRSF12A,CARHSP1,CDH3,RAD54L,CHI3L2,KRT16,DSC2,DSG3,SERPINB4,SERPINB3,LILRB1,PI3,SAMSN1,ADAMTS1,KCNJ15,IL13RA2,…
SOX	139	815	100.0	0.00483	0.23045	2.316052870079197	0.6374232793619886	734.0	30.46859470612936	81.0	0.005438731792914737	0.23143601716101111	ANXA3,SPP1,TDO2,IL7R,IL31RA,CCNB1,PCSK1,HBEGF,CD14,GPX3,SERPINB1,TBX18,SOD2,AGR3,IL6,UPP1,ELN,TFPI2,SERPINE1,NAMPT,TFEC,AKR1B10,DPP6,DEFB4A,PI15,CD274,CCL27,KIAA1045,MELK,OMD,LHX2,C10orf99,HTR7,INA,PLA2G2A,ZC3H12A,ADRB1,TCN1,FOSL1,MMP10,MMP1,MMP12,HTR3A,TMPRSS4,CD163,GPRC5A,GALNT6,NR4A1,KRT6A,WIF1,TSPAN8,LGR5,GJB2,GPR183,ITGBL1,GZMB,DLGAP5,SERPINA1,KIAA0101,CILP,BCL2A1,RHCG,PRSS27,TNFRSF12A,CARHS…
SFPI1	139	25	17.266188	0.00489	0.00244	2.31069114247771	2.6126101820423835	14.0	3.7606520289829026	11.0	0.005160099949573973	0.002467505421656192	IL31RA,HBEGF,CD14,TBX18,AGR3,UPP1,CD274,CCL27,PLA2G2A,ADRB1,TMPRSS4,KIAA0101,BCL2A1,TNFRSF12A,SOCS3,C5AR1,LCE3D,S100A8,IL20,SPC25,KY,CXCL5,CXCL2,BTC
CAP	139	570	99.28058	0.00502	0.01557	2.299296279348515	1.8077113926190487	501.0	25.618489326819365	69.0	0.0037899840239174207	0.015202493364499466	ANXA3,SPP1,TDO2,IL7R,IL31RA,CCNB1,PCSK1,HBEGF,CD14,GPX3,SERPINB1,TBX18,SOD2,AGR3,IL6,ELN,TFPI2,SERPINE1,NAMPT,TFEC,AKR1B10,DPP6,DEFB4A,PI15,CD274,CCL27,KIAA1045,MELK,OMD,LHX2,C10orf99,HTR7,INA,PLA2G2A,ZC3H12A,ADRB1,TCN1,FOSL1,MMP10,MMP1,MMP12,HTR3A,TMPRSS4,CD163,GPRC5A,GALNT6,NR4A1,KRT6A,WIF1,TSPAN8,LGR5,GJB2,GPR183,ITGBL1,GZMB,DLGAP5,SERPINA1,KIAA0101,CILP,BCL2A1,RHCG,PRSS27,TNFRSF12A,CARHSP1,TP…
NFKAPPAB	139	26	15.827338	0.00565	0.00847	2.2479515382639903	2.072116601573171	14.0	4.013343726009032	12.0	0.0039986812830642045	0.008475184945648114	TDO2,IL7R,TBX18,UPP1,LHX2,GALNT6,WIF1,TNFRSF12A,CHI3L2,NGF,DSC2,LILRB1,TYMP,SELE,TNN,ANGPTL1,PTGS2,RGS1,NR4A2,ITGB6,CXCL5,CXCL2
RBPJK	139	376	87.76978	0.00588	0.06707	2.230622668773082	1.173471694477572	317.0	22.160149651037234	59.0	0.0017406615733239056	0.06962375105530384	TDO2,IL7R,IL31RA,CCNB1,PCSK1,HBEGF,CD14,GPX3,SERPINB1,TBX18,SOD2,AGR3,IL6,UPP1,ELN,TFPI2,SERPINE1,NAMPT,AKR1B10,DPP6,DEFB4A,PI15,CD274,CCL27,KIAA1045,MELK,LHX2,C10orf99,HTR7,INA,PLA2G2A,ZC3H12A,ADRB1,TCN1,MMP10,MMP1,MMP12,HTR3A,TMPRSS4,CD163,GPRC5A,GALNT6,NR4A1,KRT6A,TSPAN8,LGR5,GJB2,GPR183,ITGBL1,GZMB,DLGAP5,SERPINA1,KIAA0101,CILP,BCL2A1,RHCG,PRSS27,TNFRSF12A,CARHSP1,TPPP3,CDH3,HAS3,CALB2,RAD54L…
XFD1	139	72	41.007195	0.00598	0.00121	2.2232988232839013	2.917214623680038	51.0	7.708360427217836	21.0	0.004026760191433418	0.0012453371503050009	ANXA3,SPP1,TDO2,IL7R,PCSK1,CD14,AGR3,IL6,TFPI2,NAMPT,TFEC,AKR1B10,DEFB4A,KIAA1045,PLA2G2A,ZC3H12A,TCN1,FOSL1,MMP10,MMP1,HTR3A,GPRC5A,TSPAN8,GPR183,DLGAP5,KIAA0101,BCL2A1,CARHSP1,CDH3,CHI3L2,DSG3,SERPINB4,FPR1,PI3,SPRR2B,S100A9,S100A8,S100A7A,S100A7,SELE,ANGPTL1,PTGS2,RGS1,CFH,TNNT2,IL24,ATF3,ITGB6,SPC25,CLEC3B,KY,ARL14,C1QTNF7,TMPRSS11D,IL8,CXCL2,BTC
SOX10	139	2325	99.28058	0.00605	0.50685	2.218244627700801	0.2951205455739363	2071.0	98.65254188232281	254.0	7.405528104118204E-7	0.5095529957185922	ANXA3,SPP1,TDO2,IL7R,IL31RA,CCNB1,PCSK1,HBEGF,CD14,GPX3,SERPINB1,TBX18,SOD2,AGR3,IL6,UPP1,ELN,TFPI2,SERPINE1,NAMPT,TFEC,AKR1B10,DPP6,DEFB4A,PI15,CD274,CCL27,KIAA1045,MELK,OMD,LHX2,C10orf99,HTR7,INA,PLA2G2A,ZC3H12A,ADRB1,TCN1,FOSL1,MMP10,MMP1,MMP12,HTR3A,TMPRSS4,CD163,GPRC5A,GALNT6,NR4A1,KRT6A,WIF1,TSPAN8,LGR5,GJB2,GPR183,ITGBL1,GZMB,DLGAP5,SERPINA1,KIAA0101,CILP,BCL2A1,RHCG,PRSS27,TNFRSF12A,CARHS…
ARID3A	139	300	79.13669	0.00611	0.01291	2.2139587927125133	1.889073756099415	241.0	21.843280652474725	59.0	3.872169288030772E-4	0.0131761856231044	ANXA3,SPP1,TDO2,IL7R,IL31RA,PCSK1,HBEGF,CD14,GPX3,SERPINB1,TBX18,SOD2,AGR3,IL6,TFPI2,SERPINE1,NAMPT,TFEC,AKR1B10,DEFB4A,PI15,CD274,CCL27,KIAA1045,OMD,LHX2,C10orf99,HTR7,INA,PLA2G2A,ADRB1,TCN1,FOSL1,MMP10,MMP1,MMP12,HTR3A,TMPRSS4,CD163,GPRC5A,GALNT6,NR4A1,KRT6A,WIF1,TSPAN8,LGR5,GJB2,GPR183,ITGBL1,GZMB,DLGAP5,BCL2A1,RHCG,HAS3,RAD54L,CHI3L2,CCL18,DSC2,DSG3,SERPINB4,SERPINB3,C5AR1,FPR1,PI3,MMP9,SAMSN…
GFI1B	139	55	32.3741	0.00644	0.00765	2.1911141230032922	2.1163385623931372	37.0	6.356598160771028	18.0	0.0061108647879291895	0.007518974579952407	ANXA3,IL7R,IL31RA,PCSK1,TBX18,IL6,TFPI2,PI15,CD274,OMD,HTR7,TCN1,MMP10,MMP12,HTR3A,CD163,WIF1,TSPAN8,LGR5,SERPINA1,KIAA0101,PRSS27,IGFL1,KLK6,LILRB1,PI3,SAMSN1,IL13RA1,SPRR4,SPRR3,S100A12,SELL,SELE,ANGPTL1,G0S2,CCDC85A,SPC25,CTLA4,EPHB1,MME,C1QTNF7,TMPRSS11D,IL8,CXCL5,BTC
CEBPB	139	358	66.18705	0.00648	0.54494	2.188424995347805	0.2636513167265674	289.0	26.256310801661012	69.0	1.493532289523578E-4	0.5456934788503448	ANXA3,SPP1,TDO2,IL7R,IL31RA,CCNB1,CD14,GPX3,SERPINB1,IL6,UPP1,NAMPT,TFEC,AKR1B10,DPP6,DEFB4A,PI15,CD274,OMD,HTR7,ZC3H12A,ADRB1,TCN1,FOSL1,MMP1,MMP12,TMPRSS4,CD163,GPRC5A,GALNT6,KRT6A,WIF1,TSPAN8,LGR5,GJB2,GPR183,ITGBL1,SERPINA1,KIAA0101,BCL2A1,CDH3,HAS3,RAD54L,CHI3L2,NGF,CCL18,DSC2,DSG3,SERPINB4,C5AR1,FPR1,UBE2S,PI3,MMP9,SAMSN1,KCNJ15,IL13RA2,IL13RA1,LCE3D,SPRR4,SPRR3,SPRR2B,S100A9,S100A12,S100A8…
XVENT1	139	156	55.395683	0.0067	0.55022	2.1739252106285156	0.2594636174508344	123.0	12.313056688312601	33.0	0.0038103725486559356	0.5512647505308004	SPP1,IL7R,IL31RA,CCNB1,PCSK1,SERPINB1,TBX18,AGR3,TFPI2,DEFB4A,PI15,KIAA1045,MELK,OMD,LHX2,HTR7,ZC3H12A,TCN1,MMP10,MMP1,MMP12,HTR3A,TMPRSS4,CD163,GALNT6,KRT6A,WIF1,TSPAN8,LGR5,GPR183,ITGBL1,DLGAP5,BCL2A1,RHCG,NGF,DSC2,SERPINB4,SERPINB3,IGFL1,C5AR1,KLK6,LILRB1,UBE2S,PI3,MMP9,SAMSN1,KCNJ15,IL13RA2,LCE3D,SPRR4,SPRR2B,S100A12,S100A8,SELL,TNN,PTGS2,RGS1,CFH,TNNT2,IL20,IL24,FAIM3,G0S2,CCDC85A,CXCR4,NR4A…
PRX2	139	164	64.02878	0.0069	0.01552	2.161150914280496	1.8091082859049383	129.0	13.333025344125385	35.0	0.003089258851114127	0.015832259922013564	ANXA3,SPP1,TDO2,IL7R,IL31RA,PCSK1,HBEGF,CD14,SERPINB1,TBX18,AGR3,IL6,TFPI2,TFEC,DEFB4A,PI15,CD274,CCL27,OMD,C10orf99,HTR7,PLA2G2A,ADRB1,TCN1,FOSL1,MMP10,MMP1,MMP12,HTR3A,TMPRSS4,GPRC5A,GALNT6,TSPAN8,GPR183,ITGBL1,GZMB,DLGAP5,KIAA0101,BCL2A1,RHCG,TNFRSF12A,CALB2,NGF,CCL18,KRT16,DSC2,DSG3,PI3,SAMSN1,KCNJ15,IL13RA2,IL13RA1,TCHH,LCE3D,SPRR4,SPRR3,SPRR2B,S100A12,S100A8,S100A7A,S100A7,SELE,TNN,ANGPTL1,…
LEF1	139	2797	100.0	0.00719	0.28783	2.1432711216870355	0.5408639496222928	2532.0	105.97063432691286	265.0	3.8390145850484264E-6	0.2873511486709765	ANXA3,SPP1,TDO2,IL7R,IL31RA,CCNB1,PCSK1,HBEGF,CD14,GPX3,SERPINB1,TBX18,SOD2,AGR3,IL6,UPP1,ELN,TFPI2,SERPINE1,NAMPT,TFEC,AKR1B10,DPP6,DEFB4A,PI15,CD274,CCL27,KIAA1045,MELK,OMD,LHX2,C10orf99,HTR7,INA,PLA2G2A,ZC3H12A,ADRB1,TCN1,FOSL1,MMP10,MMP1,MMP12,HTR3A,TMPRSS4,CD163,GPRC5A,GALNT6,NR4A1,KRT6A,WIF1,TSPAN8,LGR5,GJB2,GPR183,ITGBL1,GZMB,DLGAP5,SERPINA1,KIAA0101,CILP,BCL2A1,RHCG,PRSS27,TNFRSF12A,CARHS…
SOX9	139	678	98.56115	0.0072	0.15449	2.142667511028924	0.8110996435530358	601.0	30.75809605180236	77.0	0.00330760282455848	0.1560496345755046	ANXA3,SPP1,TDO2,IL7R,IL31RA,CCNB1,PCSK1,HBEGF,CD14,GPX3,SERPINB1,TBX18,SOD2,AGR3,IL6,UPP1,ELN,TFPI2,SERPINE1,NAMPT,TFEC,AKR1B10,DPP6,DEFB4A,PI15,CD274,CCL27,KIAA1045,MELK,OMD,LHX2,C10orf99,HTR7,INA,PLA2G2A,ZC3H12A,ADRB1,TCN1,FOSL1,MMP10,MMP1,MMP12,HTR3A,TMPRSS4,CD163,GPRC5A,GALNT6,NR4A1,KRT6A,WIF1,TSPAN8,LGR5,GJB2,GPR183,ITGBL1,GZMB,SERPINA1,KIAA0101,CILP,BCL2A1,RHCG,PRSS27,TNFRSF12A,CARHSP1,CDH3…
TEF	139	85	43.88489	0.00843	0.04241	2.07417240504725	1.3725317156746168	64.0	8.22875929621745	21.0	0.009995550263183127	0.0429443283728327	ANXA3,IL31RA,GPX3,SERPINB1,SOD2,UPP1,ELN,TFEC,AKR1B10,DPP6,PI15,CD274,OMD,C10orf99,PLA2G2A,TCN1,MMP10,MMP1,GALNT6,NR4A1,KRT6A,TSPAN8,GJB2,GPR183,GZMB,DLGAP5,SERPINA1,CILP,BCL2A1,RHCG,TPPP3,CALB2,NGF,SOCS3,SERPINB4,SERPINB3,C5AR1,KLK6,SAMSN1,IL13RA2,IL13RA1,LCE3D,SPRR2B,S100A12,S100A8,S100A7A,S100A7,SELL,SELE,RGS1,TNNT2,IL20,IL24,CCDC85A,ITGB6,CLEC3B,C1QTNF7,TMPRSS11D,IL8,CXCL5,CXCL2
SOX14	139	376	84.89209	0.00899	0.17606	2.0462403081659915	0.7543392876239062	317.0	23.70346168730474	59.0	0.0017769421195280735	0.1795582727206295	ANXA3,SPP1,TDO2,IL7R,IL31RA,CCNB1,PCSK1,HBEGF,CD14,GPX3,SERPINB1,AGR3,IL6,UPP1,ELN,TFPI2,SERPINE1,NAMPT,TFEC,AKR1B10,DPP6,DEFB4A,PI15,CD274,CCL27,KIAA1045,MELK,OMD,C10orf99,HTR7,PLA2G2A,ZC3H12A,TCN1,MMP10,MMP1,MMP12,HTR3A,TMPRSS4,CD163,GPRC5A,GALNT6,NR4A1,KRT6A,TSPAN8,LGR5,GJB2,GPR183,ITGBL1,GZMB,DLGAP5,SERPINA1,KIAA0101,CILP,BCL2A1,RHCG,PRSS27,TNFRSF12A,CDH3,HAS3,RAD54L,CHI3L2,CCL18,DSC2,DSG3,SE…
CDPCR3	139	5	3.5971222	0.00899	0.00899	2.0462403081659915	2.0462403081659915	1.0	1.1116035890101992	4.0	0.010040095259963574	0.009154144120694985	CILP,KRT16,SAMSN1,CLEC3B,IL8
TFE	139	161	62.589928	0.00906	0.01457	2.042871798994583	1.836540458659017	122.0	13.787780910647044	39.0	7.977114441865535E-4	0.015490733853553446	ANXA3,TDO2,IL31RA,PCSK1,HBEGF,CD14,SERPINB1,SOD2,AGR3,ELN,SERPINE1,DPP6,DEFB4A,PI15,CD274,CCL27,KIAA1045,LHX2,INA,PLA2G2A,ZC3H12A,ADRB1,TCN1,MMP10,MMP1,MMP12,HTR3A,CD163,GPRC5A,GALNT6,KRT6A,WIF1,DLGAP5,SERPINA1,KIAA0101,CILP,BCL2A1,RHCG,CALB2,CHI3L2,NGF,CCL18,KRT16,DSC2,SERPINB4,SERPINB3,IGFL1,LILRB1,PI3,KCNJ15,TYMP,TCHH,LCE3D,SPRR4,SPRR3,S100A9,S100A12,S100A8,S100A7A,S100A7,S100A2,SELL,ANGPTL1,P…
TEF1	139	347	80.57554	0.00909	0.00126	2.041436124794424	2.899629438267138	286.0	24.17728361830815	61.0	6.510261564380787E-4	0.0013442790598412633	ANXA3,SPP1,IL7R,IL31RA,CCNB1,PCSK1,CD14,GPX3,SERPINB1,TBX18,SOD2,AGR3,UPP1,ELN,TFPI2,NAMPT,TFEC,AKR1B10,DPP6,DEFB4A,PI15,CCL27,KIAA1045,C10orf99,HTR7,PLA2G2A,ZC3H12A,TCN1,MMP10,MMP1,MMP12,HTR3A,TMPRSS4,CD163,GPRC5A,GALNT6,NR4A1,KRT6A,WIF1,TSPAN8,GJB2,GPR183,GZMB,DLGAP5,SERPINA1,KIAA0101,CILP,BCL2A1,RHCG,CARHSP1,TPPP3,CDH3,HAS3,CALB2,CHI3L2,NGF,CCL18,SOCS3,DSC2,SERPINB4,SERPINB3,IGFL1,C5AR1,KLK6,L…
MITF	139	161	62.589928	0.00943	0.01544	2.025488324433057	1.8113526977802734	122.0	13.855811433329979	39.0	8.390941032139818E-4	0.01553946373436777	ANXA3,TDO2,IL31RA,PCSK1,HBEGF,CD14,SERPINB1,SOD2,AGR3,ELN,SERPINE1,DPP6,DEFB4A,PI15,CD274,CCL27,KIAA1045,LHX2,INA,PLA2G2A,ZC3H12A,ADRB1,TCN1,MMP10,MMP1,MMP12,HTR3A,CD163,GPRC5A,GALNT6,KRT6A,WIF1,DLGAP5,SERPINA1,KIAA0101,CILP,BCL2A1,RHCG,CALB2,CHI3L2,NGF,CCL18,KRT16,DSC2,SERPINB4,SERPINB3,IGFL1,LILRB1,PI3,KCNJ15,TYMP,TCHH,LCE3D,SPRR4,SPRR3,S100A9,S100A12,S100A8,S100A7A,S100A7,S100A2,SELL,ANGPTL1,P…
