# Supplementary material for: Transcription Factor Binding Site Analysis Identifies FOXO Transcription Factors as Regulators of the Cutaneous Wound Healing Process
Source: PLoS One. 2014 Feb 19;9(2):e89274. doi: 10.1371/journal.pone.0089274 (PMC3929751; doi:10.1371/journal.pone.0089274)
Supplement: Table S4 — List of the 100 most significantly enriched transcription factor binding sites in the promoter regions of the 200 most differentially expressed genes between wounded and non-wounded skin during the proliferative phase of wound healing. FOXO transcription factors have been highlighted in yellow. Please see the methods section for further details. (XLSX) [file pone.0089274.s005.xlsx]

## Sheet: top200_mv_genelist_SMART_Hs_EA.
Supplementary table 4		The most significantly enriched transcription factor binding sites in the promoter regions of the 197 most differentially expressed genes (200 probe sets)
		between wounded and non wounded skin at day 4 in the the E-MEXP-3305 data set.
Transcription facto binding site	Total	No. of hits(NH)	% presence in no. of items	Significant Enrichment (PE)	Significant TF presence in cluster (PP)	'-Log(PE)'	'-Log(PP)'	Median of hits(MH)	SD	NH-MH	hFishers Pvalue	pFishers Pvalue	Targets
STAT6	197	2630	100.0	1.0E-5	0.96933	5.000000010971202	0.013528340248454404	2360.0	56.85875892706808	270.0	3.3741627033011413E-7	0.969113177316069	ANXA3,SPP1,CENPE,DKK2,TDO2,IL7R,IL31RA,CCNB1,EDIL3,PCSK1,LOX,HBEGF,CD14,GPX3,SERPINB1,TBX18,SGK1,SOD2,AGR3,IL6,INHBA,UPP1,ELN,TFPI2,TAC1,ARPC1B,SERPINE1,NAMPT,TFEC,AKR1B10,DPP6,DEFB4A,PBK,XKR4,PI15,FAM83A,CD274,CCL27,KIAA1045,MELK,MAMDC2,CTSL1,CKS2,OMD,ECM2,TNC,LHX2,SLC25A25,FCN1,SLC16A9,SRGN,C10orf99,HTR7,CEP55,INA,HSPB7,PLA2G2A,ZC3H12A,ADRB1,ADAM12,MKI67,ELF5,TCN1,MS4A7,FOSL1,MMP10,MMP1,MMP12,H…
HNF3B	197	1721	98.47716	1.0E-5	0.25706	5.000000010971202	0.5899655113921214	1444.0	65.5047904627918	277.0	1.5556334234227987E-11	0.2594224310194482	ANXA3,SPP1,CENPE,DKK2,TDO2,IL7R,IL31RA,CCNB1,EDIL3,PCSK1,LOX,HBEGF,CD14,GPX3,SERPINB1,TBX18,SGK1,SOD2,AGR3,IL6,INHBA,UPP1,ELN,TFPI2,TAC1,ARPC1B,SERPINE1,NAMPT,TFEC,AKR1B10,DPP6,DEFB4A,PBK,PI15,FAM83A,CD274,CCL27,KIAA1045,MELK,MAMDC2,CTSL1,CKS2,OMD,ECM2,TNC,LHX2,SLC25A25,FCN1,SLC16A9,SRGN,C10orf99,HTR7,CEP55,INA,HSPB7,PLA2G2A,ZC3H12A,ADRB1,ADAM12,MKI67,ELF5,TCN1,MS4A7,FOSL1,MMP10,MMP1,MMP12,HTR3A,…
FOXO1	197	2621	98.47716	1.0E-5	0.16153	5.000000010971202	0.7917467989914941	2205.0	96.87056013380113	416.0	3.2764682970498746E-16	0.16092170131243	ANXA3,SPP1,CENPE,DKK2,TDO2,IL7R,IL31RA,CCNB1,EDIL3,PCSK1,LOX,HBEGF,CD14,GPX3,SERPINB1,TBX18,SGK1,SOD2,AGR3,IL6,INHBA,UPP1,ELN,TFPI2,TAC1,ARPC1B,SERPINE1,NAMPT,TFEC,AKR1B10,DPP6,DEFB4A,PBK,PI15,FAM83A,CD274,CCL27,KIAA1045,MELK,MAMDC2,CTSL1,CKS2,OMD,ECM2,TNC,LHX2,SLC25A25,FCN1,SLC16A9,SRGN,C10orf99,HTR7,CEP55,INA,HSPB7,PLA2G2A,ZC3H12A,ADRB1,ADAM12,MKI67,ELF5,TCN1,MS4A7,FOSL1,MMP10,MMP1,MMP12,HTR3A,…
CMAF	197	1043	97.96954	1.0E-5	0.37567	5.000000010971202	0.4251935013196523	865.0	34.682866934687695	178.0	1.8099562425713756E-8	0.3776890999739661	ANXA3,SPP1,CENPE,DKK2,TDO2,IL7R,IL31RA,CCNB1,EDIL3,PCSK1,LOX,HBEGF,CD14,GPX3,SERPINB1,TBX18,SGK1,SOD2,AGR3,IL6,INHBA,UPP1,ELN,TAC1,ARPC1B,SERPINE1,NAMPT,TFEC,AKR1B10,DPP6,DEFB4A,PBK,XKR4,PI15,FAM83A,CD274,CCL27,KIAA1045,MELK,MAMDC2,CTSL1,CKS2,OMD,ECM2,TNC,LHX2,SLC25A25,FCN1,SLC16A9,SRGN,C10orf99,HTR7,CEP55,INA,HSPB7,PLA2G2A,ZC3H12A,ADRB1,ADAM12,ELF5,TCN1,MS4A7,FOSL1,MMP10,MMP1,MMP12,HTR3A,TMPRSS4…
STAT5A	197	3399	100.0	1.0E-5	0.86345	5.000000010971202	0.06376281081283715	2906.0	89.06382957399175	493.0	3.599713155574647E-17	0.8637653019572543	ANXA3,SPP1,CENPE,DKK2,TDO2,IL7R,IL31RA,CCNB1,EDIL3,PCSK1,LOX,HBEGF,CD14,GPX3,SERPINB1,TBX18,SGK1,SOD2,AGR3,IL6,INHBA,UPP1,ELN,TFPI2,TAC1,ARPC1B,SERPINE1,NAMPT,TFEC,AKR1B10,DPP6,DEFB4A,PBK,XKR4,PI15,FAM83A,CD274,CCL27,KIAA1045,MELK,MAMDC2,CTSL1,CKS2,OMD,ECM2,TNC,LHX2,SLC25A25,FCN1,SLC16A9,SRGN,C10orf99,HTR7,CEP55,INA,HSPB7,PLA2G2A,ZC3H12A,ADRB1,ADAM12,MKI67,ELF5,TCN1,MS4A7,FOSL1,MMP10,MMP1,MMP12,H…
BCL6	197	2878	100.0	1.0E-5	0.49585	5.000000010971202	0.30464968522877195	2421.0	87.47810359073581	457.0	9.85579649339178E-18	0.5008833072002881	ANXA3,SPP1,CENPE,DKK2,TDO2,IL7R,IL31RA,CCNB1,EDIL3,PCSK1,LOX,HBEGF,CD14,GPX3,SERPINB1,TBX18,SGK1,SOD2,AGR3,IL6,INHBA,UPP1,ELN,TFPI2,TAC1,ARPC1B,SERPINE1,NAMPT,TFEC,AKR1B10,DPP6,DEFB4A,PBK,XKR4,PI15,FAM83A,CD274,CCL27,KIAA1045,MELK,MAMDC2,CTSL1,CKS2,OMD,ECM2,TNC,LHX2,SLC25A25,FCN1,SLC16A9,SRGN,C10orf99,HTR7,CEP55,INA,HSPB7,PLA2G2A,ZC3H12A,ADRB1,ADAM12,MKI67,ELF5,TCN1,MS4A7,FOSL1,MMP10,MMP1,MMP12,H…
CJUN	197	780	96.4467	1.0E-5	0.0688	5.000000010971202	1.162411547015507	632.0	28.656616412400812	148.0	3.7161510665520267E-8	0.07225552128163262	ANXA3,SPP1,CENPE,DKK2,TDO2,IL7R,IL31RA,CCNB1,EDIL3,PCSK1,LOX,HBEGF,CD14,GPX3,SERPINB1,SGK1,SOD2,AGR3,IL6,INHBA,UPP1,ELN,TAC1,ARPC1B,SERPINE1,NAMPT,TFEC,AKR1B10,DPP6,DEFB4A,PBK,XKR4,PI15,FAM83A,CD274,CCL27,KIAA1045,MELK,MAMDC2,CTSL1,CKS2,OMD,TNC,LHX2,SLC25A25,FCN1,SLC16A9,SRGN,C10orf99,HTR7,CEP55,INA,HSPB7,PLA2G2A,ZC3H12A,ADAM12,ELF5,TCN1,MS4A7,FOSL1,MMP10,MMP1,MMP12,HTR3A,TMPRSS4,CD163,MFAP5,GPRC…
AP1	197	5195	96.4467	1.0E-5	0.07127	5.000000010971202	1.1470932627486572	4169.0	195.5524764763521	1026.0	6.0580333231429874E-49	0.07185871121713944	ANXA3,SPP1,CENPE,DKK2,TDO2,IL7R,IL31RA,CCNB1,EDIL3,PCSK1,LOX,HBEGF,CD14,GPX3,SERPINB1,SGK1,SOD2,AGR3,IL6,INHBA,UPP1,ELN,TAC1,ARPC1B,SERPINE1,NAMPT,TFEC,AKR1B10,DPP6,DEFB4A,PBK,XKR4,PI15,FAM83A,CD274,CCL27,KIAA1045,MELK,MAMDC2,CTSL1,CKS2,OMD,TNC,LHX2,SLC25A25,FCN1,SLC16A9,SRGN,C10orf99,HTR7,CEP55,INA,HSPB7,PLA2G2A,ZC3H12A,ADAM12,ELF5,TCN1,MS4A7,FOSL1,MMP10,MMP1,MMP12,HTR3A,TMPRSS4,CD163,MFAP5,GPRC…
CEBPE	197	467	85.786804	1.0E-5	0.00261	5.000000010971202	2.583359478813718	366.0	23.172875531946143	101.0	8.280172414441539E-7	0.002707840767731995	ANXA3,SPP1,CENPE,DKK2,TDO2,IL7R,IL31RA,CCNB1,EDIL3,LOX,HBEGF,CD14,GPX3,SERPINB1,TBX18,SGK1,SOD2,AGR3,IL6,INHBA,UPP1,TFPI2,TAC1,ARPC1B,SERPINE1,TFEC,AKR1B10,DPP6,DEFB4A,PBK,XKR4,PI15,FAM83A,CD274,CCL27,KIAA1045,MELK,MAMDC2,CTSL1,OMD,ECM2,TNC,LHX2,SLC25A25,FCN1,SLC16A9,SRGN,C10orf99,HTR7,CEP55,INA,HSPB7,ZC3H12A,ADAM12,MKI67,ELF5,TCN1,MS4A7,FOSL1,MMP1,MMP12,TMPRSS4,CD163,MFAP5,GPRC5A,GALNT6,NR4A1,KR…
PARP	197	4015	100.0	1.0E-5	0.68373	5.000000010971202	0.16511536020684256	3332.0	120.22879803175277	683.0	9.522833911799885E-28	0.6860418211975701	ANXA3,SPP1,CENPE,DKK2,TDO2,IL7R,IL31RA,CCNB1,EDIL3,PCSK1,LOX,HBEGF,CD14,GPX3,SERPINB1,TBX18,SGK1,SOD2,AGR3,IL6,INHBA,UPP1,ELN,TFPI2,TAC1,ARPC1B,SERPINE1,NAMPT,TFEC,AKR1B10,DPP6,DEFB4A,PBK,XKR4,PI15,FAM83A,CD274,CCL27,KIAA1045,MELK,MAMDC2,CTSL1,CKS2,OMD,ECM2,TNC,LHX2,SLC25A25,FCN1,SLC16A9,SRGN,C10orf99,HTR7,CEP55,INA,HSPB7,PLA2G2A,ZC3H12A,ADRB1,ADAM12,MKI67,ELF5,TCN1,MS4A7,FOSL1,MMP10,MMP1,MMP12,H…
STAT4	197	1299	98.47716	2.0E-5	0.1176	4.6989700153072205	0.929592673109101	1085.0	49.45649803566609	214.0	1.4606758825812024E-9	0.11834231034403811	ANXA3,SPP1,CENPE,DKK2,TDO2,IL7R,IL31RA,CCNB1,EDIL3,PCSK1,LOX,HBEGF,CD14,GPX3,SERPINB1,TBX18,SGK1,SOD2,AGR3,IL6,INHBA,UPP1,ELN,TFPI2,TAC1,SERPINE1,NAMPT,TFEC,AKR1B10,DPP6,DEFB4A,PBK,XKR4,PI15,FAM83A,CD274,CCL27,KIAA1045,MELK,MAMDC2,CTSL1,CKS2,OMD,ECM2,TNC,LHX2,SLC25A25,FCN1,SLC16A9,SRGN,C10orf99,HTR7,CEP55,INA,HSPB7,PLA2G2A,ZC3H12A,ADRB1,ADAM12,MKI67,ELF5,TCN1,MS4A7,FOSL1,MMP10,MMP1,MMP12,HTR3A,TM…
FOXO4	197	1306	98.47716	2.0E-5	0.12274	4.6989700153072205	0.9110138793311362	1100.0	48.61047165538637	206.0	7.207011723907026E-9	0.1238764595763198	ANXA3,SPP1,CENPE,DKK2,TDO2,IL7R,IL31RA,CCNB1,EDIL3,PCSK1,LOX,HBEGF,CD14,GPX3,SERPINB1,TBX18,SGK1,SOD2,AGR3,IL6,INHBA,UPP1,ELN,TFPI2,TAC1,ARPC1B,SERPINE1,NAMPT,TFEC,AKR1B10,DPP6,DEFB4A,PBK,PI15,FAM83A,CD274,CCL27,KIAA1045,MELK,MAMDC2,CTSL1,CKS2,OMD,ECM2,TNC,LHX2,SLC25A25,FCN1,SLC16A9,SRGN,C10orf99,HTR7,CEP55,INA,HSPB7,PLA2G2A,ZC3H12A,ADRB1,ADAM12,MKI67,ELF5,TCN1,MS4A7,FOSL1,MMP10,MMP1,MMP12,HTR3A,…
SPI1	197	5781	100.0	2.0E-5	0.95011	4.6989700153072205	0.02222610254920088	5121.0	147.54567870311854	660.0	4.571210850916491E-17	0.9490511629241751	ANXA3,SPP1,CENPE,DKK2,TDO2,IL7R,IL31RA,CCNB1,EDIL3,PCSK1,LOX,HBEGF,CD14,GPX3,SERPINB1,TBX18,SGK1,SOD2,AGR3,IL6,INHBA,UPP1,ELN,TFPI2,TAC1,ARPC1B,SERPINE1,NAMPT,TFEC,AKR1B10,DPP6,DEFB4A,PBK,XKR4,PI15,FAM83A,CD274,CCL27,KIAA1045,MELK,MAMDC2,CTSL1,CKS2,OMD,ECM2,TNC,LHX2,SLC25A25,FCN1,SLC16A9,SRGN,C10orf99,HTR7,CEP55,INA,HSPB7,PLA2G2A,ZC3H12A,ADRB1,ADAM12,MKI67,ELF5,TCN1,MS4A7,FOSL1,MMP10,MMP1,MMP12,H…
FOXP3	197	933	95.93909	4.0E-5	0.13063	4.397940019643239	0.8839570684107467	777.0	37.08950511678063	156.0	1.9143389721865577E-7	0.1314890959383141	ANXA3,SPP1,CENPE,TDO2,IL7R,IL31RA,CCNB1,EDIL3,PCSK1,HBEGF,CD14,GPX3,SERPINB1,TBX18,SGK1,SOD2,AGR3,IL6,INHBA,UPP1,TFPI2,TAC1,ARPC1B,SERPINE1,NAMPT,TFEC,AKR1B10,DPP6,DEFB4A,PBK,PI15,FAM83A,CD274,CCL27,KIAA1045,MELK,MAMDC2,CTSL1,CKS2,OMD,ECM2,TNC,LHX2,SLC25A25,FCN1,SLC16A9,SRGN,C10orf99,HTR7,CEP55,INA,HSPB7,PLA2G2A,ZC3H12A,ADRB1,ADAM12,MKI67,ELF5,TCN1,MS4A7,FOSL1,MMP10,MMP1,MMP12,HTR3A,TMPRSS4,CD163…
ZTA	197	146	48.730965	6.0E-5	0.00334	4.221848760587558	2.476253526184111	103.0	10.6271176502188	43.0	5.934752434730991E-5	0.0037978269227017325	CENPE,DKK2,IL7R,IL31RA,CCNB1,CD14,SGK1,SOD2,IL6,UPP1,TFPI2,TAC1,NAMPT,TFEC,AKR1B10,DEFB4A,PBK,PI15,FAM83A,CCL27,KIAA1045,TNC,SLC16A9,HTR7,HSPB7,MKI67,ELF5,TCN1,MS4A7,FOSL1,MMP1,MMP12,CD163,LGR5,GPR183,GZMB,SERPINA1,KIAA0101,BCL2A1,RHCG,PRSS36,TPPP3,CALB2,CYBA,CCL2,LEPR,NGF,KRT16,DSC2,DSG3,SERPINB4,SERPINB3,CASP14,PLAUR,IGFL1,KLK6,FPR1,PI3,MMP9,CLDN8,KCNJ15,IL13RA2,TCHH,LCE3D,IVL,SPRR3,SPRR1B,SPRR…
FOXJ1	197	376	74.11167	9.0E-5	0.30333	4.045757483976831	0.5180846288564306	296.0	20.118068500112642	80.0	1.1385583137188963E-5	0.3040946143432283	ANXA3,SPP1,CENPE,DKK2,TDO2,IL7R,IL31RA,CCNB1,EDIL3,PCSK1,CD14,SGK1,SOD2,AGR3,IL6,INHBA,TFPI2,TAC1,ARPC1B,NAMPT,TFEC,PBK,PI15,CD274,CCL27,KIAA1045,CTSL1,OMD,ECM2,TNC,SLC25A25,FCN1,SRGN,HTR7,CEP55,INA,PLA2G2A,ZC3H12A,ADAM12,MKI67,ELF5,TCN1,MS4A7,MMP10,MMP1,MMP12,HTR3A,TMPRSS4,CD163,GPRC5A,NR4A1,KRT6B,KRT6A,KRT77,WIF1,TSPAN8,LGR5,GPR183,ITGBL1,GZMB,CDKN3,DLGAP5,IFI27,SERPINA1,KIAA0101,CILP,BCL2A1,RH…
SRY	197	2346	99.492386	1.3E-4	0.23942	3.8860566465108715	0.6208395794497531	2002.0	90.89034863234201	344.0	1.4227314259277939E-12	0.24031390494126784	ANXA3,SPP1,CENPE,DKK2,TDO2,IL7R,IL31RA,CCNB1,EDIL3,PCSK1,LOX,HBEGF,CD14,GPX3,SERPINB1,TBX18,SGK1,SOD2,AGR3,IL6,INHBA,UPP1,ELN,TFPI2,TAC1,ARPC1B,SERPINE1,NAMPT,TFEC,AKR1B10,DPP6,DEFB4A,PBK,PI15,FAM83A,CD274,CCL27,KIAA1045,MELK,MAMDC2,CTSL1,CKS2,OMD,ECM2,TNC,LHX2,SLC25A25,FCN1,SLC16A9,SRGN,C10orf99,HTR7,CEP55,INA,HSPB7,PLA2G2A,ZC3H12A,ADRB1,ADAM12,MKI67,ELF5,TCN1,MS4A7,FOSL1,MMP10,MMP1,MMP12,HTR3A,…
HNF3	197	1379	95.43147	1.5E-4	0.05974	3.8239087203164384	1.2237347855623553	1162.0	59.37893009788948	217.0	3.697885423718025E-9	0.05920209216064945	ANXA3,SPP1,CENPE,TDO2,IL7R,IL31RA,CCNB1,EDIL3,PCSK1,HBEGF,CD14,GPX3,SERPINB1,TBX18,SGK1,SOD2,AGR3,IL6,INHBA,UPP1,TFPI2,TAC1,ARPC1B,SERPINE1,NAMPT,TFEC,AKR1B10,DPP6,DEFB4A,PBK,PI15,FAM83A,CD274,CCL27,KIAA1045,MELK,MAMDC2,CTSL1,CKS2,OMD,ECM2,TNC,LHX2,SLC25A25,FCN1,SLC16A9,SRGN,C10orf99,HTR7,CEP55,INA,HSPB7,PLA2G2A,ZC3H12A,ADRB1,ADAM12,MKI67,ELF5,TCN1,MS4A7,FOSL1,MMP10,MMP1,MMP12,HTR3A,TMPRSS4,CD163…
CEBPG	197	339	74.619286	1.7E-4	0.00117	3.7695510802990797	2.9318141586777573	259.0	20.530734292370266	80.0	3.3861464074513017E-6	0.001022024963918091	ANXA3,SPP1,CENPE,TDO2,IL7R,IL31RA,CCNB1,EDIL3,LOX,HBEGF,CD14,GPX3,TBX18,SGK1,SOD2,AGR3,IL6,INHBA,TFPI2,TAC1,SERPINE1,TFEC,AKR1B10,DPP6,DEFB4A,PBK,XKR4,PI15,FAM83A,CD274,CCL27,KIAA1045,MAMDC2,CTSL1,OMD,ECM2,TNC,LHX2,FCN1,SRGN,C10orf99,HTR7,CEP55,INA,ZC3H12A,ADAM12,ELF5,TCN1,MS4A7,FOSL1,MMP10,MMP12,CD163,MFAP5,GPRC5A,GALNT6,NR4A1,KRT6B,KRT6A,KRT77,WIF1,TSPAN8,LGR5,GPR183,ITGBL1,GZMB,CDKN3,DLGAP5,CI…
SOX8	197	829	93.40102	2.1E-4	0.08837	3.677780708713691	1.0536951312155172	685.0	38.270483226465736	144.0	2.8438994629171294E-7	0.08815254308312272	ANXA3,SPP1,CENPE,DKK2,TDO2,IL7R,IL31RA,CCNB1,EDIL3,PCSK1,HBEGF,CD14,GPX3,SERPINB1,TBX18,SGK1,SOD2,AGR3,IL6,INHBA,UPP1,ELN,TFPI2,TAC1,ARPC1B,SERPINE1,NAMPT,TFEC,AKR1B10,DPP6,DEFB4A,PBK,XKR4,PI15,CD274,CCL27,KIAA1045,MELK,MAMDC2,CTSL1,CKS2,OMD,ECM2,TNC,SLC25A25,FCN1,SLC16A9,SRGN,C10orf99,HTR7,CEP55,INA,HSPB7,PLA2G2A,ZC3H12A,ADAM12,MKI67,ELF5,TCN1,MS4A7,FOSL1,MMP10,MMP1,MMP12,HTR3A,TMPRSS4,CD163,MFA…
TCF11	197	524	88.324875	2.2E-4	0.12533	3.657577315785776	0.9019449564642815	436.0	24.268598713358056	88.0	5.959842216014728E-5	0.12718413116579091	ANXA3,SPP1,CENPE,TDO2,IL7R,IL31RA,CCNB1,PCSK1,HBEGF,CD14,GPX3,SERPINB1,TBX18,SGK1,SOD2,AGR3,IL6,INHBA,UPP1,TFPI2,TAC1,NAMPT,TFEC,AKR1B10,DPP6,DEFB4A,PBK,XKR4,PI15,FAM83A,CD274,CCL27,KIAA1045,MELK,MAMDC2,CTSL1,CKS2,OMD,ECM2,TNC,LHX2,SLC25A25,FCN1,SLC16A9,SRGN,C10orf99,HTR7,CEP55,HSPB7,PLA2G2A,ZC3H12A,ADRB1,ADAM12,MKI67,ELF5,TCN1,MS4A7,FOSL1,MMP10,MMP1,MMP12,HTR3A,TMPRSS4,CD163,MFAP5,GPRC5A,GALNT6,…
HOXA13	197	1700	96.4467	2.4E-4	0.03396	3.6197887692595954	1.4690323225137383	1389.0	81.56312296239989	311.0	1.624915360197617E-14	0.03516722071026861	ANXA3,SPP1,CENPE,DKK2,TDO2,IL7R,IL31RA,EDIL3,PCSK1,LOX,HBEGF,CD14,GPX3,TBX18,SGK1,SOD2,AGR3,IL6,INHBA,UPP1,ELN,TFPI2,TAC1,SERPINE1,NAMPT,TFEC,AKR1B10,DPP6,DEFB4A,PBK,XKR4,PI15,FAM83A,CD274,CCL27,KIAA1045,MELK,MAMDC2,CTSL1,CKS2,OMD,ECM2,TNC,LHX2,SLC25A25,FCN1,SLC16A9,SRGN,C10orf99,HTR7,CEP55,INA,HSPB7,PLA2G2A,ZC3H12A,ADRB1,ADAM12,MKI67,ELF5,TCN1,MS4A7,FOSL1,MMP10,MMP1,MMP12,HTR3A,TMPRSS4,CD163,MFA…
PIT1	197	844	93.40102	2.5E-4	0.1051	3.6020599707000818	0.9783972905232969	699.0	39.29759405752888	145.0	3.2513035765994303E-7	0.10698657782562572	ANXA3,SPP1,CENPE,DKK2,TDO2,IL7R,IL31RA,CCNB1,EDIL3,PCSK1,LOX,HBEGF,CD14,GPX3,SERPINB1,TBX18,SGK1,SOD2,AGR3,IL6,INHBA,UPP1,TFPI2,TAC1,ARPC1B,SERPINE1,NAMPT,TFEC,AKR1B10,DPP6,DEFB4A,PBK,XKR4,PI15,CD274,CCL27,KIAA1045,MELK,CTSL1,OMD,ECM2,TNC,LHX2,SLC25A25,FCN1,SLC16A9,SRGN,C10orf99,HTR7,CEP55,INA,HSPB7,PLA2G2A,ZC3H12A,ADAM12,MKI67,ELF5,TCN1,MS4A7,FOSL1,MMP10,MMP1,MMP12,HTR3A,TMPRSS4,CD163,MFAP5,GPRC…
FOXO3	197	422	81.21828	2.6E-4	0.01902	3.58502665084689	1.72078947660598	337.0	22.468503683065105	85.0	1.3129356706713787E-5	0.019462879558938474	ANXA3,SPP1,CENPE,TDO2,IL7R,IL31RA,CCNB1,EDIL3,PCSK1,LOX,CD14,SERPINB1,SGK1,SOD2,AGR3,IL6,INHBA,UPP1,TFPI2,TAC1,SERPINE1,NAMPT,TFEC,AKR1B10,DPP6,DEFB4A,PBK,PI15,FAM83A,CD274,CCL27,KIAA1045,MELK,MAMDC2,CTSL1,CKS2,OMD,ECM2,TNC,LHX2,SLC16A9,SRGN,C10orf99,HTR7,CEP55,INA,HSPB7,PLA2G2A,ZC3H12A,ADRB1,ADAM12,MKI67,ELF5,TCN1,MS4A7,MMP10,MMP1,MMP12,HTR3A,CD163,GPRC5A,NR4A1,KRT6B,KRT6A,KRT77,TSPAN8,LGR5,GJB6…
GEN	197	3473	99.492386	2.6E-4	0.65242	3.58502665084689	0.1854727445110535	3065.0	115.13706986392634	408.0	1.63859643514362E-11	0.6520244099747234	ANXA3,SPP1,CENPE,DKK2,TDO2,IL7R,IL31RA,CCNB1,EDIL3,PCSK1,LOX,HBEGF,CD14,GPX3,SERPINB1,TBX18,SGK1,SOD2,AGR3,IL6,INHBA,UPP1,ELN,TFPI2,TAC1,SERPINE1,NAMPT,TFEC,AKR1B10,DPP6,DEFB4A,PBK,XKR4,PI15,FAM83A,CD274,CCL27,KIAA1045,MELK,MAMDC2,CTSL1,CKS2,OMD,ECM2,TNC,LHX2,SLC25A25,FCN1,SLC16A9,SRGN,C10orf99,HTR7,CEP55,INA,HSPB7,PLA2G2A,ZC3H12A,ADRB1,ADAM12,MKI67,ELF5,TCN1,MS4A7,FOSL1,MMP10,MMP1,MMP12,HTR3A,TM…
MTATA	197	124	46.70051	2.9E-4	1.0E-5	3.5376020076241277	5.000000010971202	85.0	10.318081845842428	39.0	8.016862478087749E-5	1.354370200596506E-5	ANXA3,DKK2,IL7R,HBEGF,TBX18,SGK1,AGR3,INHBA,TAC1,NAMPT,AKR1B10,DEFB4A,PBK,PI15,CD274,KIAA1045,MAMDC2,CKS2,OMD,TNC,SRGN,C10orf99,HSPB7,ZC3H12A,ADRB1,ELF5,TCN1,MS4A7,MMP10,MMP1,MMP12,CD163,MFAP5,GPRC5A,NR4A1,KRT6A,KRT77,TSPAN8,GPR183,ITGBL1,CDKN3,DLGAP5,KIAA0101,RHCG,PRSS27,IL21R,PRSS36,CDH3,HAS3,CCL2,RAD54L,CCL18,KRT16,FPR1,UBE2S,SAMSN1,KCNJ15,IL13RA2,IL13RA1,TCHH,LCE3D,IVL,SPRR4,SPRR3,SPRR2B,S100…
FKHL5	197	357	74.11167	3.1E-4	0.11489	3.5086383018470504	0.9397177640817129	283.0	20.034555979885035	74.0	3.248990631831419E-5	0.11719130506957073	ANXA3,SPP1,CENPE,TDO2,IL7R,IL31RA,CCNB1,EDIL3,PCSK1,SERPINB1,SGK1,SOD2,AGR3,IL6,INHBA,UPP1,TFPI2,TAC1,ARPC1B,NAMPT,TFEC,AKR1B10,DPP6,PBK,PI15,FAM83A,KIAA1045,MELK,CTSL1,CKS2,OMD,ECM2,TNC,SLC25A25,FCN1,SRGN,C10orf99,HTR7,CEP55,INA,HSPB7,PLA2G2A,ZC3H12A,ADRB1,ADAM12,MKI67,ELF5,TCN1,MMP10,MMP1,MMP12,HTR3A,CD163,GPRC5A,NR4A1,KRT6B,KRT6A,KRT77,WIF1,TSPAN8,LGR5,GPR183,ITGBL1,GZMB,CDKN3,DLGAP5,IFI27,SER…
RELA	197	42	15.736041	4.4E-4	0.00576	3.356547320121795	2.2395775099929436	22.0	5.184443557835567	20.0	1.8170673473888522E-4	0.005913517566869981	LOX,SERPINB1,AGR3,TFPI2,OMD,TNC,SLC25A25,ADAM12,GALNT6,KRT6B,KRT77,GJB6,GPR183,DLGAP5,BCL2A1,RHCG,CCL18,IGFL1,LILRB2,LILRB1,PI3,MMP9,KIF4A,TCHH,SPRR4,S100A9,PTGS2,TMPRSS11D,IL8,CXCL5,CXCL2
CDX2	197	2614	96.4467	5.4E-4	0.03263	3.2676062569999154	1.4863829227056593	2163.0	124.1080502831612	451.0	5.808208424865745E-19	0.033920185728850784	ANXA3,SPP1,CENPE,DKK2,TDO2,IL7R,IL31RA,EDIL3,PCSK1,LOX,HBEGF,CD14,GPX3,TBX18,SGK1,SOD2,AGR3,IL6,INHBA,UPP1,ELN,TFPI2,TAC1,SERPINE1,NAMPT,TFEC,AKR1B10,DPP6,DEFB4A,PBK,XKR4,PI15,FAM83A,CD274,CCL27,KIAA1045,MELK,MAMDC2,CTSL1,CKS2,OMD,ECM2,TNC,LHX2,SLC25A25,FCN1,SLC16A9,SRGN,C10orf99,HTR7,CEP55,INA,HSPB7,PLA2G2A,ZC3H12A,ADRB1,ADAM12,MKI67,ELF5,TCN1,MS4A7,FOSL1,MMP10,MMP1,MMP12,HTR3A,TMPRSS4,CD163,MFA…
CDX1	197	1290	96.4467	6.7E-4	0.03321	3.1739252106285156	1.4787311484558456	1072.0	61.84564281185075	218.0	7.216596806217238E-10	0.033920185728850784	ANXA3,SPP1,CENPE,DKK2,TDO2,IL7R,IL31RA,EDIL3,PCSK1,LOX,HBEGF,CD14,GPX3,TBX18,SGK1,SOD2,AGR3,IL6,INHBA,UPP1,ELN,TFPI2,TAC1,SERPINE1,NAMPT,TFEC,AKR1B10,DPP6,DEFB4A,PBK,XKR4,PI15,FAM83A,CD274,CCL27,KIAA1045,MELK,MAMDC2,CTSL1,CKS2,OMD,ECM2,TNC,LHX2,SLC25A25,FCN1,SLC16A9,SRGN,C10orf99,HTR7,CEP55,INA,HSPB7,PLA2G2A,ZC3H12A,ADRB1,ADAM12,MKI67,ELF5,TCN1,MS4A7,FOSL1,MMP10,MMP1,MMP12,HTR3A,TMPRSS4,CD163,MFA…
JUND	197	196	67.51269	6.8E-4	1.0E-5	3.167491088971117	5.000000010971202	151.0	13.240804359722407	45.0	4.96269873866345E-4	3.546289333634779E-6	ANXA3,SPP1,CENPE,DKK2,TDO2,IL7R,IL31RA,EDIL3,PCSK1,LOX,HBEGF,CD14,GPX3,SERPINB1,SGK1,SOD2,IL6,UPP1,TAC1,NAMPT,TFEC,AKR1B10,DPP6,DEFB4A,PI15,FAM83A,CD274,CCL27,KIAA1045,MELK,CKS2,OMD,TNC,LHX2,SLC25A25,SLC16A9,C10orf99,HTR7,INA,HSPB7,ZC3H12A,ADAM12,ELF5,MS4A7,FOSL1,MMP10,MMP1,MMP12,HTR3A,CD163,GPRC5A,NR4A1,KRT6B,KRT6A,WIF1,LGR5,GJB6,GPR183,GZMB,CDKN3,DLGAP5,IFI27,BCL2A1,RHCG,PRSS27,TNFRSF12A,IL21R,…
FREAC2	197	198	52.791878	6.9E-4	0.18279	3.161150899625849	0.7380475760266877	151.0	13.79338239011737	47.0	2.527207021377068E-4	0.1835843020327055	ANXA3,CENPE,TDO2,IL7R,IL31RA,CCNB1,EDIL3,PCSK1,SGK1,SOD2,AGR3,IL6,INHBA,TAC1,ARPC1B,NAMPT,TFEC,PBK,PI15,KIAA1045,CTSL1,OMD,ECM2,TNC,SRGN,HTR7,CEP55,PLA2G2A,ZC3H12A,ADAM12,MKI67,ELF5,TCN1,MMP10,MMP1,MMP12,HTR3A,CD163,GPRC5A,NR4A1,KRT6B,KRT6A,KRT77,TSPAN8,GPR183,ITGBL1,GZMB,CDKN3,DLGAP5,IFI27,KIAA0101,CILP,RHCG,TNFRSF12A,IL21R,CDH3,CALB2,CCL2,CHI3L2,BIRC5,CASP14,CEACAM1,IGFL1,SAMSN1,CLDN8,KCNJ15,IT…
SFPI1	197	36	17.258883	7.0E-4	4.1E-4	3.1549019754710996	3.3872161349837326	19.0	4.493291047497076	17.0	7.018211093018546E-4	3.7863075660621743E-4	IL31RA,EDIL3,HBEGF,CD14,TBX18,AGR3,INHBA,UPP1,CD274,CCL27,CTSL1,TNC,SLC25A25,SRGN,PLA2G2A,ADRB1,ELF5,TMPRSS4,KIAA0101,BCL2A1,TNFRSF12A,LEPR,SOCS3,C5AR1,LILRB2,CLDN8,LCE3D,S100A8,IL20,SPC25,KY,CXCL5,CXCL2,BTC
ELF1	197	2190	100.0	7.4E-4	0.6359	3.130768286970079	0.1966111609478372	1980.0	63.43313524537158	210.0	1.63262547937835E-5	0.6375195243118359	ANXA3,SPP1,CENPE,DKK2,TDO2,IL7R,IL31RA,CCNB1,EDIL3,PCSK1,LOX,HBEGF,CD14,GPX3,SERPINB1,TBX18,SGK1,SOD2,AGR3,IL6,INHBA,UPP1,ELN,TFPI2,TAC1,ARPC1B,SERPINE1,NAMPT,TFEC,AKR1B10,DPP6,DEFB4A,PBK,XKR4,PI15,FAM83A,CD274,CCL27,KIAA1045,MELK,MAMDC2,CTSL1,CKS2,OMD,ECM2,TNC,LHX2,SLC25A25,FCN1,SLC16A9,SRGN,C10orf99,HTR7,CEP55,INA,HSPB7,PLA2G2A,ZC3H12A,ADRB1,ADAM12,MKI67,ELF5,TCN1,MS4A7,FOSL1,MMP10,MMP1,MMP12,H…
MEF2C	197	1512	95.93909	7.6E-4	0.25872	3.119186393743766	0.5871699797801463	1274.0	70.15729597241975	238.0	7.152411777636541E-10	0.25992091926065714	ANXA3,SPP1,CENPE,DKK2,TDO2,IL7R,IL31RA,CCNB1,EDIL3,PCSK1,LOX,HBEGF,CD14,GPX3,SERPINB1,TBX18,SGK1,SOD2,AGR3,IL6,INHBA,UPP1,TFPI2,TAC1,ARPC1B,SERPINE1,NAMPT,TFEC,AKR1B10,DPP6,DEFB4A,PBK,XKR4,PI15,FAM83A,CD274,CCL27,KIAA1045,MELK,MAMDC2,CTSL1,CKS2,OMD,ECM2,TNC,LHX2,SLC25A25,FCN1,SLC16A9,SRGN,C10orf99,HTR7,CEP55,INA,HSPB7,PLA2G2A,ZC3H12A,ADRB1,MKI67,ELF5,TCN1,MS4A7,FOSL1,MMP10,MMP1,MMP12,HTR3A,TMPRSS…
JUNB	197	196	67.51269	7.6E-4	1.0E-5	3.119186393743766	5.000000010971202	151.0	13.146848294064418	45.0	4.96269873866345E-4	3.546289333634779E-6	ANXA3,SPP1,CENPE,DKK2,TDO2,IL7R,IL31RA,EDIL3,PCSK1,LOX,HBEGF,CD14,GPX3,SERPINB1,SGK1,SOD2,IL6,UPP1,TAC1,NAMPT,TFEC,AKR1B10,DPP6,DEFB4A,PI15,FAM83A,CD274,CCL27,KIAA1045,MELK,CKS2,OMD,TNC,LHX2,SLC25A25,SLC16A9,C10orf99,HTR7,INA,HSPB7,ZC3H12A,ADAM12,ELF5,MS4A7,FOSL1,MMP10,MMP1,MMP12,HTR3A,CD163,GPRC5A,NR4A1,KRT6B,KRT6A,WIF1,LGR5,GJB6,GPR183,GZMB,CDKN3,DLGAP5,IFI27,BCL2A1,RHCG,PRSS27,TNFRSF12A,IL21R,…
CEBP	197	1549	100.0	7.7E-4	0.35935	3.113509283746831	0.4444823558209064	1397.0	46.55615906063948	152.0	1.5536511438579633E-4	0.3616922280339392	ANXA3,SPP1,CENPE,DKK2,TDO2,IL7R,IL31RA,CCNB1,EDIL3,PCSK1,LOX,HBEGF,CD14,GPX3,SERPINB1,TBX18,SGK1,SOD2,AGR3,IL6,INHBA,UPP1,ELN,TFPI2,TAC1,ARPC1B,SERPINE1,NAMPT,TFEC,AKR1B10,DPP6,DEFB4A,PBK,XKR4,PI15,FAM83A,CD274,CCL27,KIAA1045,MELK,MAMDC2,CTSL1,CKS2,OMD,ECM2,TNC,LHX2,SLC25A25,FCN1,SLC16A9,SRGN,C10orf99,HTR7,CEP55,INA,HSPB7,PLA2G2A,ZC3H12A,ADRB1,ADAM12,MKI67,ELF5,TCN1,MS4A7,FOSL1,MMP10,MMP1,MMP12,H…
MEF2D	197	1511	95.93909	8.1E-4	0.25872	3.0915149823397483	0.5871699797801463	1275.0	70.11665351961749	236.0	8.418692465943979E-10	0.25992091926065714	ANXA3,SPP1,CENPE,DKK2,TDO2,IL7R,IL31RA,CCNB1,EDIL3,PCSK1,LOX,HBEGF,CD14,GPX3,SERPINB1,TBX18,SGK1,SOD2,AGR3,IL6,INHBA,UPP1,TFPI2,TAC1,ARPC1B,SERPINE1,NAMPT,TFEC,AKR1B10,DPP6,DEFB4A,PBK,XKR4,PI15,FAM83A,CD274,CCL27,KIAA1045,MELK,MAMDC2,CTSL1,CKS2,OMD,ECM2,TNC,LHX2,SLC25A25,FCN1,SLC16A9,SRGN,C10orf99,HTR7,CEP55,INA,HSPB7,PLA2G2A,ZC3H12A,ADRB1,MKI67,ELF5,TCN1,MS4A7,FOSL1,MMP10,MMP1,MMP12,HTR3A,TMPRSS…
SATB1	197	1305	96.4467	8.4E-4	0.04559	3.0757207173857286	1.3411304233784498	1086.0	62.83056489859038	219.0	8.295469840176121E-10	0.046984660245440485	ANXA3,SPP1,CENPE,DKK2,TDO2,IL7R,IL31RA,EDIL3,PCSK1,LOX,HBEGF,CD14,GPX3,TBX18,SGK1,SOD2,AGR3,IL6,INHBA,UPP1,ELN,TFPI2,TAC1,SERPINE1,NAMPT,TFEC,AKR1B10,DPP6,DEFB4A,PBK,XKR4,PI15,FAM83A,CD274,CCL27,KIAA1045,MELK,MAMDC2,CTSL1,CKS2,OMD,ECM2,TNC,LHX2,SLC25A25,FCN1,SLC16A9,SRGN,C10orf99,HTR7,CEP55,INA,HSPB7,PLA2G2A,ZC3H12A,ADRB1,ADAM12,MKI67,ELF5,TCN1,MS4A7,FOSL1,MMP10,MMP1,MMP12,HTR3A,TMPRSS4,CD163,MFA…
HOXD9	197	190	58.375633	8.7E-4	4.1E-4	3.060480752904465	3.3872161349837326	143.0	13.951418142536154	47.0	2.2509280859933195E-4	4.329159206157294E-4	CENPE,DKK2,TDO2,IL7R,IL31RA,LOX,HBEGF,CD14,SGK1,SOD2,AGR3,INHBA,TFPI2,TAC1,NAMPT,TFEC,DPP6,DEFB4A,PBK,PI15,CCL27,KIAA1045,CTSL1,CKS2,OMD,ECM2,TNC,FCN1,SLC16A9,SRGN,C10orf99,CEP55,PLA2G2A,ADRB1,TCN1,MS4A7,FOSL1,MMP10,MMP1,CD163,MFAP5,KRT6B,KRT6A,WIF1,TSPAN8,GJB2,GJB6,GPR183,ITGBL1,GZMB,DLGAP5,IFI27,SERPINA1,KIAA0101,CILP,RHCG,PRSS27,TNFRSF12A,CARHSP1,IL21R,TPPP3,CDH3,NGF,CCL18,BIRC5,DSC2,DSG3,SERP…
HNF3A	197	239	67.51269	9.8E-4	0.0096	3.008773919156726	2.0177287463325513	190.0	14.849055549627636	49.0	6.19231461386327E-4	0.009634440305388214	TDO2,IL31RA,CCNB1,EDIL3,PCSK1,CD14,SERPINB1,SGK1,SOD2,AGR3,INHBA,UPP1,TFPI2,SERPINE1,TFEC,AKR1B10,DPP6,PBK,FAM83A,CD274,CCL27,MELK,MAMDC2,CTSL1,OMD,ECM2,LHX2,FCN1,SLC16A9,SRGN,C10orf99,HSPB7,PLA2G2A,ZC3H12A,ADRB1,ADAM12,MKI67,ELF5,TCN1,MS4A7,FOSL1,MMP10,MMP1,MMP12,HTR3A,CD163,GPRC5A,KRT6B,KRT77,TSPAN8,LGR5,GJB6,GPR183,ITGBL1,GZMB,DLGAP5,IFI27,KIAA0101,CILP,BCL2A1,RHCG,PRSS27,CARHSP1,TPPP3,CCL2,RA…
GFI1	197	1884	94.416245	0.0011	0.05554	2.9586073171950447	1.2553941311761032	1618.0	84.88217344067326	266.0	1.0428649109749852E-9	0.05774369730587929	ANXA3,SPP1,CENPE,DKK2,TDO2,IL7R,IL31RA,CCNB1,EDIL3,PCSK1,LOX,HBEGF,CD14,GPX3,SERPINB1,TBX18,SOD2,AGR3,IL6,INHBA,UPP1,ELN,TFPI2,TAC1,ARPC1B,SERPINE1,NAMPT,TFEC,AKR1B10,DPP6,DEFB4A,PBK,XKR4,PI15,FAM83A,CD274,CCL27,KIAA1045,MELK,MAMDC2,CTSL1,CKS2,OMD,ECM2,TNC,LHX2,SLC25A25,FCN1,SRGN,C10orf99,HTR7,CEP55,INA,HSPB7,PLA2G2A,ZC3H12A,ADRB1,ADAM12,MKI67,ELF5,TCN1,MS4A7,FOSL1,MMP10,MMP1,MMP12,HTR3A,TMPRSS4,…
AR	197	1213	98.98477	0.00114	0.84062	2.9430951679502773	0.07540029115620617	1094.0	38.0641765747045	119.0	7.441326331997697E-4	0.8412629044918803	ANXA3,SPP1,CENPE,DKK2,TDO2,IL7R,IL31RA,CCNB1,EDIL3,PCSK1,LOX,HBEGF,CD14,GPX3,SERPINB1,TBX18,SGK1,SOD2,AGR3,IL6,INHBA,UPP1,ELN,TFPI2,TAC1,ARPC1B,SERPINE1,NAMPT,TFEC,AKR1B10,DPP6,DEFB4A,PBK,XKR4,PI15,FAM83A,CD274,CCL27,KIAA1045,MELK,MAMDC2,CTSL1,CKS2,OMD,ECM2,TNC,LHX2,SLC25A25,FCN1,SLC16A9,SRGN,C10orf99,HTR7,CEP55,INA,HSPB7,PLA2G2A,ZC3H12A,ADRB1,ADAM12,MKI67,ELF5,TCN1,MS4A7,FOSL1,MMP10,MMP1,MMP12,H…
ELF5	197	5081	100.0	0.00117	0.96894	2.9318141586777573	0.013703106292589797	4679.0	129.71197776264805	402.0	1.577385771021753E-7	0.969113177316069	ANXA3,SPP1,CENPE,DKK2,TDO2,IL7R,IL31RA,CCNB1,EDIL3,PCSK1,LOX,HBEGF,CD14,GPX3,SERPINB1,TBX18,SGK1,SOD2,AGR3,IL6,INHBA,UPP1,ELN,TFPI2,TAC1,ARPC1B,SERPINE1,NAMPT,TFEC,AKR1B10,DPP6,DEFB4A,PBK,XKR4,PI15,FAM83A,CD274,CCL27,KIAA1045,MELK,MAMDC2,CTSL1,CKS2,OMD,ECM2,TNC,LHX2,SLC25A25,FCN1,SLC16A9,SRGN,C10orf99,HTR7,CEP55,INA,HSPB7,PLA2G2A,ZC3H12A,ADRB1,ADAM12,MKI67,ELF5,TCN1,MS4A7,FOSL1,MMP10,MMP1,MMP12,H…
TEF	197	122	43.654823	0.00133	0.02128	2.8761483593126966	1.672028376656772	91.0	9.72737944643779	31.0	0.001542315221302907	0.02254469961924298	ANXA3,IL31RA,GPX3,SERPINB1,SGK1,SOD2,UPP1,ELN,TAC1,TFEC,AKR1B10,DPP6,XKR4,PI15,CD274,MAMDC2,CKS2,OMD,TNC,C10orf99,HSPB7,PLA2G2A,TCN1,MMP10,MMP1,MFAP5,GALNT6,NR4A1,KRT6A,TSPAN8,GJB2,GJB6,GPR183,GZMB,DLGAP5,IFI27,SERPINA1,CILP,BCL2A1,RHCG,TPPP3,CALB2,CCL2,NGF,KRT17,SOCS3,NDC80,SERPINB4,SERPINB3,UHRF1,CEACAM1,PLAUR,C5AR1,KLK6,SAMSN1,CLDN8,ITGB2,IL13RA2,IL13RA1,LCE3D,IVL,SPRR1B,SPRR2B,S100A12,S100A8,…
TATA	197	692	85.786804	0.00135	0.00153	2.869666220239804	2.815308566729156	538.0	40.9495939238465	154.0	8.415631905513197E-10	0.0014680699697891368	ANXA3,SPP1,CENPE,DKK2,TDO2,IL7R,IL31RA,CCNB1,EDIL3,PCSK1,LOX,HBEGF,SERPINB1,TBX18,SGK1,SOD2,AGR3,IL6,INHBA,UPP1,TFPI2,TAC1,SERPINE1,NAMPT,TFEC,AKR1B10,DPP6,DEFB4A,PBK,PI15,FAM83A,CD274,KIAA1045,MAMDC2,CTSL1,CKS2,OMD,ECM2,TNC,LHX2,FCN1,SLC16A9,SRGN,C10orf99,HTR7,CEP55,INA,HSPB7,PLA2G2A,ZC3H12A,ADRB1,MKI67,ELF5,TCN1,MS4A7,FOSL1,MMP10,MMP1,MMP12,CD163,MFAP5,GPRC5A,NR4A1,KRT6B,KRT6A,KRT77,WIF1,TSPAN8…
RSRFC4	197	47	11.167513	0.00136	0.00857	2.866461093307136	2.0670191984502977	23.0	6.7436536786446215	24.0	1.001651941269502E-5	0.008222833062533491	ANXA3,HBEGF,GPX3,TBX18,INHBA,TAC1,PBK,ECM2,SRGN,HSPB7,MMP1,NR4A1,KRT77,IL21R,PRSS36,CYBA,LCE3D,IVL,G0S2,ITGB6,KY,IL8
FAC1	197	132	47.208122	0.00153	0.00374	2.815308566729156	2.4271283893381304	98.0	10.524029911852923	34.0	0.0010124977709873861	0.0037563582233916784	CENPE,TDO2,IL31RA,CCNB1,PCSK1,CD14,SOD2,AGR3,IL6,INHBA,TFPI2,TAC1,ARPC1B,TFEC,PI15,CD274,KIAA1045,ECM2,SLC25A25,FCN1,SRGN,HTR7,PLA2G2A,MKI67,TCN1,MS4A7,MMP10,MMP1,MMP12,HTR3A,TMPRSS4,CD163,KRT6B,KRT6A,ITGBL1,GZMB,CDKN3,KIAA0101,BCL2A1,RHCG,TNFRSF12A,IL21R,PRSS36,CALB2,CHI3L2,CCL18,NDC80,DSC2,DSG3,SERPINB4,SERPINB3,CEACAM1,PLAUR,C5AR1,FPR1,LILRB2,PI3,MMP9,KCNJ15,ITGB2,IL13RA2,IL13RA1,TCHH,LCE3D,SP…
HOXB9	197	189	56.85279	0.00161	0.0048	2.7931741143312547	2.318758741996532	146.0	13.79085239062253	43.0	6.014866456479744E-4	0.005168320719207724	ANXA3,SPP1,CENPE,DKK2,TDO2,IL7R,IL31RA,LOX,HBEGF,CD14,TBX18,SGK1,AGR3,IL6,INHBA,UPP1,TFPI2,TAC1,TFEC,PBK,PI15,CD274,CTSL1,CKS2,OMD,TNC,LHX2,SLC16A9,SRGN,C10orf99,HTR7,INA,PLA2G2A,ZC3H12A,ADRB1,TCN1,FOSL1,MMP10,MMP1,MMP12,CD163,MFAP5,GPRC5A,KRT6B,KRT6A,WIF1,TSPAN8,GJB2,GJB6,GPR183,GZMB,CDKN3,DLGAP5,IFI27,KIAA0101,CILP,RHCG,PRSS27,TNFRSF12A,CARHSP1,IL21R,TPPP3,CDH3,CCL2,CHI3L2,CCL18,SOCS3,DSC2,DSG3…
ETS	197	2626	100.0	0.00163	0.90919	2.7878124075365407	0.04134535006764728	2408.0	72.1324998142484	218.0	5.241986998427602E-5	0.9101584065814401	ANXA3,SPP1,CENPE,DKK2,TDO2,IL7R,IL31RA,CCNB1,EDIL3,PCSK1,LOX,HBEGF,CD14,GPX3,SERPINB1,TBX18,SGK1,SOD2,AGR3,IL6,INHBA,UPP1,ELN,TFPI2,TAC1,ARPC1B,SERPINE1,NAMPT,TFEC,AKR1B10,DPP6,DEFB4A,PBK,XKR4,PI15,FAM83A,CD274,CCL27,KIAA1045,MELK,MAMDC2,CTSL1,CKS2,OMD,ECM2,TNC,LHX2,SLC25A25,FCN1,SLC16A9,SRGN,C10orf99,HTR7,CEP55,INA,HSPB7,PLA2G2A,ZC3H12A,ADRB1,ADAM12,MKI67,ELF5,TCN1,MS4A7,FOSL1,MMP10,MMP1,MMP12,H…
JUNDM2	197	96	35.532993	0.00168	8.2E-4	2.7746907217217474	3.086186139319752	66.0	9.316264701585672	30.0	6.234553594421346E-4	8.946760347781072E-4	CENPE,DKK2,IL7R,IL31RA,CD14,SGK1,SOD2,AGR3,IL6,UPP1,TAC1,AKR1B10,DEFB4A,PBK,PI15,FAM83A,CCL27,KIAA1045,TNC,SLC25A25,HTR7,HSPB7,ADRB1,ELF5,FOSL1,MMP1,MMP12,HTR3A,GPRC5A,LGR5,GPR183,GZMB,PRSS27,PRSS36,TPPP3,CALB2,CCL2,NGF,KRT16,NDC80,DSC2,CASP14,PLAUR,IGFL1,KLK6,FPR1,UBE2S,MMP9,CLDN8,KCNJ15,TCHH,LCE3D,IVL,SPRR3,SPRR1B,SPRR2B,S100A2,SELL,SELE,TNNT2,IL20,RRM2,NR4A2,CLEC3B,KY,EPHB1,ARL14,S100P,IL8,AREG
MEF2A	197	1133	92.38579	0.00169	0.25531	2.7721133091621804	0.5929321761054375	959.0	56.73147273103115	174.0	1.6443185676356807E-7	0.25688618725090473	ANXA3,SPP1,CENPE,DKK2,TDO2,IL7R,IL31RA,CCNB1,EDIL3,PCSK1,LOX,HBEGF,CD14,GPX3,SERPINB1,TBX18,SOD2,AGR3,IL6,INHBA,UPP1,TFPI2,TAC1,SERPINE1,NAMPT,TFEC,AKR1B10,DPP6,DEFB4A,PBK,XKR4,PI15,FAM83A,CD274,CCL27,KIAA1045,MELK,MAMDC2,CTSL1,CKS2,OMD,ECM2,TNC,LHX2,FCN1,SLC16A9,SRGN,C10orf99,HTR7,CEP55,INA,HSPB7,PLA2G2A,ZC3H12A,ADRB1,MKI67,ELF5,TCN1,MS4A7,FOSL1,MMP10,MMP1,MMP12,HTR3A,TMPRSS4,CD163,MFAP5,GPRC5A,…
HMGIY	197	5668	100.0	0.0017	0.87345	2.7695510728640014	0.058761960177706636	5090.0	194.33620193381188	578.0	2.354660051747507E-13	0.8728517419746094	ANXA3,SPP1,CENPE,DKK2,TDO2,IL7R,IL31RA,CCNB1,EDIL3,PCSK1,LOX,HBEGF,CD14,GPX3,SERPINB1,TBX18,SGK1,SOD2,AGR3,IL6,INHBA,UPP1,ELN,TFPI2,TAC1,ARPC1B,SERPINE1,NAMPT,TFEC,AKR1B10,DPP6,DEFB4A,PBK,XKR4,PI15,FAM83A,CD274,CCL27,KIAA1045,MELK,MAMDC2,CTSL1,CKS2,OMD,ECM2,TNC,LHX2,SLC25A25,FCN1,SLC16A9,SRGN,C10orf99,HTR7,CEP55,INA,HSPB7,PLA2G2A,ZC3H12A,ADRB1,ADAM12,MKI67,ELF5,TCN1,MS4A7,FOSL1,MMP10,MMP1,MMP12,H…
SOX17	197	2439	98.98477	0.00219	0.95575	2.6595559026240454	0.019655698509149763	2193.0	83.96798637098277	246.0	1.5837099990602968E-6	0.9551588524983152	ANXA3,SPP1,CENPE,DKK2,TDO2,IL7R,IL31RA,CCNB1,EDIL3,PCSK1,LOX,HBEGF,CD14,GPX3,SERPINB1,TBX18,SGK1,SOD2,AGR3,IL6,INHBA,UPP1,ELN,TFPI2,TAC1,ARPC1B,SERPINE1,NAMPT,TFEC,AKR1B10,DPP6,DEFB4A,PBK,PI15,FAM83A,CD274,CCL27,KIAA1045,MELK,MAMDC2,CTSL1,CKS2,OMD,ECM2,TNC,LHX2,SLC25A25,FCN1,SLC16A9,SRGN,C10orf99,HTR7,CEP55,INA,HSPB7,PLA2G2A,ZC3H12A,ADRB1,ADAM12,MKI67,ELF5,TCN1,MS4A7,FOSL1,MMP10,MMP1,MMP12,HTR3A,…
HFH1	197	101	34.517765	0.00232	0.03699	2.634512020632184	1.4319156475783397	72.0	9.297476538307869	29.0	0.001351302197283249	0.039253457613994604	ANXA3,CENPE,TDO2,CCNB1,PCSK1,AGR3,INHBA,ARPC1B,NAMPT,TFEC,PI15,CTSL1,OMD,ECM2,TNC,SRGN,HTR7,CEP55,PLA2G2A,ZC3H12A,TCN1,MMP1,MMP12,GPRC5A,NR4A1,KRT6B,KRT6A,KRT77,GPR183,ITGBL1,IFI27,TNFRSF12A,IL21R,CDH3,CCL18,BIRC5,SOCS3,CASP14,CEACAM1,IGFL1,SAMSN1,CLDN8,KCNJ15,ITGB2,IL13RA2,TCHH,LCE3D,IVL,SPRR1B,SPRR2G,S100A9,S100A8,S100A7A,SELL,SELE,RGS1,CFH,ATF3,IL1B,NR4A2,CLEC3B,KY,ARL14,C1QTNF7,TMPRSS11D,IL8,…
SOX1	197	249	60.913704	0.00242	0.06391	2.6161846280160566	1.1944311822732276	197.0	17.323417053915836	52.0	4.2697472810957393E-4	0.06545421958197403	SPP1,DKK2,TDO2,IL7R,IL31RA,CCNB1,EDIL3,PCSK1,HBEGF,GPX3,AGR3,INHBA,ELN,TFPI2,TAC1,NAMPT,TFEC,AKR1B10,DPP6,PBK,PI15,CD274,KIAA1045,MELK,CTSL1,OMD,ECM2,TNC,SLC25A25,INA,MKI67,ELF5,TCN1,MS4A7,FOSL1,MMP1,MMP12,HTR3A,TMPRSS4,CD163,MFAP5,GALNT6,KRT6B,KRT6A,KRT77,TSPAN8,GJB2,GJB6,GPR183,ITGBL1,GZMB,CDKN3,DLGAP5,IFI27,BCL2A1,PRSS27,TNFRSF12A,IL21R,PRSS36,HAS3,CCL2,RAD54L,LEPR,NGF,CCL18,DSC2,DSG3,SERPINB4…
DBP	197	1080	98.47716	0.00254	0.41579	2.5951662806666214	0.3811259686787536	970.0	38.35039928569565	110.0	8.267673950695479E-4	0.4171850562165028	ANXA3,SPP1,CENPE,DKK2,TDO2,IL7R,IL31RA,CCNB1,EDIL3,PCSK1,LOX,HBEGF,CD14,GPX3,SERPINB1,TBX18,SGK1,SOD2,AGR3,IL6,INHBA,UPP1,ELN,TFPI2,TAC1,ARPC1B,SERPINE1,NAMPT,TFEC,AKR1B10,DPP6,DEFB4A,PBK,XKR4,PI15,FAM83A,CD274,CCL27,KIAA1045,MELK,MAMDC2,CTSL1,CKS2,OMD,ECM2,TNC,LHX2,SLC25A25,FCN1,SLC16A9,SRGN,C10orf99,HTR7,CEP55,INA,HSPB7,PLA2G2A,ZC3H12A,ADRB1,ADAM12,MKI67,ELF5,TCN1,MS4A7,FOSL1,MMP10,MMP1,MMP12,H…
HOXB13	197	99	36.54822	0.00291	0.01255	2.5361070051541676	1.9013562706764773	72.0	9.04014659920409	27.0	0.0020708677869837764	0.013530344952632374	SPP1,CENPE,IL31RA,TBX18,IL6,INHBA,UPP1,TFPI2,NAMPT,TFEC,PBK,CD274,CTSL1,OMD,TNC,SLC16A9,SRGN,HTR7,INA,PLA2G2A,MS4A7,MMP10,GPRC5A,KRT6B,TSPAN8,GJB2,GJB6,GZMB,IFI27,KIAA0101,RHCG,PRSS27,TNFRSF12A,IL21R,TPPP3,CCL18,DSC2,DSG3,SERPINB4,SERPINB3,PLAUR,LILRB1,PI3,SAMSN1,CLDN8,KCNJ15,ITGB2,IL13RA1,TCHH,LCE3D,SPRR4,SPRR1B,SPRR2B,S100A12,SELL,SELE,RGS1,CFH,G0S2,CCDC85A,PLEK,BUB1,ITGB6,SPC25,CTLA4,CCR5,ARL1…
CAP	197	797	98.47716	0.00291	0.02645	2.5361070051541676	1.577574312080424	711.0	30.544873987429106	86.0	0.0019278022591205034	0.026504239939465164	ANXA3,SPP1,CENPE,DKK2,TDO2,IL7R,IL31RA,CCNB1,EDIL3,PCSK1,LOX,HBEGF,CD14,GPX3,SERPINB1,TBX18,SGK1,SOD2,AGR3,IL6,INHBA,ELN,TFPI2,TAC1,ARPC1B,SERPINE1,NAMPT,TFEC,AKR1B10,DPP6,DEFB4A,PBK,PI15,FAM83A,CD274,CCL27,KIAA1045,MELK,MAMDC2,CTSL1,OMD,ECM2,TNC,LHX2,SLC25A25,FCN1,SLC16A9,SRGN,C10orf99,HTR7,CEP55,INA,HSPB7,PLA2G2A,ZC3H12A,ADRB1,ADAM12,MKI67,ELF5,TCN1,MS4A7,FOSL1,MMP10,MMP1,MMP12,HTR3A,TMPRSS4,CD…
TBP	197	2453	96.954315	0.00295	0.02226	2.530177967678578	1.65247482187183	2036.0	128.9460272991414	417.0	3.3188540971832226E-17	0.022182565353975985	ANXA3,SPP1,CENPE,DKK2,TDO2,IL7R,IL31RA,EDIL3,PCSK1,LOX,HBEGF,CD14,GPX3,TBX18,SGK1,SOD2,AGR3,IL6,INHBA,UPP1,ELN,TFPI2,TAC1,SERPINE1,NAMPT,TFEC,AKR1B10,DPP6,DEFB4A,PBK,XKR4,PI15,FAM83A,CD274,CCL27,KIAA1045,MELK,MAMDC2,CTSL1,CKS2,OMD,ECM2,TNC,LHX2,SLC25A25,FCN1,SLC16A9,SRGN,C10orf99,HTR7,CEP55,INA,HSPB7,PLA2G2A,ZC3H12A,ADRB1,ADAM12,MKI67,ELF5,TCN1,MS4A7,FOSL1,MMP10,MMP1,MMP12,HTR3A,TMPRSS4,CD163,MFA…
AIRE	197	39	15.736041	0.00296	0.03715	2.5287082956421165	1.4300411901952774	24.0	4.951948792539886	15.0	0.0032397994353888775	0.03716907526529197	IL7R,CCNB1,HBEGF,CTSL1,ECM2,SLC16A9,ELF5,MMP1,MMP12,GPRC5A,GJB6,GZMB,KIAA0101,BCL2A1,KRT16,DSC2,SERPINB4,SERPINB3,SAMSN1,ITGB2,KIF4A,SPRR3,S100A9,RGS1,CFH,IL20,ATF3,PLEK,SPC25,CCR5,BTC
HEN2	197	502	90.862946	0.0030	0.01816	2.5228787415053007	1.7408841452096693	433.0	23.63723874769458	69.0	0.0014644866427988776	0.01850850531756093	ANXA3,SPP1,CENPE,DKK2,TDO2,IL7R,IL31RA,CCNB1,EDIL3,PCSK1,LOX,HBEGF,CD14,GPX3,SERPINB1,TBX18,SGK1,AGR3,IL6,INHBA,ELN,TFPI2,TAC1,ARPC1B,SERPINE1,NAMPT,TFEC,AKR1B10,DPP6,DEFB4A,PBK,PI15,FAM83A,CD274,KIAA1045,MELK,MAMDC2,CTSL1,CKS2,OMD,ECM2,TNC,LHX2,SLC25A25,FCN1,SLC16A9,SRGN,C10orf99,HTR7,CEP55,INA,HSPB7,PLA2G2A,ZC3H12A,ADRB1,ADAM12,MKI67,ELF5,TCN1,MS4A7,FOSL1,MMP10,MMP12,HTR3A,TMPRSS4,CD163,MFAP5,G…
PAX2	197	997	98.47716	0.00306	0.05685	2.5142785710651747	1.2452695216873502	887.0	39.23632459736692	110.0	4.921681648895564E-4	0.057310161861561675	ANXA3,SPP1,CENPE,DKK2,TDO2,IL7R,IL31RA,CCNB1,EDIL3,PCSK1,LOX,HBEGF,CD14,GPX3,SERPINB1,TBX18,SGK1,SOD2,AGR3,IL6,INHBA,UPP1,ELN,TFPI2,TAC1,ARPC1B,SERPINE1,NAMPT,TFEC,AKR1B10,DPP6,DEFB4A,PBK,XKR4,PI15,FAM83A,CD274,KIAA1045,MELK,MAMDC2,CTSL1,CKS2,OMD,ECM2,TNC,LHX2,SLC25A25,FCN1,SLC16A9,SRGN,C10orf99,HTR7,CEP55,INA,HSPB7,PLA2G2A,ZC3H12A,ADRB1,ADAM12,MKI67,ELF5,TCN1,MS4A7,FOSL1,MMP10,MMP1,MMP12,HTR3A,T…
HNF3G	197	464	83.24873	0.00318	0.14411	2.4975728800562687	0.8413058993824212	395.0	24.055309441699233	69.0	8.494136063264198E-4	0.14370475935648325	ANXA3,SPP1,CENPE,TDO2,IL7R,IL31RA,CCNB1,EDIL3,PCSK1,CD14,GPX3,SERPINB1,TBX18,SGK1,AGR3,IL6,INHBA,UPP1,TFPI2,TAC1,ARPC1B,SERPINE1,NAMPT,TFEC,AKR1B10,DPP6,PI15,FAM83A,CD274,KIAA1045,MAMDC2,CTSL1,CKS2,OMD,ECM2,TNC,LHX2,SLC25A25,FCN1,SLC16A9,SRGN,C10orf99,HTR7,CEP55,HSPB7,PLA2G2A,ZC3H12A,ADRB1,ADAM12,MKI67,ELF5,TCN1,FOSL1,MMP10,MMP1,MMP12,HTR3A,CD163,MFAP5,GPRC5A,NR4A1,KRT6B,KRT6A,KRT77,WIF1,TSPAN8,L…
RBPJK	197	526	86.80203	0.00327	0.07621	2.485452249130754	1.117988040533619	449.0	26.425426760555276	77.0	5.721234407837806E-4	0.07725297204459121	CENPE,DKK2,TDO2,IL7R,IL31RA,CCNB1,EDIL3,PCSK1,LOX,HBEGF,CD14,GPX3,SERPINB1,TBX18,SOD2,AGR3,IL6,INHBA,UPP1,ELN,TFPI2,TAC1,ARPC1B,SERPINE1,NAMPT,AKR1B10,DPP6,DEFB4A,XKR4,PI15,FAM83A,CD274,CCL27,KIAA1045,MELK,MAMDC2,CTSL1,ECM2,TNC,LHX2,SLC25A25,FCN1,SLC16A9,SRGN,C10orf99,HTR7,CEP55,INA,HSPB7,PLA2G2A,ZC3H12A,ADRB1,ADAM12,MKI67,ELF5,TCN1,MS4A7,MMP10,MMP1,MMP12,HTR3A,TMPRSS4,CD163,MFAP5,GPRC5A,GALNT6,N…
HOXA9	197	86	34.517765	0.00336	0.00194	2.4736607260577665	2.712198272896882	61.0	8.389402727822777	25.0	0.002533073251499287	0.0022742272151140765	ANXA3,DKK2,TDO2,IL7R,IL31RA,LOX,TBX18,SGK1,AGR3,INHBA,TFPI2,TFEC,PI15,CD274,CKS2,OMD,LHX2,SLC16A9,C10orf99,PLA2G2A,MS4A7,FOSL1,MMP10,MMP12,CD163,MFAP5,KRT6A,TSPAN8,GPR183,IFI27,KIAA0101,CILP,CARHSP1,IL21R,CDH3,SOCS3,DSC2,DSG3,CASP14,CEACAM1,PI3,SAMSN1,KCNJ15,IL13RA2,IL13RA1,TCHH,LCE3D,SPRR4,S100A8,S100A7A,S100A7,SELL,SELE,PTGS2,RGS1,CFH,IL20,BUB1,IL1B,SPC25,CTLA4,EPHB1,S100P,C1QTNF7,TMPRSS11D,IL8…
CDXA	197	2154	97.96954	0.00363	0.04534	2.4400933828883455	1.3435184690455997	1843.0	108.25509789643787	311.0	3.2036639897896766E-11	0.0467225686301308	ANXA3,SPP1,CENPE,DKK2,TDO2,IL7R,IL31RA,CCNB1,EDIL3,PCSK1,LOX,HBEGF,CD14,GPX3,SERPINB1,TBX18,SGK1,SOD2,AGR3,IL6,INHBA,UPP1,TFPI2,TAC1,SERPINE1,NAMPT,TFEC,AKR1B10,DPP6,DEFB4A,PBK,XKR4,PI15,FAM83A,CD274,CCL27,KIAA1045,MELK,MAMDC2,CTSL1,CKS2,OMD,ECM2,TNC,LHX2,SLC25A25,FCN1,SLC16A9,SRGN,C10orf99,HTR7,CEP55,INA,HSPB7,PLA2G2A,ZC3H12A,ADRB1,ADAM12,MKI67,ELF5,TCN1,MS4A7,FOSL1,MMP10,MMP1,MMP12,HTR3A,TMPRSS…
FRA1	197	227	55.837563	0.00369	0.00852	2.432973642671282	2.0695604213968393	178.0	17.28641342580369	49.0	4.4469156500842887E-4	0.008578613776551175	DKK2,TDO2,IL7R,IL31RA,LOX,HBEGF,CD14,SERPINB1,SGK1,SOD2,IL6,INHBA,UPP1,TAC1,ARPC1B,SERPINE1,TFEC,AKR1B10,DEFB4A,XKR4,PI15,FAM83A,CCL27,KIAA1045,CTSL1,TNC,LHX2,FCN1,SRGN,C10orf99,HTR7,HSPB7,PLA2G2A,ZC3H12A,ADAM12,ELF5,FOSL1,MMP1,MMP12,TMPRSS4,CD163,GALNT6,KRT6B,KRT6A,KRT77,WIF1,LGR5,GJB2,GPR183,GZMB,CDKN3,IFI27,SERPINA1,KIAA0101,RHCG,IL21R,PRSS36,TPPP3,CALB2,CYBA,CCL2,RAD54L,CHI3L2,NGF,CCL18,KRT16…
TEF1	197	488	77.157364	0.0038	0.00613	2.420216396060186	2.2125395176376723	405.0	28.792000441787657	83.0	9.638273159073289E-5	0.006289831656301847	ANXA3,SPP1,CENPE,DKK2,IL7R,IL31RA,CCNB1,PCSK1,CD14,GPX3,SERPINB1,TBX18,SGK1,SOD2,AGR3,INHBA,UPP1,ELN,TFPI2,TAC1,NAMPT,TFEC,AKR1B10,DPP6,DEFB4A,XKR4,PI15,CCL27,KIAA1045,MAMDC2,CTSL1,ECM2,TNC,SLC25A25,FCN1,SRGN,C10orf99,HTR7,CEP55,HSPB7,PLA2G2A,ZC3H12A,ADAM12,ELF5,TCN1,MMP10,MMP1,MMP12,HTR3A,TMPRSS4,CD163,MFAP5,GPRC5A,GALNT6,NR4A1,KRT6B,KRT6A,WIF1,TSPAN8,GJB2,GJB6,GPR183,GZMB,DLGAP5,IFI27,SERPINA1,…
HOXD13	197	324	71.06599	0.00388	0.03763	2.4111682772329006	1.424465790677969	266.0	20.806631305849447	58.0	6.258607053219634E-4	0.038766152740489716	ANXA3,SPP1,CENPE,DKK2,TDO2,IL7R,IL31RA,LOX,CD14,TBX18,SGK1,AGR3,IL6,INHBA,UPP1,TFPI2,TAC1,NAMPT,TFEC,DEFB4A,PBK,PI15,CD274,CTSL1,CKS2,OMD,ECM2,TNC,LHX2,SLC16A9,SRGN,C10orf99,HTR7,CEP55,INA,PLA2G2A,ZC3H12A,ADRB1,TCN1,MS4A7,FOSL1,MMP10,MMP1,MMP12,TMPRSS4,CD163,MFAP5,GPRC5A,NR4A1,KRT6B,KRT6A,KRT77,WIF1,TSPAN8,LGR5,GJB2,GJB6,GPR183,GZMB,CDKN3,DLGAP5,IFI27,KIAA0101,RHCG,PRSS27,TNFRSF12A,CARHSP1,IL21R,…
FOXA2	197	255	65.989845	0.0039	0.01436	2.4089354047549354	1.8428455486198894	206.0	17.1831315164018	49.0	0.0010527059546562667	0.014842927240261403	ANXA3,SPP1,CENPE,DKK2,TDO2,IL7R,IL31RA,CCNB1,EDIL3,PCSK1,HBEGF,CD14,TBX18,SGK1,SOD2,AGR3,IL6,INHBA,UPP1,TFPI2,TAC1,TFEC,AKR1B10,PBK,PI15,FAM83A,CD274,KIAA1045,MELK,CTSL1,CKS2,OMD,ECM2,FCN1,SLC16A9,SRGN,CEP55,INA,PLA2G2A,ZC3H12A,ADAM12,MKI67,ELF5,TCN1,MS4A7,FOSL1,MMP10,MMP1,MMP12,HTR3A,CD163,MFAP5,GPRC5A,KRT6B,KRT6A,TSPAN8,GPR183,ITGBL1,GZMB,CDKN3,DLGAP5,IFI27,SERPINA1,KIAA0101,BCL2A1,RHCG,TNFRSF1…
CEBPA	197	1071	97.96954	0.00396	0.21142	2.4023048266416027	0.6748539323320358	958.0	41.3884958660244	113.0	6.098359783371821E-4	0.2138452951275523	ANXA3,SPP1,CENPE,DKK2,TDO2,IL7R,IL31RA,CCNB1,EDIL3,PCSK1,LOX,HBEGF,CD14,GPX3,SERPINB1,TBX18,SGK1,SOD2,AGR3,IL6,INHBA,UPP1,ELN,TFPI2,TAC1,ARPC1B,SERPINE1,NAMPT,TFEC,AKR1B10,DPP6,DEFB4A,PBK,XKR4,PI15,FAM83A,CD274,CCL27,KIAA1045,MELK,MAMDC2,CTSL1,CKS2,OMD,ECM2,TNC,LHX2,SLC25A25,FCN1,SLC16A9,SRGN,C10orf99,HTR7,CEP55,INA,HSPB7,PLA2G2A,ZC3H12A,ADRB1,ADAM12,MKI67,ELF5,TCN1,MS4A7,FOSL1,MMP10,MMP1,MMP12,H…
FOXJ3	197	207	60.913704	0.00401	0.0669	2.396855648989115	1.174573882386951	168.0	13.87022481923167	39.0	0.0036420015289255468	0.06835864058281506	ANXA3,CENPE,DKK2,TDO2,IL7R,IL31RA,CCNB1,CD14,SERPINB1,TBX18,SGK1,SOD2,AGR3,IL6,INHBA,TFPI2,SERPINE1,TFEC,AKR1B10,PBK,CCL27,KIAA1045,MAMDC2,CTSL1,OMD,ECM2,TNC,SLC25A25,FCN1,SLC16A9,SRGN,HTR7,CEP55,HSPB7,PLA2G2A,ADAM12,MKI67,TCN1,MS4A7,FOSL1,MMP10,HTR3A,CD163,KRT6B,KRT6A,KRT77,WIF1,TSPAN8,LGR5,GJB6,GZMB,DLGAP5,IFI27,KIAA0101,CILP,BCL2A1,RHCG,PRSS27,TNFRSF12A,CARHSP1,IL21R,PRSS36,CDH3,HAS3,CALB2,CYB…
MAF	197	158	57.86802	0.00408	6.0E-4	2.389339850979271	3.221848728988476	125.0	11.621356894941096	33.0	0.003684684767509655	5.802340582797243E-4	CENPE,DKK2,TDO2,IL7R,IL31RA,PCSK1,LOX,HBEGF,CD14,GPX3,TBX18,SGK1,SOD2,IL6,INHBA,UPP1,TAC1,ARPC1B,SERPINE1,TFEC,AKR1B10,DEFB4A,XKR4,PI15,FAM83A,CCL27,KIAA1045,MELK,CTSL1,TNC,FCN1,SRGN,C10orf99,HTR7,CEP55,HSPB7,PLA2G2A,ZC3H12A,ADAM12,ELF5,MS4A7,FOSL1,MMP1,MMP12,TMPRSS4,CD163,GALNT6,KRT6B,KRT6A,WIF1,LGR5,GJB2,GPR183,GZMB,CDKN3,SERPINA1,CILP,BCL2A1,RHCG,IL21R,PRSS36,TPPP3,CALB2,CYBA,CCL2,RAD54L,LEPR,…
NFAT5	197	332	80.20305	0.00443	0.01847	2.353596253719688	1.733533093375675	283.0	18.005792364857964	49.0	0.0042740413909992375	0.019114336321646712	SPP1,CENPE,DKK2,TDO2,IL7R,IL31RA,CCNB1,PCSK1,LOX,CD14,GPX3,SGK1,SOD2,AGR3,IL6,INHBA,UPP1,ELN,TFPI2,TAC1,SERPINE1,NAMPT,TFEC,AKR1B10,DPP6,DEFB4A,PBK,XKR4,PI15,FAM83A,CD274,CCL27,MELK,MAMDC2,CTSL1,CKS2,OMD,LHX2,SLC25A25,FCN1,SLC16A9,SRGN,C10orf99,CEP55,INA,PLA2G2A,ZC3H12A,ADRB1,ADAM12,MKI67,ELF5,TCN1,MS4A7,MMP10,MMP1,MMP12,HTR3A,TMPRSS4,CD163,MFAP5,GPRC5A,GALNT6,NR4A1,KRT6B,KRT6A,KRT77,WIF1,TSPAN8,…
PRX2	197	227	64.467	0.00445	0.00322	2.351639999635224	2.4921441186672735	183.0	15.847652427488686	44.0	0.0016124665469139212	0.003351414597618744	ANXA3,SPP1,CENPE,DKK2,TDO2,IL7R,IL31RA,EDIL3,PCSK1,HBEGF,CD14,SERPINB1,TBX18,SGK1,AGR3,IL6,TFPI2,TAC1,TFEC,DEFB4A,PI15,CD274,CCL27,MAMDC2,CTSL1,OMD,ECM2,SLC25A25,SRGN,C10orf99,HTR7,PLA2G2A,ADRB1,ADAM12,MKI67,ELF5,TCN1,MS4A7,FOSL1,MMP10,MMP1,MMP12,HTR3A,TMPRSS4,GPRC5A,GALNT6,KRT6B,KRT77,TSPAN8,GJB6,GPR183,ITGBL1,GZMB,CDKN3,DLGAP5,IFI27,KIAA0101,BCL2A1,RHCG,TNFRSF12A,IL21R,FBXL19,CALB2,CCL2,LEPR,NG…
SOX21	197	499	84.26396	0.00457	0.05583	2.3400838119385203	1.253132357906029	423.0	27.621874243140837	76.0	4.6696230525189485E-4	0.05869731038821172	ANXA3,SPP1,DKK2,TDO2,IL7R,IL31RA,CCNB1,EDIL3,PCSK1,HBEGF,CD14,GPX3,SERPINB1,TBX18,SGK1,SOD2,AGR3,IL6,INHBA,ELN,TFPI2,TAC1,ARPC1B,SERPINE1,NAMPT,TFEC,AKR1B10,DPP6,DEFB4A,PBK,PI15,CCL27,MELK,MAMDC2,CTSL1,CKS2,OMD,ECM2,TNC,SLC25A25,SLC16A9,SRGN,C10orf99,HTR7,CEP55,HSPB7,PLA2G2A,ZC3H12A,ADAM12,ELF5,TCN1,MS4A7,MMP10,MMP1,MMP12,HTR3A,TMPRSS4,CD163,MFAP5,GPRC5A,GALNT6,NR4A1,KRT6B,KRT6A,KRT77,TSPAN8,LGR5…
NFKAPPAB	197	34	13.705584	0.00509	0.02357	2.293282208458211	1.6276404310611423	20.0	4.765176938488014	14.0	0.003764312115026424	0.024069278201032305	TDO2,IL7R,TBX18,UPP1,LHX2,HSPB7,GALNT6,WIF1,TNFRSF12A,CHI3L2,NGF,DSC2,LILRB2,LILRB1,TYMP,KIF4A,SELE,TNN,ANGPTL1,PTGS2,RGS1,NR4A2,ITGB6,AP1S3,NCAPG,CXCL5,CXCL2
AP3	197	253	63.45178	0.00522	0.09266	2.282329483149737	1.03310769283534	207.0	17.01267321851582	46.0	0.001839354556403762	0.09329803702473756	ANXA3,SPP1,CENPE,DKK2,TDO2,IL7R,IL31RA,CCNB1,EDIL3,PCSK1,CD14,GPX3,SERPINB1,AGR3,IL6,INHBA,TFPI2,TAC1,SERPINE1,TFEC,PBK,PI15,CD274,KIAA1045,MELK,CTSL1,OMD,ECM2,LHX2,FCN1,SLC16A9,SRGN,HTR7,CEP55,INA,PLA2G2A,ADRB1,ELF5,MS4A7,MMP10,MMP1,MMP12,HTR3A,TMPRSS4,CD163,MFAP5,GPRC5A,GALNT6,KRT6B,KRT77,TSPAN8,LGR5,GJB6,GPR183,GZMB,CDKN3,KIAA0101,RHCG,CARHSP1,IL21R,TPPP3,CDH3,HAS3,CALB2,CYBA,RAD54L,LEPR,CCL18…
HNF3ALPHA	197	360	73.60406	0.00523	0.36195	2.2814983296562894	0.4413514069632815	304.0	20.682374742558626	56.0	0.0017840133852809936	0.3633501347259424	ANXA3,SPP1,CENPE,TDO2,IL7R,IL31RA,CCNB1,EDIL3,PCSK1,CD14,GPX3,SERPINB1,TBX18,SGK1,AGR3,IL6,INHBA,UPP1,TFPI2,TAC1,SERPINE1,TFEC,AKR1B10,DPP6,PI15,FAM83A,CD274,KIAA1045,MAMDC2,CTSL1,OMD,ECM2,TNC,SLC25A25,FCN1,SLC16A9,SRGN,C10orf99,HTR7,HSPB7,PLA2G2A,ZC3H12A,ADRB1,ADAM12,MKI67,ELF5,TCN1,FOSL1,MMP10,MMP1,MMP12,HTR3A,CD163,MFAP5,GPRC5A,NR4A1,KRT6B,KRT77,WIF1,TSPAN8,LGR5,GJB6,GPR183,ITGBL1,GZMB,CDKN3,D…
SOX	197	1134	99.492386	0.00563	0.38704	2.249491602930185	0.41224416106374107	1040.0	36.01995625014481	94.0	0.0058458097890174985	0.38715729231445833	ANXA3,SPP1,CENPE,DKK2,TDO2,IL7R,IL31RA,CCNB1,EDIL3,PCSK1,LOX,HBEGF,CD14,GPX3,SERPINB1,TBX18,SGK1,SOD2,AGR3,IL6,INHBA,UPP1,ELN,TFPI2,TAC1,ARPC1B,SERPINE1,NAMPT,TFEC,AKR1B10,DPP6,DEFB4A,PBK,XKR4,PI15,FAM83A,CD274,CCL27,KIAA1045,MELK,MAMDC2,CTSL1,CKS2,OMD,ECM2,TNC,LHX2,SLC25A25,FCN1,SLC16A9,SRGN,C10orf99,HTR7,CEP55,INA,HSPB7,PLA2G2A,ZC3H12A,ADRB1,ADAM12,MKI67,ELF5,TCN1,MS4A7,FOSL1,MMP10,MMP1,MMP12,H…
CEBPB	197	493	67.51269	0.00563	0.38435	2.249491602930185	0.4152731125472741	410.0	31.37688394407699	83.0	9.921823659440104E-5	0.3858873433076355	ANXA3,SPP1,CENPE,DKK2,TDO2,IL7R,IL31RA,CCNB1,CD14,GPX3,SERPINB1,IL6,UPP1,TAC1,ARPC1B,NAMPT,TFEC,AKR1B10,DPP6,DEFB4A,PBK,PI15,FAM83A,CD274,MAMDC2,CTSL1,OMD,SLC25A25,FCN1,SLC16A9,SRGN,HTR7,CEP55,HSPB7,ZC3H12A,ADRB1,MKI67,TCN1,MS4A7,FOSL1,MMP1,MMP12,TMPRSS4,CD163,MFAP5,GPRC5A,GALNT6,KRT6B,KRT6A,KRT77,WIF1,TSPAN8,LGR5,GJB2,GJB6,GPR183,ITGBL1,CDKN3,IFI27,SERPINA1,KIAA0101,BCL2A1,IL21R,FBXL19,PRSS36,CD…
BACH2	197	69	29.949238	0.00594	0.00424	2.2262135505628464	2.3726341275490594	49.0	7.217612094841083	20.0	0.006497325865573765	0.004570878408503961	DKK2,IL7R,IL31RA,CD14,SGK1,SOD2,IL6,UPP1,TAC1,AKR1B10,DEFB4A,PI15,FAM83A,CCL27,KIAA1045,TNC,HTR7,HSPB7,ELF5,FOSL1,MMP1,MMP12,LGR5,GPR183,GZMB,PRSS36,TPPP3,CALB2,CCL2,NGF,KRT16,DSC2,CASP14,PLAUR,IGFL1,KLK6,FPR1,MMP9,CLDN8,KCNJ15,TCHH,LCE3D,IVL,SPRR3,SPRR1B,SPRR2B,S100A2,SELL,SELE,TNNT2,IL20,RRM2,CLEC3B,KY,EPHB1,ARL14,S100P,IL8,AREG
TFIIA	197	50	21.827412	0.00624	0.01221	2.2048154091352843	1.9132843251579943	34.0	5.8965309275123	16.0	0.007215726775487847	0.013148632727987195	SPP1,TDO2,PCSK1,TFPI2,SERPINE1,NAMPT,DPP6,DEFB4A,PBK,FAM83A,CCL27,MAMDC2,SLC25A25,FCN1,C10orf99,CEP55,INA,HSPB7,ADRB1,MKI67,KRT6B,GPR183,DLGAP5,RHCG,CALB2,LEPR,CCL18,DSG3,CASP14,PI3,ADAMTS1,IL13RA1,SPRR1B,SPRR2G,S100A12,S100A2,CCDC85A,CXCR4,ITGB6,SPC25,IL8,CXCL5,AREG
FEV	197	302	75.63452	0.00627	0.02945	2.2027324744242525	1.5309147107214585	257.0	17.50523053828293	45.0	0.0052802156032465955	0.03134879574921613	ANXA3,SPP1,CENPE,DKK2,TDO2,IL7R,IL31RA,CCNB1,HBEGF,CD14,GPX3,SGK1,SOD2,AGR3,IL6,INHBA,UPP1,TFPI2,TAC1,SERPINE1,AKR1B10,DPP6,DEFB4A,PI15,FAM83A,CD274,CCL27,MELK,MAMDC2,CTSL1,OMD,ECM2,TNC,LHX2,SLC25A25,FCN1,SRGN,CEP55,PLA2G2A,ADAM12,ELF5,TCN1,MS4A7,MMP10,MMP12,HTR3A,TMPRSS4,CD163,MFAP5,GALNT6,NR4A1,KRT6B,KRT77,WIF1,TSPAN8,LGR5,GJB2,GJB6,ITGBL1,GZMB,CDKN3,DLGAP5,SERPINA1,KIAA0101,CILP,RHCG,TNFRSF12A…
CEBPD	197	448	79.695435	0.00636	0.2622	2.1965428843922874	0.5813673161210913	383.0	24.910657469596984	65.0	0.0014860684622167004	0.2627178849099554	ANXA3,SPP1,CENPE,DKK2,TDO2,IL7R,IL31RA,CCNB1,EDIL3,PCSK1,LOX,CD14,SERPINB1,SOD2,AGR3,IL6,INHBA,UPP1,TAC1,ARPC1B,SERPINE1,NAMPT,TFEC,AKR1B10,DPP6,DEFB4A,PBK,XKR4,PI15,FAM83A,CD274,KIAA1045,MAMDC2,CTSL1,OMD,TNC,LHX2,SLC25A25,FCN1,SLC16A9,SRGN,HTR7,CEP55,PLA2G2A,ZC3H12A,ADRB1,ADAM12,MKI67,ELF5,TCN1,MS4A7,MMP10,MMP1,MMP12,HTR3A,TMPRSS4,CD163,MFAP5,GPRC5A,GALNT6,KRT6B,KRT6A,KRT77,WIF1,TSPAN8,LGR5,GJB2…
CHOP	197	116	43.654823	0.00672	0.00983	2.1726307303937853	2.0074464875135933	90.0	9.88271796387787	26.0	0.006587607285537787	0.009905707081232422	ANXA3,SPP1,CENPE,DKK2,IL7R,IL31RA,EDIL3,PCSK1,CD14,GPX3,SERPINB1,UPP1,TFPI2,TAC1,TFEC,AKR1B10,DPP6,DEFB4A,PBK,XKR4,FAM83A,CD274,MELK,CTSL1,ECM2,TNC,SRGN,C10orf99,HTR7,PLA2G2A,TCN1,MMP10,MMP1,CD163,GPRC5A,KRT6B,KRT77,TSPAN8,GJB6,ITGBL1,CDKN3,DLGAP5,IFI27,SERPINA1,TNFRSF12A,CARHSP1,IL21R,TPPP3,HAS3,RAD54L,LEPR,NGF,CCL18,BIRC5,DSC2,DSG3,CEACAM1,PLAUR,C5AR1,LILRB2,LILRB1,PI3,ADAMTS1,KCNJ15,ITGB2,KIF4…
HFH3	197	302	70.05076	0.00736	0.16184	2.1331221760256054	0.7909141122335164	254.0	18.685044867208717	48.0	0.0032014778112814213	0.16294483747130678	ANXA3,SPP1,CENPE,TDO2,IL7R,IL31RA,CCNB1,EDIL3,PCSK1,HBEGF,CD14,GPX3,SERPINB1,SGK1,AGR3,IL6,INHBA,UPP1,TFPI2,TAC1,SERPINE1,TFEC,AKR1B10,DPP6,PBK,PI15,FAM83A,CCL27,MAMDC2,CTSL1,CKS2,OMD,ECM2,TNC,SLC25A25,FCN1,C10orf99,HTR7,CEP55,HSPB7,PLA2G2A,ZC3H12A,ADRB1,MKI67,ELF5,TCN1,MMP10,MMP1,MMP12,HTR3A,TMPRSS4,CD163,MFAP5,GPRC5A,NR4A1,KRT6B,KRT77,WIF1,TSPAN8,LGR5,GJB2,GJB6,GPR183,ITGBL1,GZMB,CDKN3,DLGAP5,I…
P50P50	197	71	29.949238	0.00779	0.01288	2.108462532408358	1.890084127339311	52.0	7.32977954375136	19.0	0.009110444829081443	0.013938665073728014	IL7R,HBEGF,SERPINB1,IL6,ELN,TFPI2,DEFB4A,PBK,MELK,TNC,SLC16A9,HSPB7,PLA2G2A,MMP1,MFAP5,GPRC5A,GALNT6,KRT6B,WIF1,TSPAN8,GPR183,ITGBL1,CILP,RHCG,PRSS27,CARHSP1,PRSS36,CDH3,CYBA,RAD54L,LEPR,NGF,CCL18,BIRC5,SOCS3,IGFL1,LILRB2,LILRB1,PI3,MMP9,ADAMTS1,KIF4A,IL13RA1,IVL,SPRR4,SPRR1B,S100A9,S100A7,SELE,ANGPTL1,PTGS2,FAIM3,G0S2,NR4A2,NCAPG,TMPRSS11D,IL8,CXCL5,CXCL2
TR4	197	919	98.47716	0.00848	0.31443	2.071604131885078	0.5024760265093997	837.0	33.30603693698376	82.0	0.006695720144437123	0.3147625827285124	ANXA3,SPP1,CENPE,DKK2,TDO2,IL7R,IL31RA,CCNB1,EDIL3,PCSK1,LOX,HBEGF,CD14,GPX3,SERPINB1,TBX18,SGK1,SOD2,AGR3,IL6,INHBA,UPP1,ELN,TFPI2,TAC1,ARPC1B,SERPINE1,NAMPT,TFEC,AKR1B10,DPP6,DEFB4A,PBK,XKR4,PI15,FAM83A,CD274,CCL27,KIAA1045,MELK,MAMDC2,CTSL1,CKS2,OMD,ECM2,TNC,LHX2,SLC25A25,FCN1,SLC16A9,SRGN,C10orf99,HTR7,CEP55,INA,HSPB7,PLA2G2A,ZC3H12A,ADRB1,ADAM12,MKI67,ELF5,TCN1,MS4A7,FOSL1,MMP10,MMP1,MMP12,H…
MEIS1	197	785	95.93909	0.00901	0.26647	2.0452752015797984	0.5743517021190555	707.0	32.295469901629204	78.0	0.004883383726428562	0.26833484126378787	ANXA3,SPP1,CENPE,DKK2,TDO2,IL7R,IL31RA,CCNB1,EDIL3,PCSK1,HBEGF,CD14,GPX3,SERPINB1,TBX18,AGR3,IL6,INHBA,UPP1,ELN,TFPI2,TAC1,ARPC1B,SERPINE1,NAMPT,TFEC,AKR1B10,DEFB4A,PBK,XKR4,PI15,FAM83A,CD274,CCL27,KIAA1045,MELK,MAMDC2,CTSL1,CKS2,OMD,ECM2,TNC,LHX2,SLC25A25,FCN1,SLC16A9,SRGN,C10orf99,HTR7,CEP55,HSPB7,PLA2G2A,ZC3H12A,ADRB1,ADAM12,MKI67,ELF5,TCN1,MS4A7,FOSL1,MMP10,MMP1,MMP12,HTR3A,TMPRSS4,CD163,MFAP…
HOXA10	197	102	38.071068	0.00916	0.00869	2.0381045310939245	2.060980244522245	77.0	9.757708787926498	25.0	0.0061106819445179775	0.009418051895892645	SPP1,CENPE,TDO2,IL31RA,GPX3,TBX18,SGK1,SOD2,AGR3,IL6,INHBA,TFPI2,TFEC,PBK,CTSL1,CKS2,OMD,ECM2,TNC,LHX2,HTR7,CEP55,PLA2G2A,ZC3H12A,ADRB1,TCN1,MMP10,MMP12,CD163,MFAP5,GPRC5A,KRT6A,TSPAN8,GJB6,GPR183,IFI27,KIAA0101,TNFRSF12A,CARHSP1,CCL2,CCL18,SOCS3,NDC80,DSC2,DSG3,SERPINB4,SERPINB3,CASP14,CEACAM1,PLAUR,PI3,SAMSN1,IL13RA2,IL13RA1,LCE3D,SPRR4,SPRR1B,SPRR2G,S100A12,SELL,SELE,ANGPTL1,PTGS2,CFH,IL20,IL2…
HDX	197	245	67.00507	0.00951	0.02111	2.021819472269961	1.6755117648652431	205.0	16.23843277238065	40.0	0.005969194452059508	0.021179881714899523	ANXA3,SPP1,CENPE,DKK2,TDO2,IL7R,IL31RA,CCNB1,EDIL3,PCSK1,GPX3,SERPINB1,TBX18,IL6,INHBA,ELN,TFPI2,TAC1,ARPC1B,TFEC,DPP6,PBK,PI15,FAM83A,CD274,KIAA1045,MELK,CTSL1,CKS2,OMD,ECM2,TNC,LHX2,SLC25A25,SRGN,C10orf99,HTR7,CEP55,PLA2G2A,ADRB1,ADAM12,ELF5,TCN1,MS4A7,FOSL1,MMP10,MMP1,MMP12,HTR3A,TMPRSS4,CD163,MFAP5,KRT6B,KRT6A,KRT77,WIF1,TSPAN8,LGR5,GJB2,GPR183,ITGBL1,CDKN3,IFI27,KIAA0101,RHCG,PRSS27,TNFRSF12…
MEF2	197	87	23.857868	0.00996	0.01251	2.001740643994115	1.9027426973626274	59.0	10.730119748588896	28.0	7.94842405222539E-4	0.013603835368673886	ANXA3,PCSK1,HBEGF,GPX3,TBX18,AGR3,INHBA,TAC1,NAMPT,PBK,CD274,MELK,CKS2,OMD,ECM2,TNC,SRGN,HTR7,CEP55,HSPB7,PLA2G2A,NR4A1,KRT6B,KRT77,GPR183,ITGBL1,GZMB,TNFRSF12A,IL21R,PRSS36,CCL2,CASP14,IGFL1,UBE2S,KCNJ15,IVL,SPRR4,SPRR2B,PTGS2,ITGB6,CTLA4,POC1A,KY,C1QTNF7,NCAPG,IL8,AREG
LPOLYA	197	509	84.26396	0.01023	0.03156	1.990124360733617	1.5008630050197016	439.0	29.066261052689867	70.0	0.0013046897138930947	0.03287116432920424	ANXA3,SPP1,CENPE,TDO2,IL7R,IL31RA,EDIL3,PCSK1,LOX,HBEGF,CD14,GPX3,TBX18,SGK1,SOD2,AGR3,IL6,INHBA,UPP1,TFPI2,TAC1,SERPINE1,NAMPT,TFEC,AKR1B10,DPP6,PBK,PI15,FAM83A,CD274,KIAA1045,MELK,CTSL1,CKS2,OMD,ECM2,TNC,LHX2,FCN1,SLC16A9,SRGN,HTR7,CEP55,INA,HSPB7,PLA2G2A,ZC3H12A,ADRB1,ADAM12,ELF5,TCN1,MS4A7,FOSL1,MMP10,MMP1,MMP12,HTR3A,TMPRSS4,CD163,MFAP5,GPRC5A,KRT6B,KRT6A,KRT77,WIF1,TSPAN8,LGR5,GJB2,GJB6,GPR…
